# Supplementary material for: Discovery of Novel Coumarin-Schiff Base Hybrids as Potential Acetylcholinesterase Inhibitors: Design, Synthesis, Enzyme Inhibition, and Computational Studies
Source: MDPI journal article supplement (doi:10.3390/ph16070971), 2023-07-06
Supplement: s1 [file s1]

# Discovery of novel coumarin-Schiff base hybrids as potential acetylcholinesterase inhibitors: Design, synthesis, enzyme inhibition, and computational studies

Aso Hameed Hasan <sup>1,2</sup>, Faruq Azeez Abdulrahman <sup>3</sup>, Ahmad J. Obaidullah <sup>4</sup>, Hadil Faris Alotaibi <sup>5</sup>, Mohammed M. Alanazi <sup>4</sup>, Mahmoud A. Noamaan <sup>6</sup>, Sankaranarayanan Murugesan <sup>7</sup>, Syazwani Itri Amran <sup>8</sup>, Ajmal R. Bhat <sup>9</sup> and Joazaizulfazli Jamalis <sup>1,\*</sup>

<sup>1</sup>Department of Chemistry, Faculty of Science, University Teknologi Malaysia, Johor Bahru 81310, Johor, Malaysia; aso.hameed@garmian.edu.krd

<sup>2</sup>Department of Chemistry, College of Science, University of Garmian, Kalar 46021, Kurdistan Region, Iraq

<sup>3</sup>Department of Pharmacy, Kalar Private Technical Institute, Kalar 46021, Kurdistan Region, Iraq; farouqpharma85@gmail.com

<sup>4</sup>Department of Pharmaceutical Chemistry, College of Pharmacy, King Saud University, Riyadh 11451, Saudi Arabia; aobaidullah@ksu.edu.sa (A.J.O.); mmalanazi@ksu.edu.sa (M.M.A.)

<sup>5</sup>Department of Pharmaceutical Sciences, College of Pharmacy, Princess Nourah bint AbdulRahman University, Riyadh 11671, Saudi Arabia; hfalotaibi@pnu.edu.sa

<sup>6</sup>Mathematics Department, Faculty of Science, Cairo University, Giza 12613, Egypt; noamaan@sci.cu.edu.eg

<sup>7</sup>Medicinal Chemistry Research Laboratory, Birla Institute of Technology & Science Pilani (BITS Pilani), Pilani Campus, Pilani 333031, Rajasthan, India; murugesan@pilani.bits-pilani.ac.in

<sup>8</sup>Department of Biosciences, Faculty of Science, Universiti Teknologi Malaysia, Johor Bahru 81310, Johor, Malaysia; syazwaniitri@utm.my

<sup>9</sup>Department of Chemistry, R.T.M. Nagpur University, 440033, Nagpur, India; bhatajmal@gmail.com

\*Corresponding author E-mail: [joazaizulfazli@utm.my](mailto:joazaizulfazli@utm.my) (Joazaizulfazli Jamalis).

## EXPERIMENTAL

### *In vitro* inhibition study on AChE

The assay for AChE inhibitory activity was done based on a modified protocol [1-5]. Acetylcholinesterase (Type VI-S, from Electrophorus electricus), 5,5'-dithiobis-2-nitrobenzoic acid (Ellman's reagent, DTNB) and acetylthiocholine chloride (ATCI) were purchased from Sigma Aldrich. Enzyme solutions were prepared to give 0.28 units/mL aliquots. Stock solutions were prepared by dissolving 1 mg of tested compounds in 1 mL of DMSO and diluted to a final concentration of 1000, 800, 600, 400, 200, 100, and 50 µg/mL. The assay buffer solution A (pH = 8.0) was prepared by taking 93.2 mL of solution (6 g of sodium dihydrogen phosphate was dissolved in 500 mL of deionized water) and mixed with 6.8 mL of solution (7 g of sodium hydrogen phosphate was dissolved in 500 mL of deionized water) and adjusted. 57.7 mL of sodium dihydrogen phosphate and 42.3 mL of sodium hydrogen phosphate were mixed and adjusted to prepare the buffer B (pH = 7.0). Furthermore, fresh solutions of 0.01 M DTNB (0.396 g of DTNB and 15 mg NaHCO<sub>3</sub> were dissolved in 100 mL of the buffer B) in a dark place, and 0.075 M ATCI (0.2048 g of ATCI was dissolved in 10 mL of deionized water), were prepared. In 96-well plates, 20 µL of the test compounds, 10 µL of DTNB, 15 µL of the enzyme (AChE) and 140 µL of the buffer solution A, were added in dark conditions and incubated for 15 min, followed by the addition of ATCI (10 µL) and incubated again for the same period. The activity was measured by reading the absorbance of the solution at 412 nm. Blanks containing all the components except the enzyme were carried out. IC<sub>50</sub> values were calculated as the concentration of a compound that produces 50% enzyme activity inhibition using the GraphPad Prism 8 programme package. Results are expressed as the mean ± SD of at least three different experiments performed in triplicate.

### IC<sub>50</sub> Calculations

Percentage inhibition was calculated by this formula:

$$\% \text{ (Inhibition)} = \frac{B - A}{B} \times 100$$

- A= absorbance of the enzyme with the test sample;
- B = absorbance of the enzyme without test sample.
- Each experiment was repeated thrice.

- Concentrations were converted from  $\mu\text{g/mL}$  to  $\mu\text{M}$ .
- $\text{IC}_{50}$  value was calculated by GraphPad Prism.
- Galantamine was used as a reference compound.

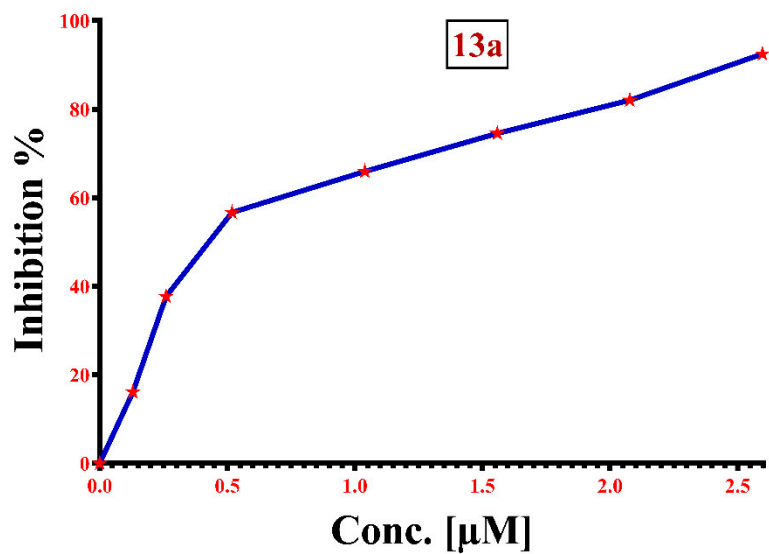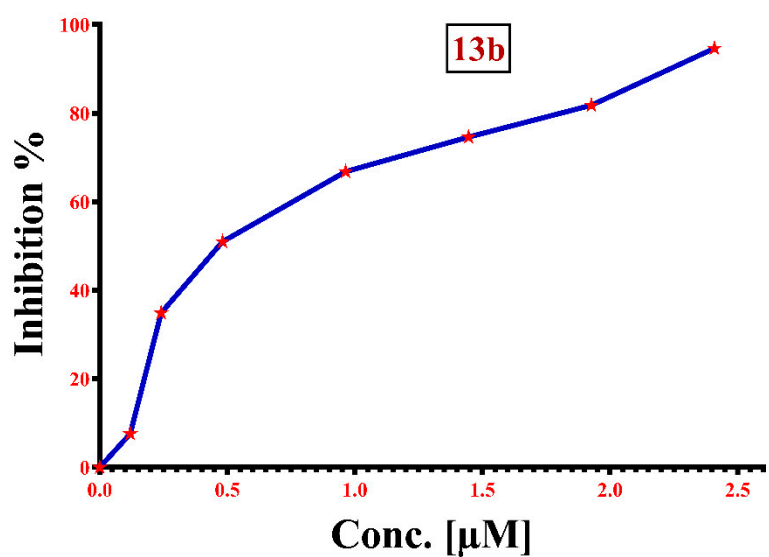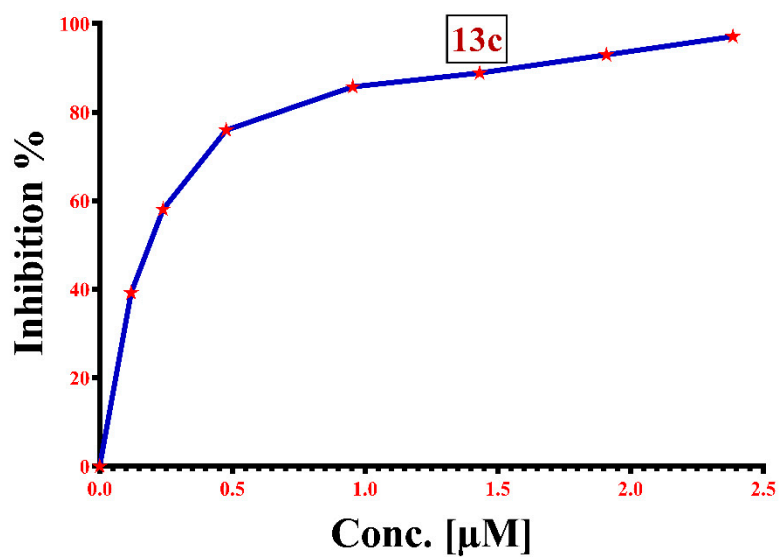

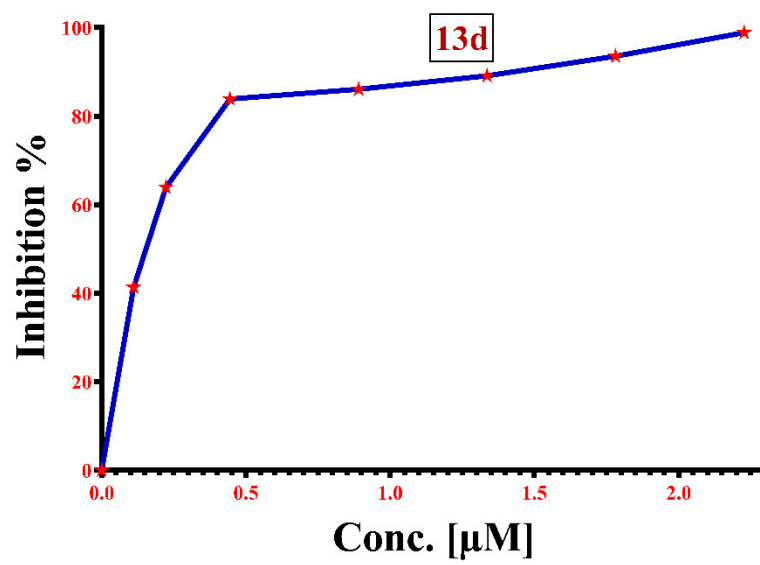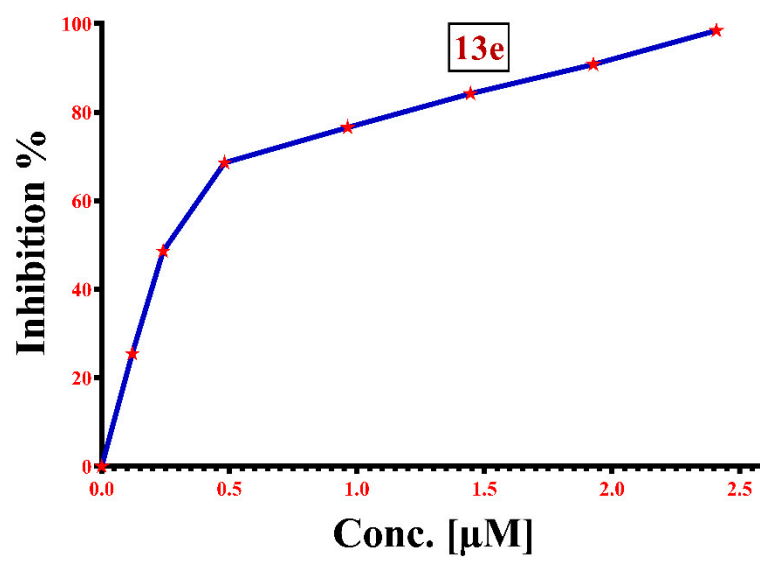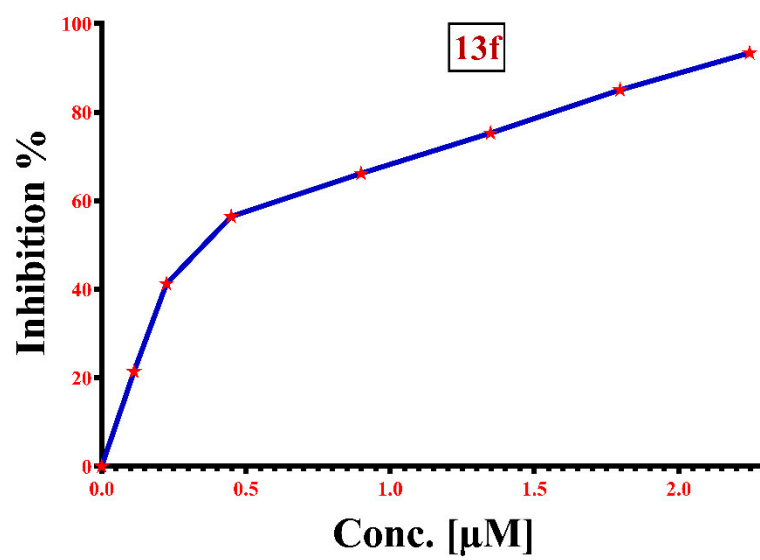

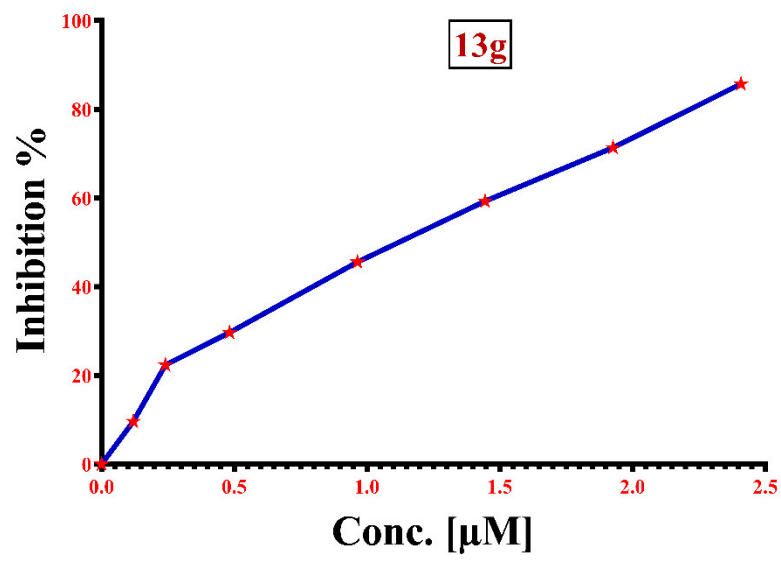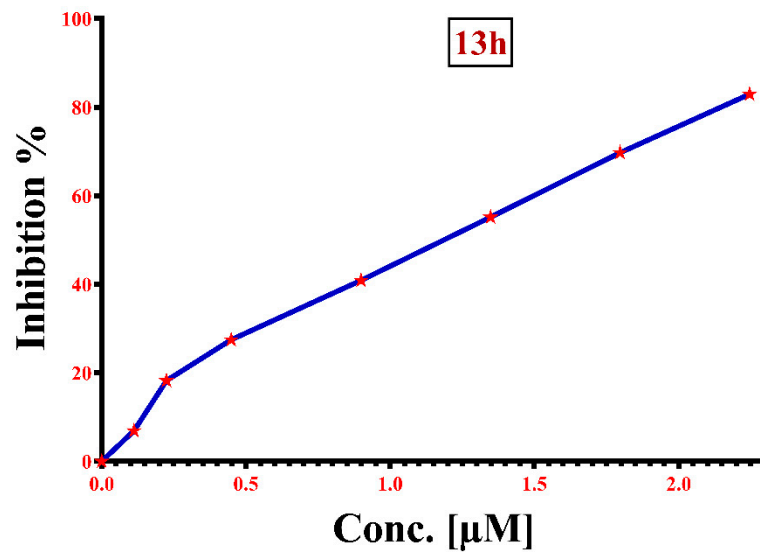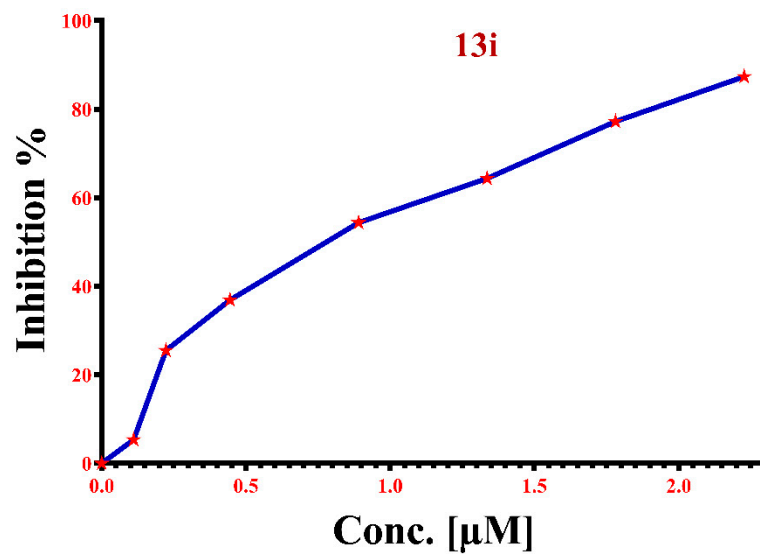

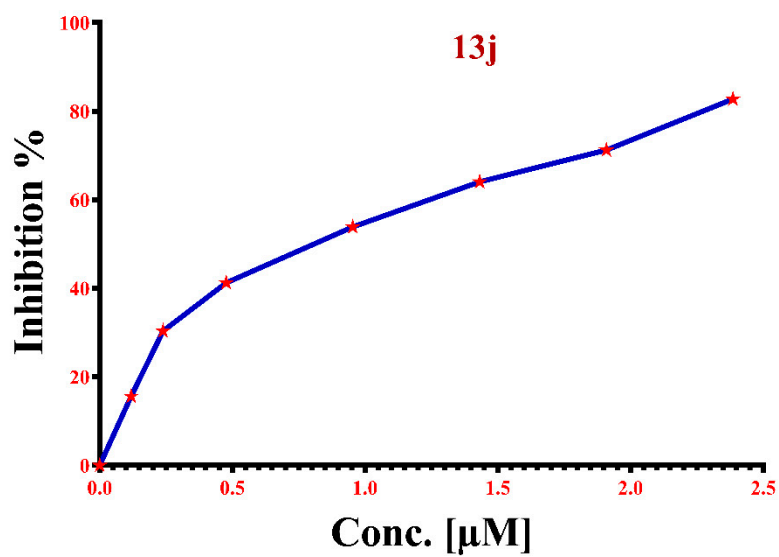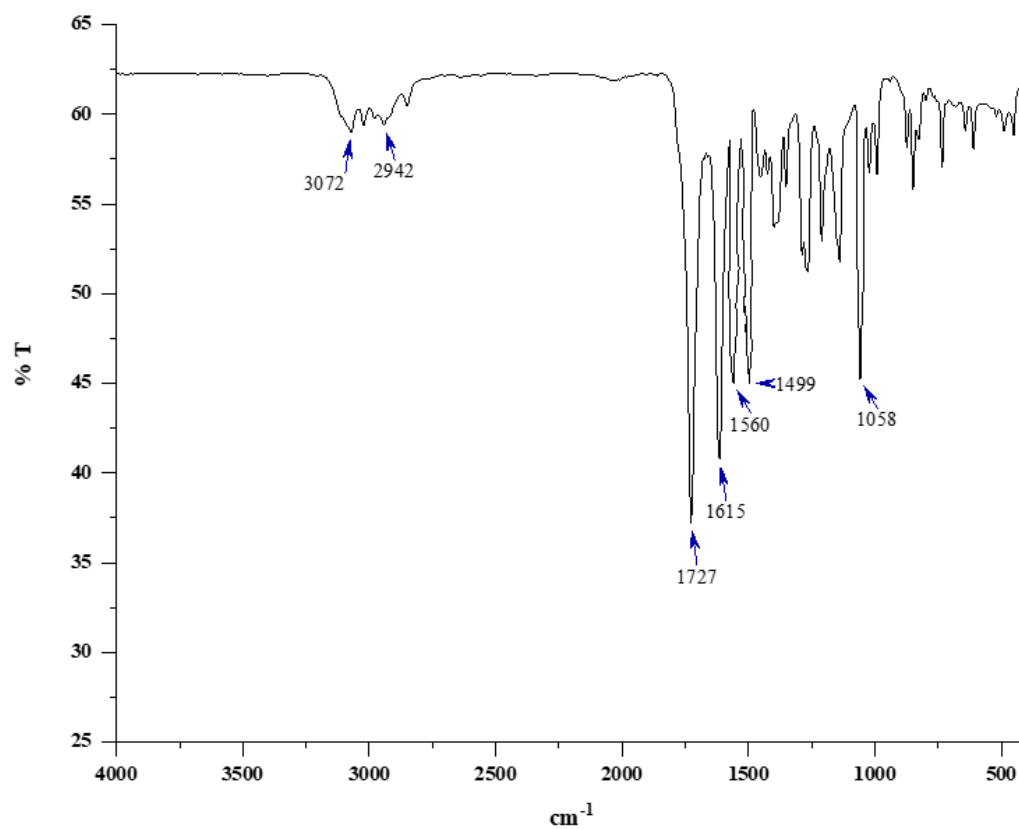

IR spectrum of 4-(chloromethyl)-7-methoxy-2*H*-chromen-2-one (9)

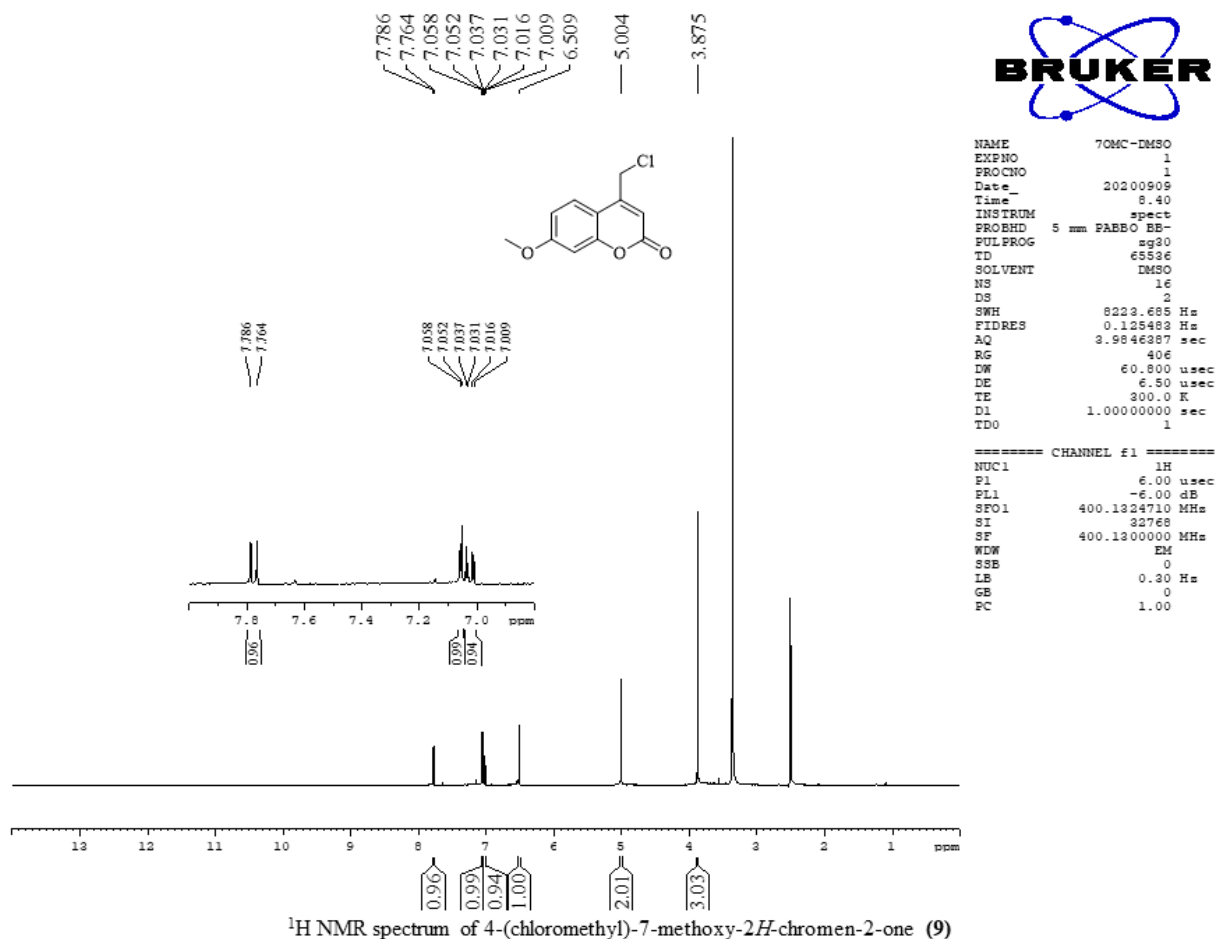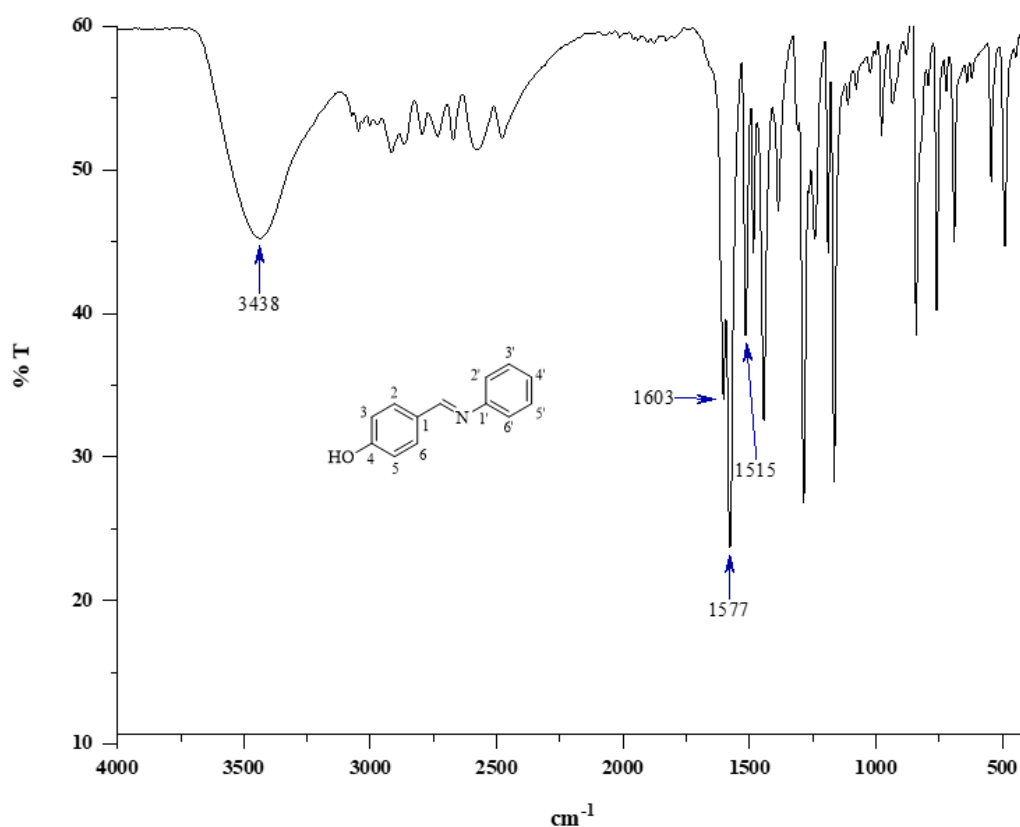

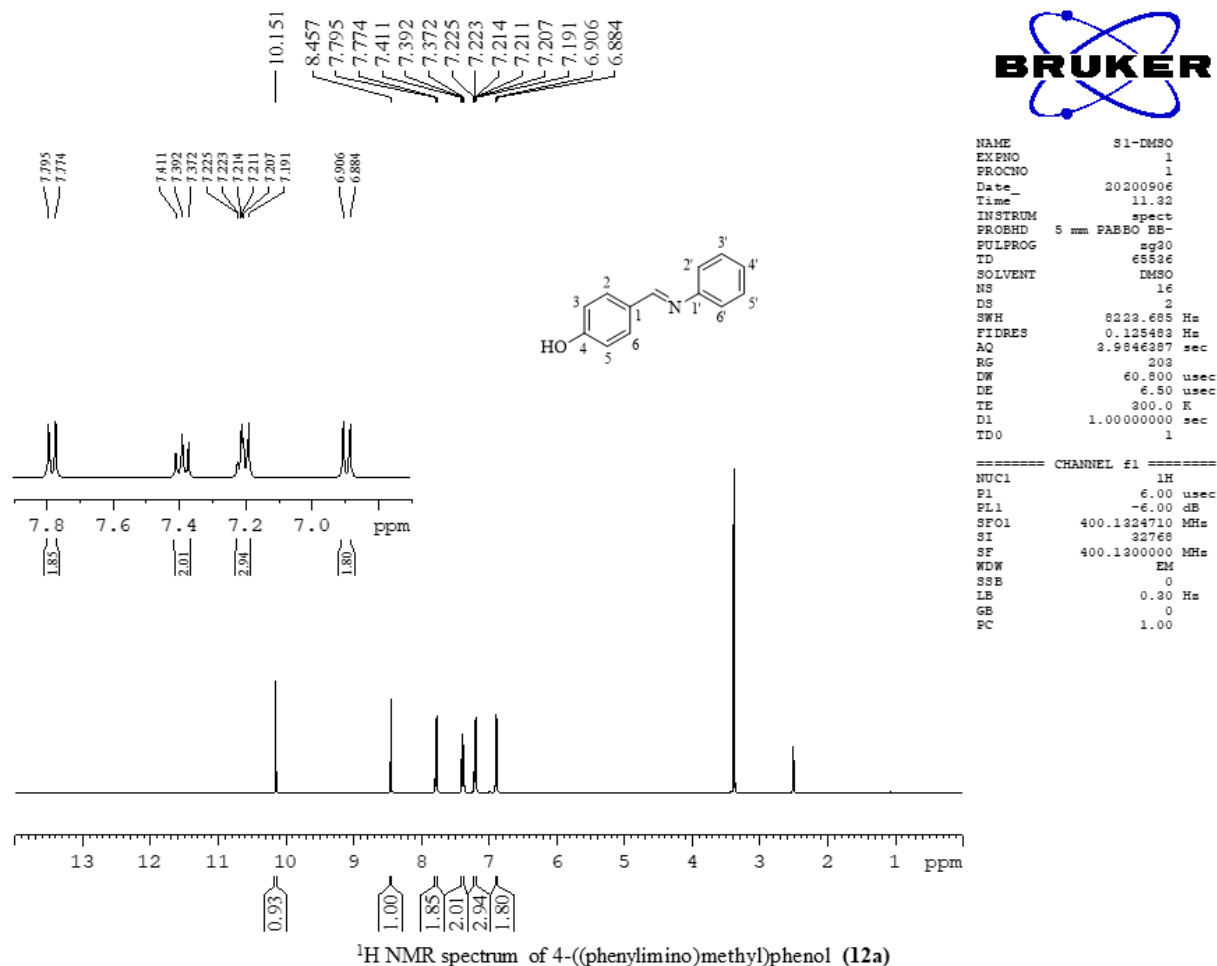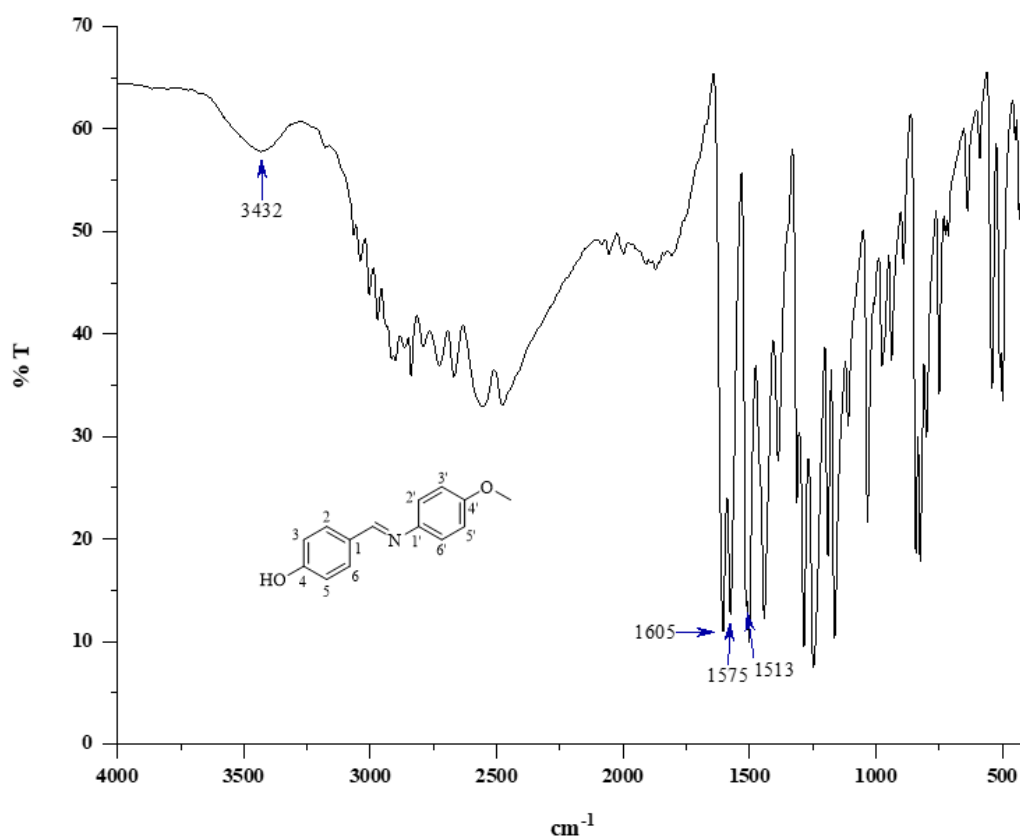

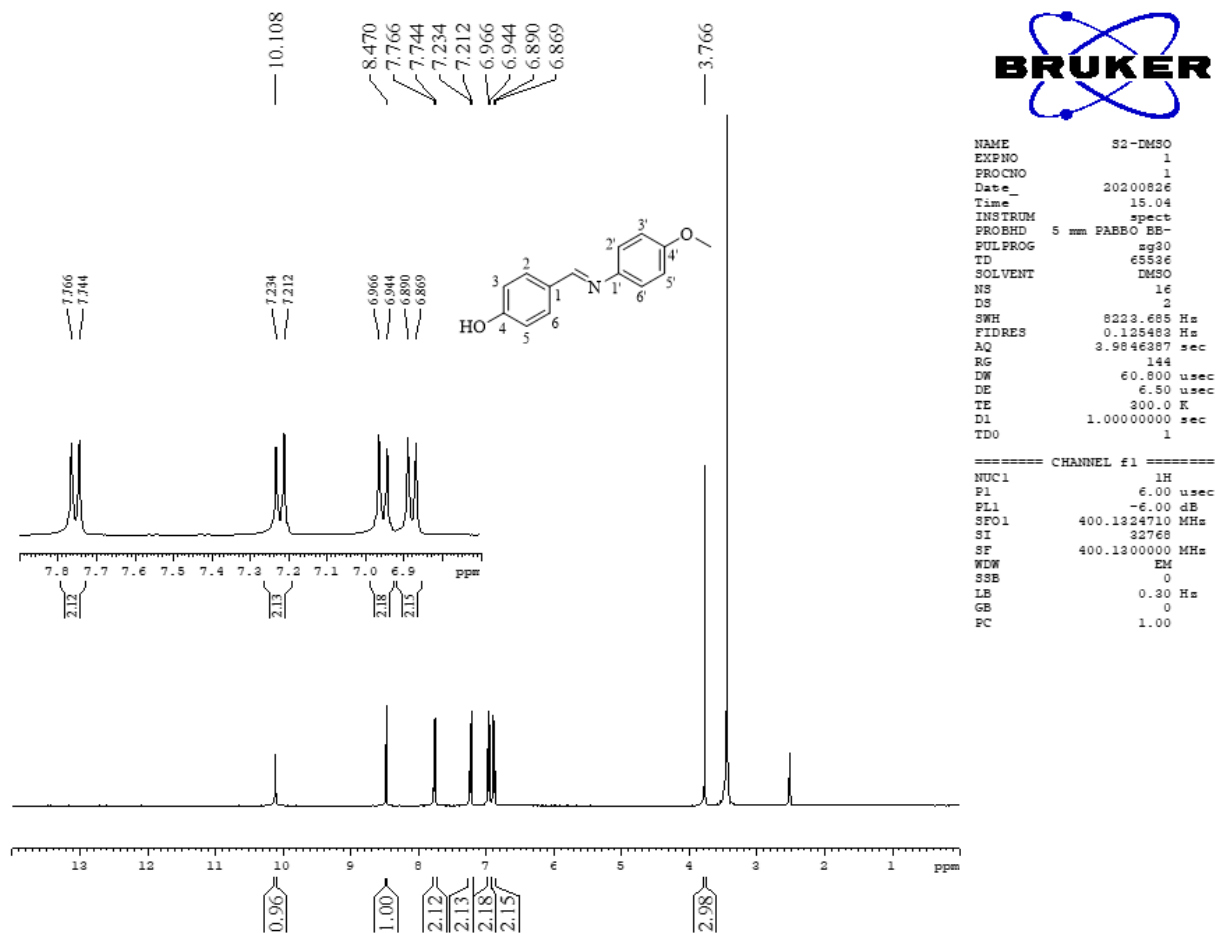

<sup>1</sup>H NMR spectrum of *(E)*-4-(((4-methoxyphenyl)imino)methyl)phenol (**12b**)

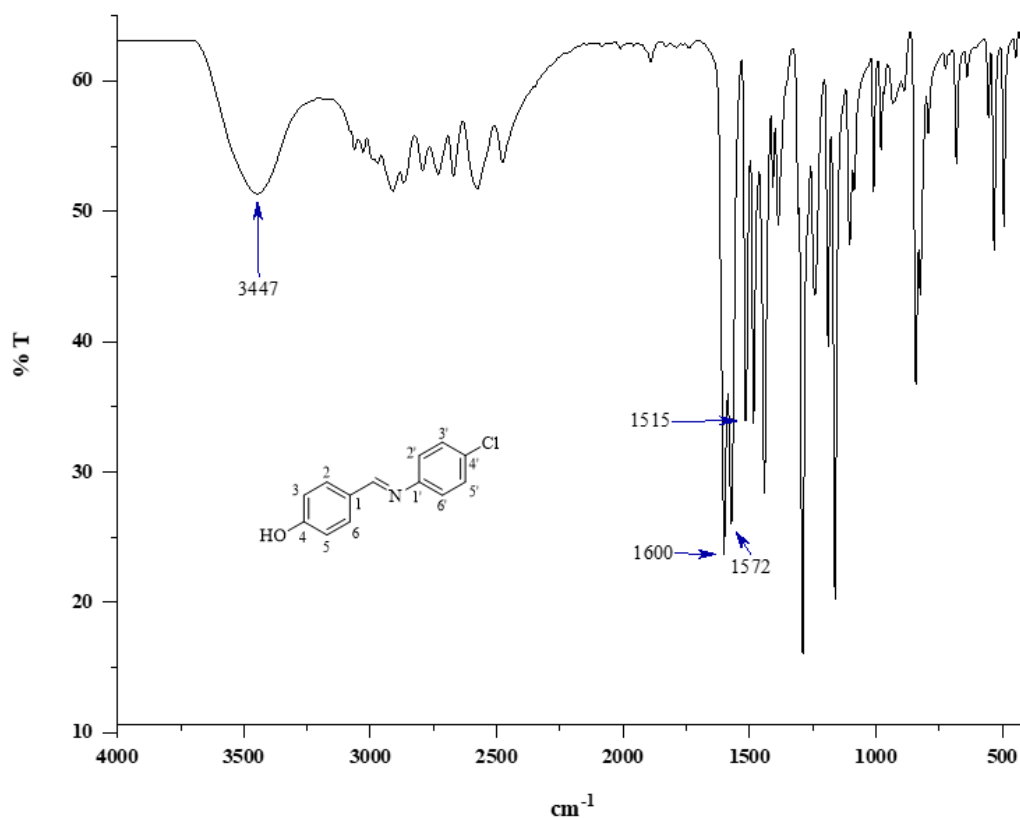

IR spectrum of *(E)*-4-(((4-chlorophenyl)imino)methyl)phenol (**12c**)



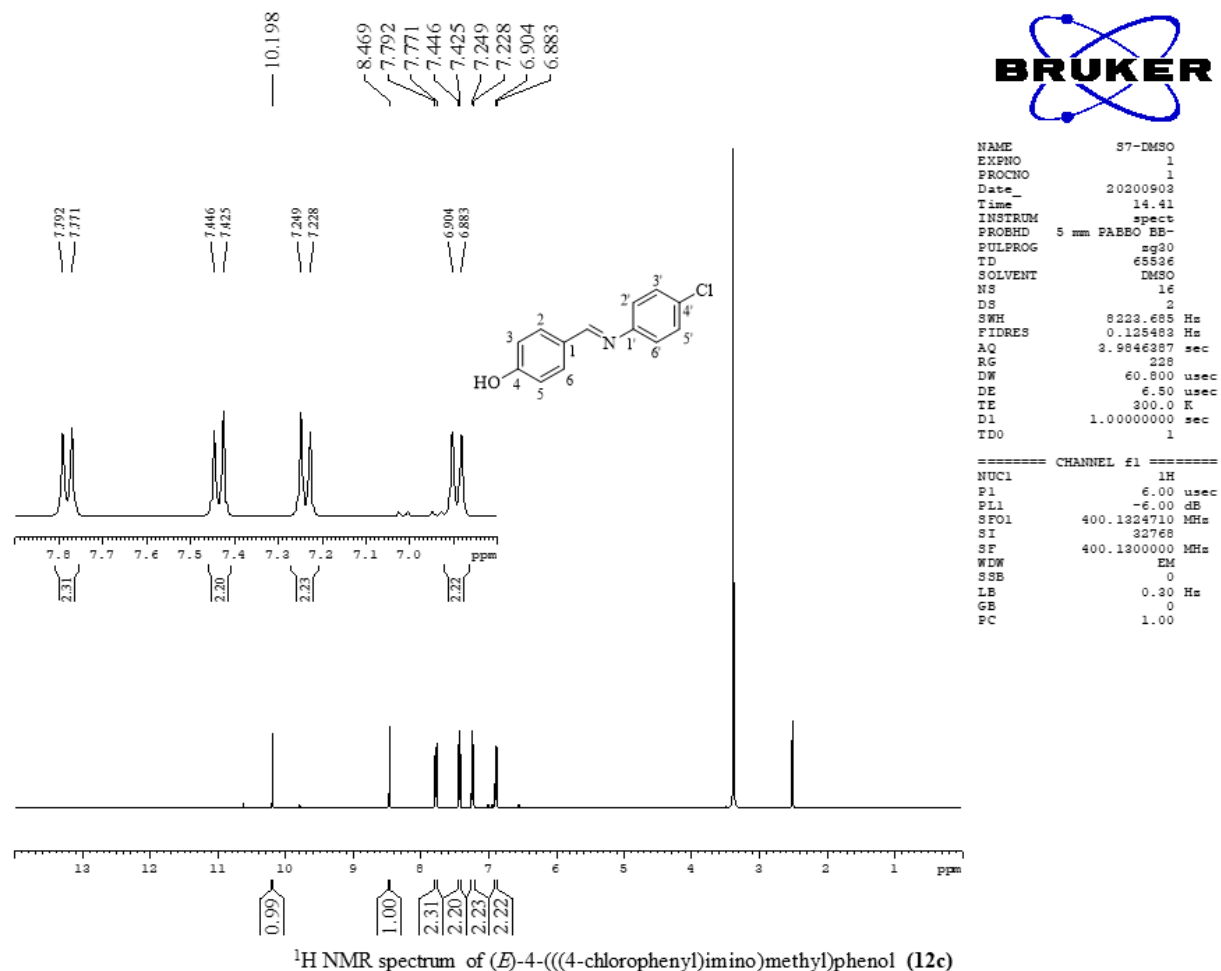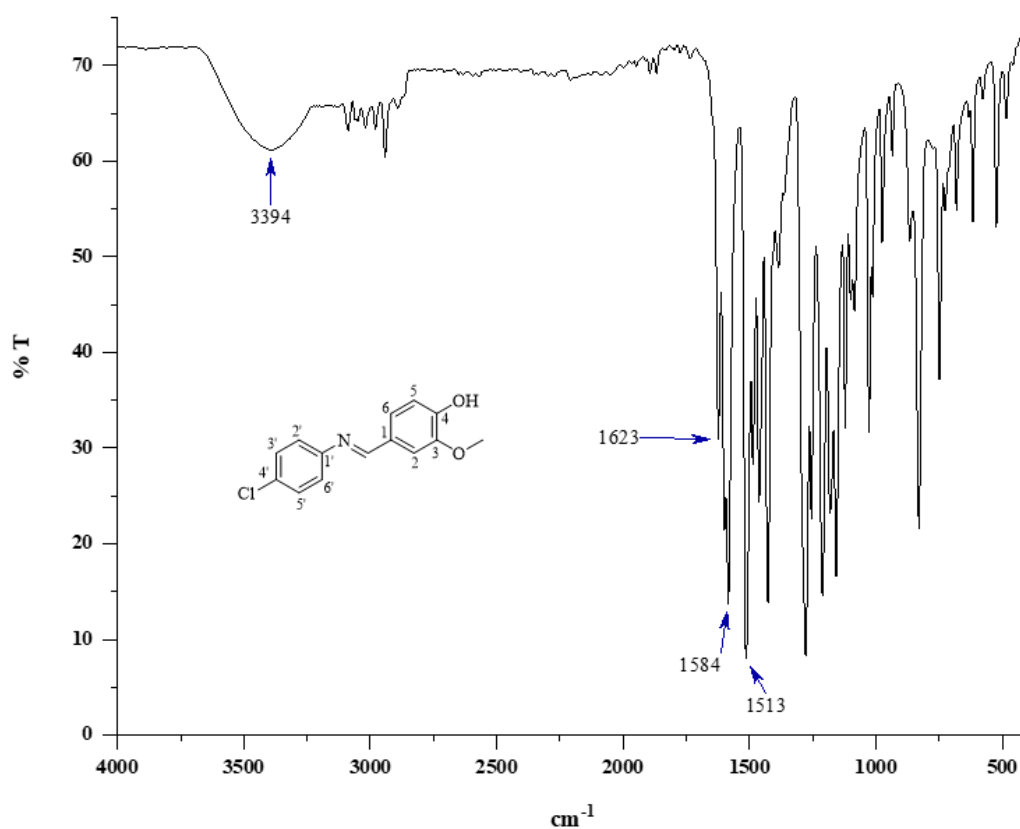

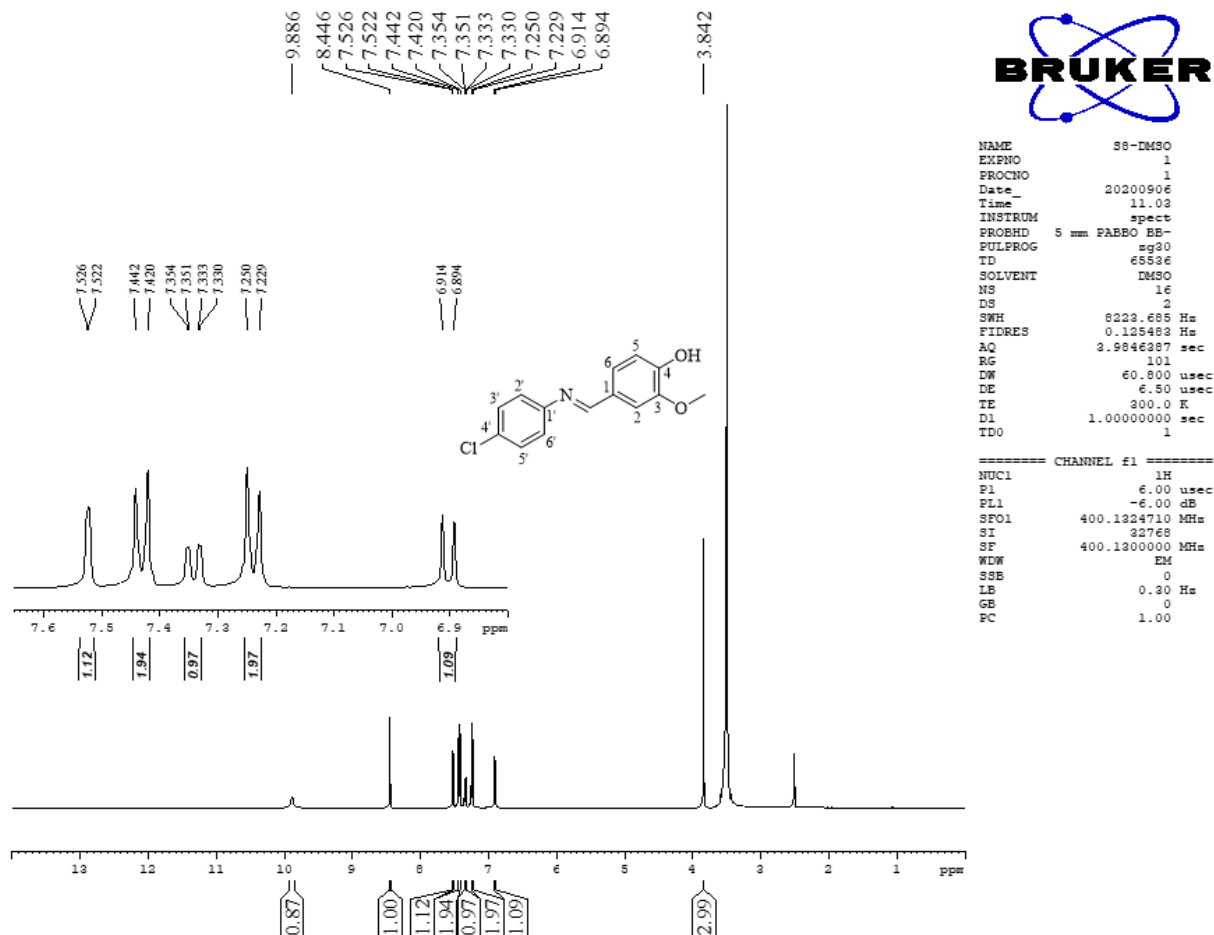

<sup>1</sup>H NMR spectrum of (*E*)-4-(((4-chlorophenyl)imino)methyl)-2-methoxyphenol (**12d**)

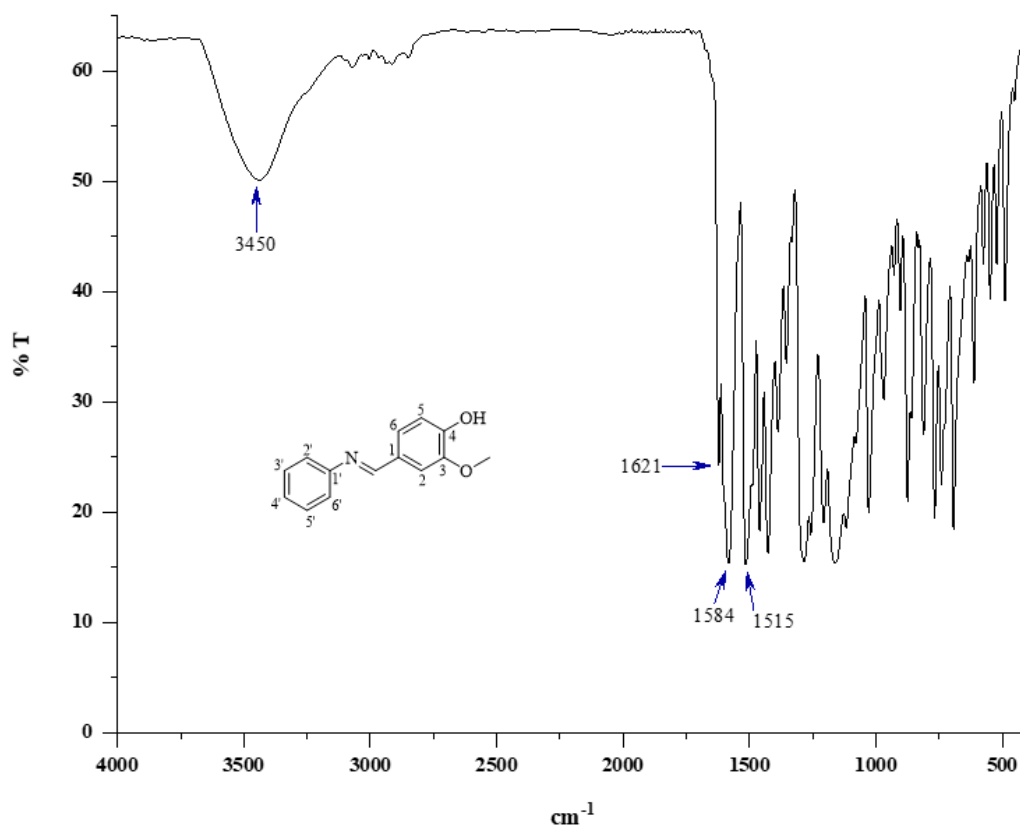

IR spectrum of (*E*)-2-methoxy-4-((phenylimino)methyl)phenol (**12e**)

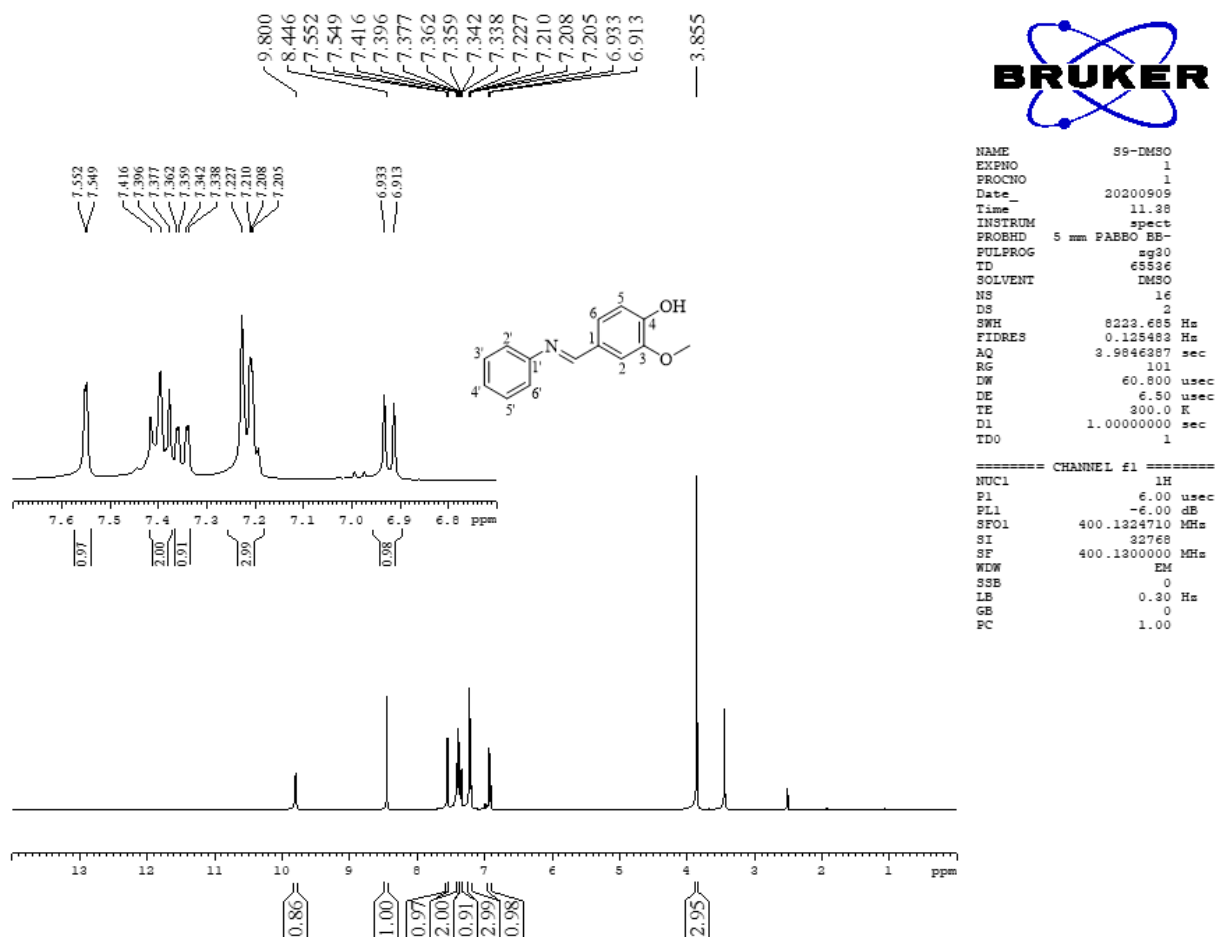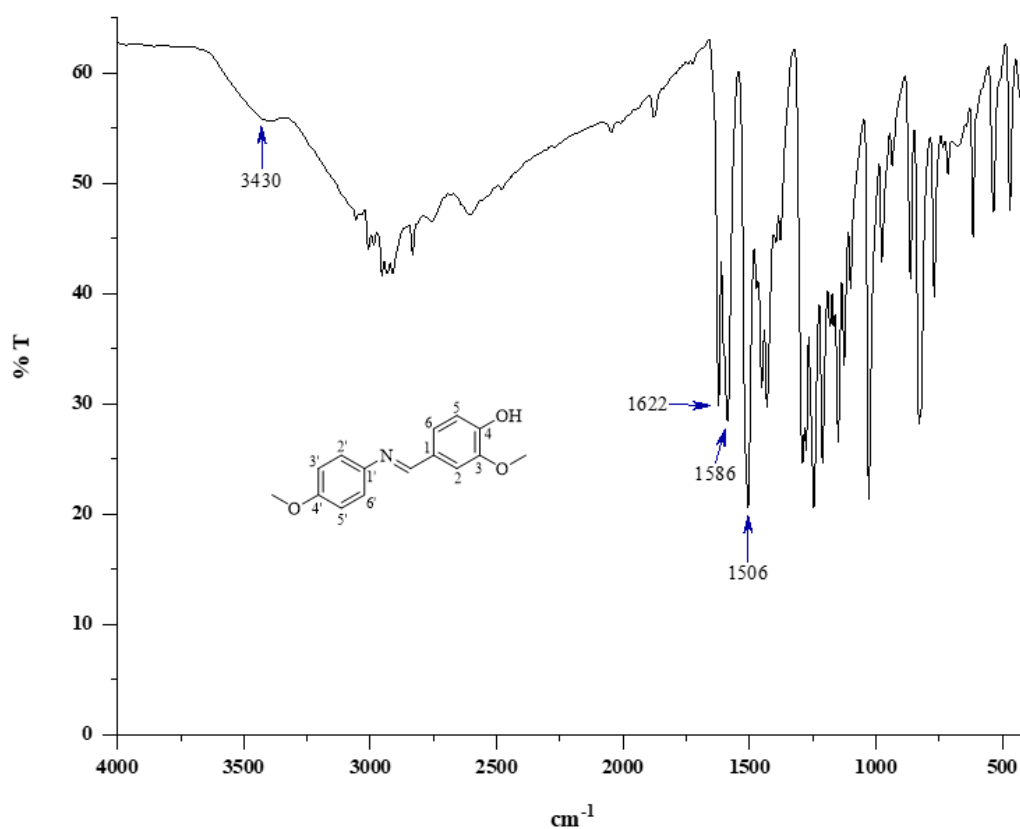

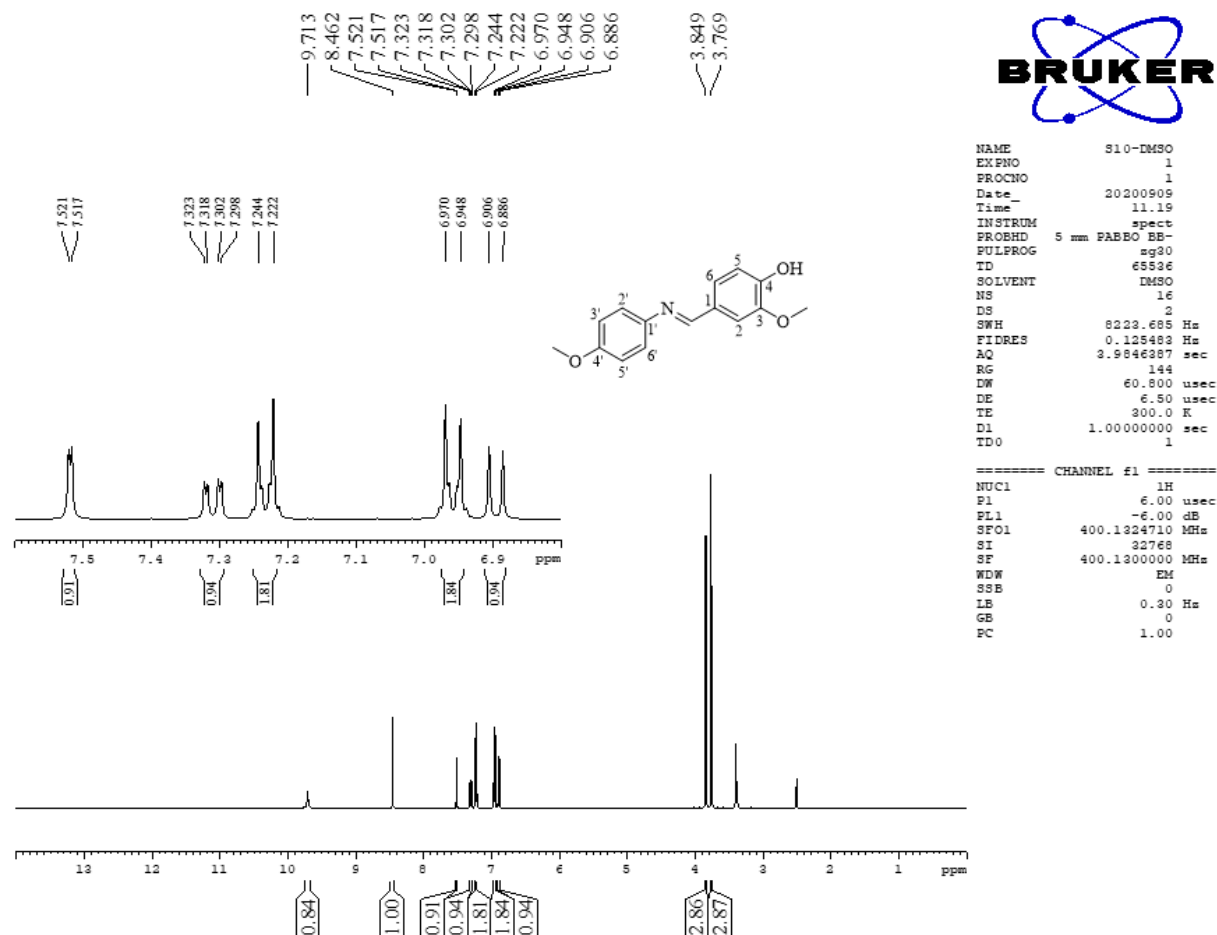

<sup>1</sup>H NMR spectrum of (E)-2-methoxy-4-(((4-methoxyphenyl)imino)methyl)phenol (12f)

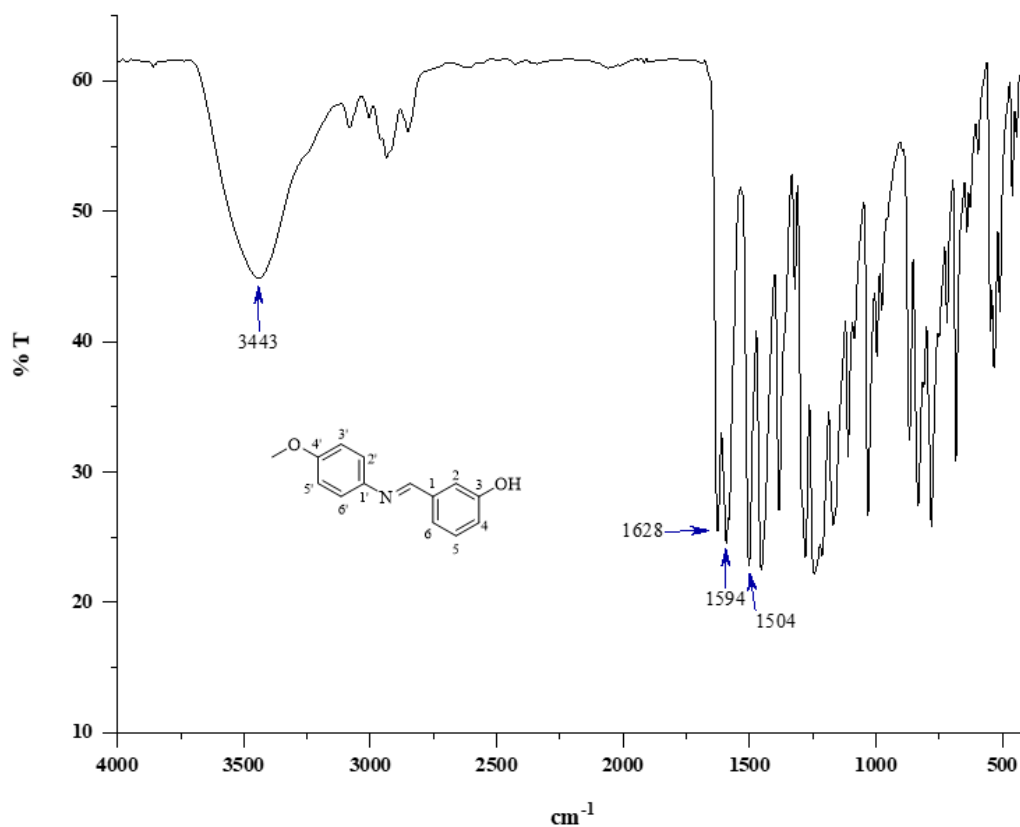

IR spectrum of (E)-3-(((4-methoxyphenyl)imino)methyl)phenol (12g)

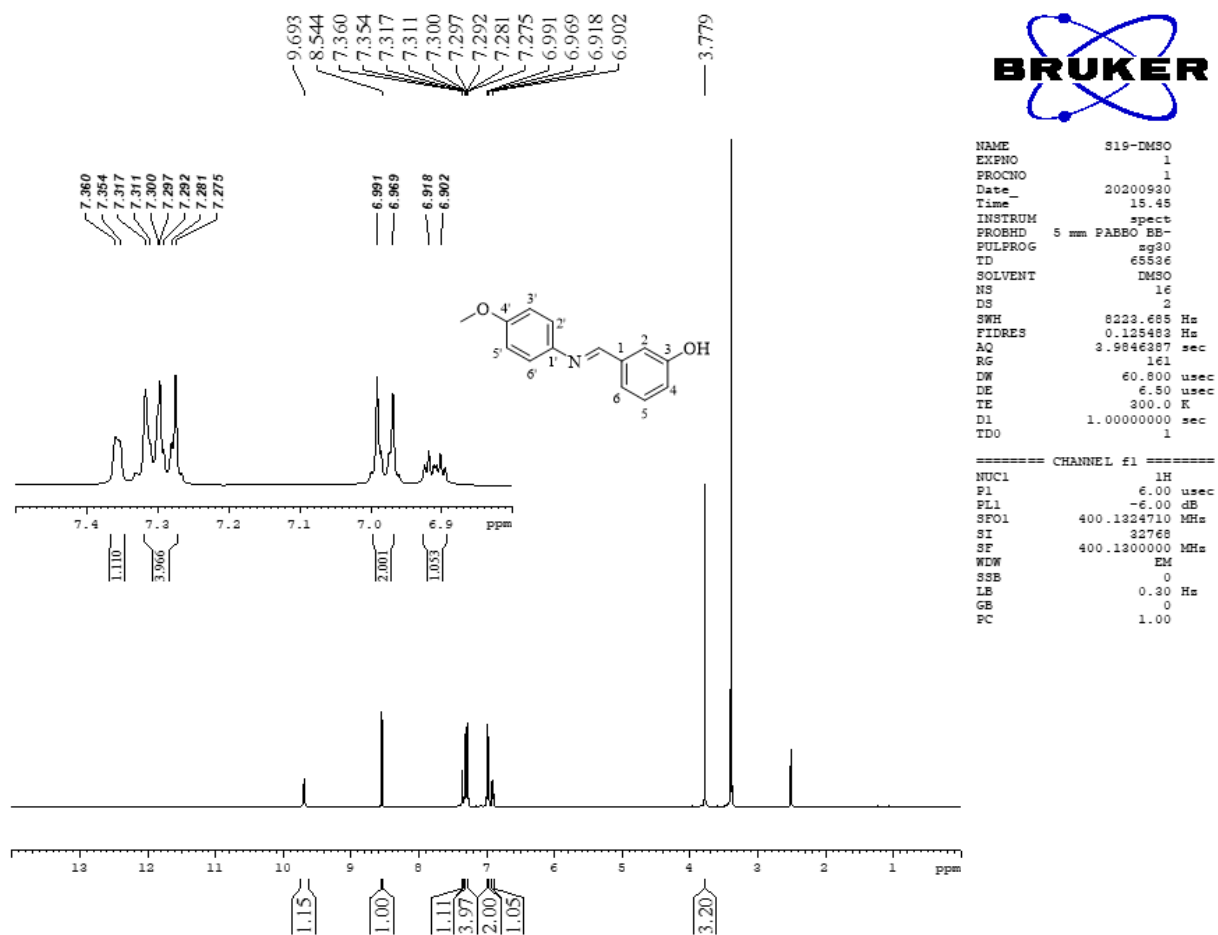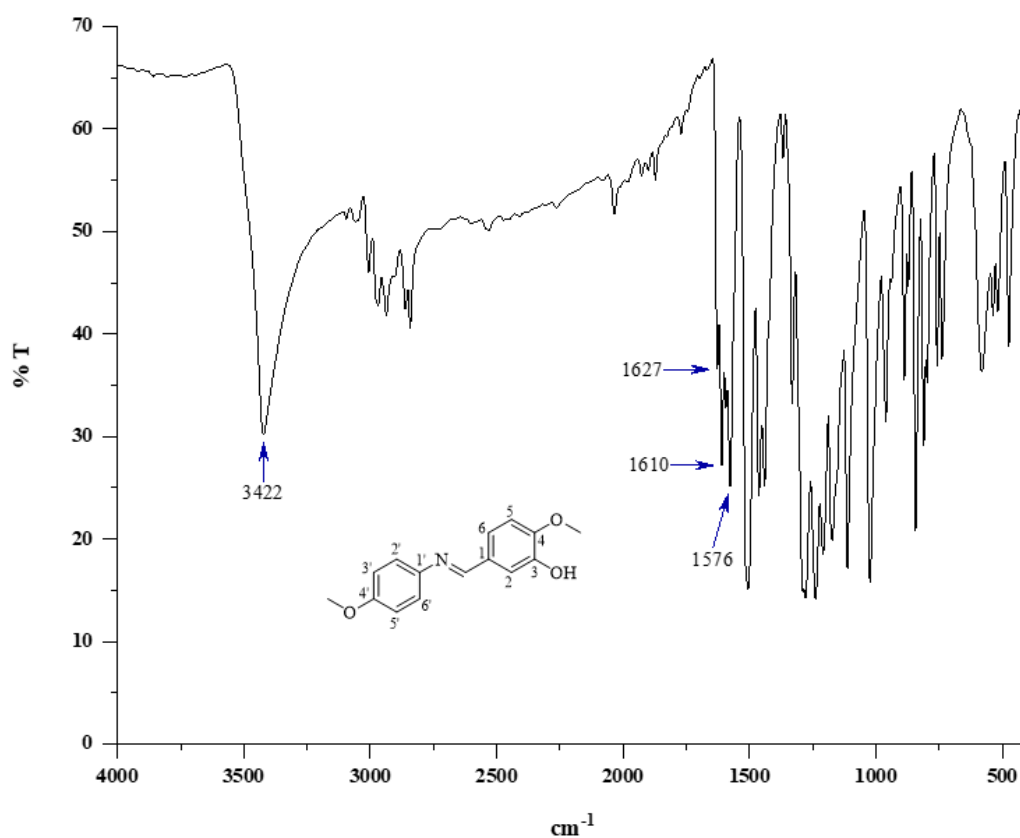

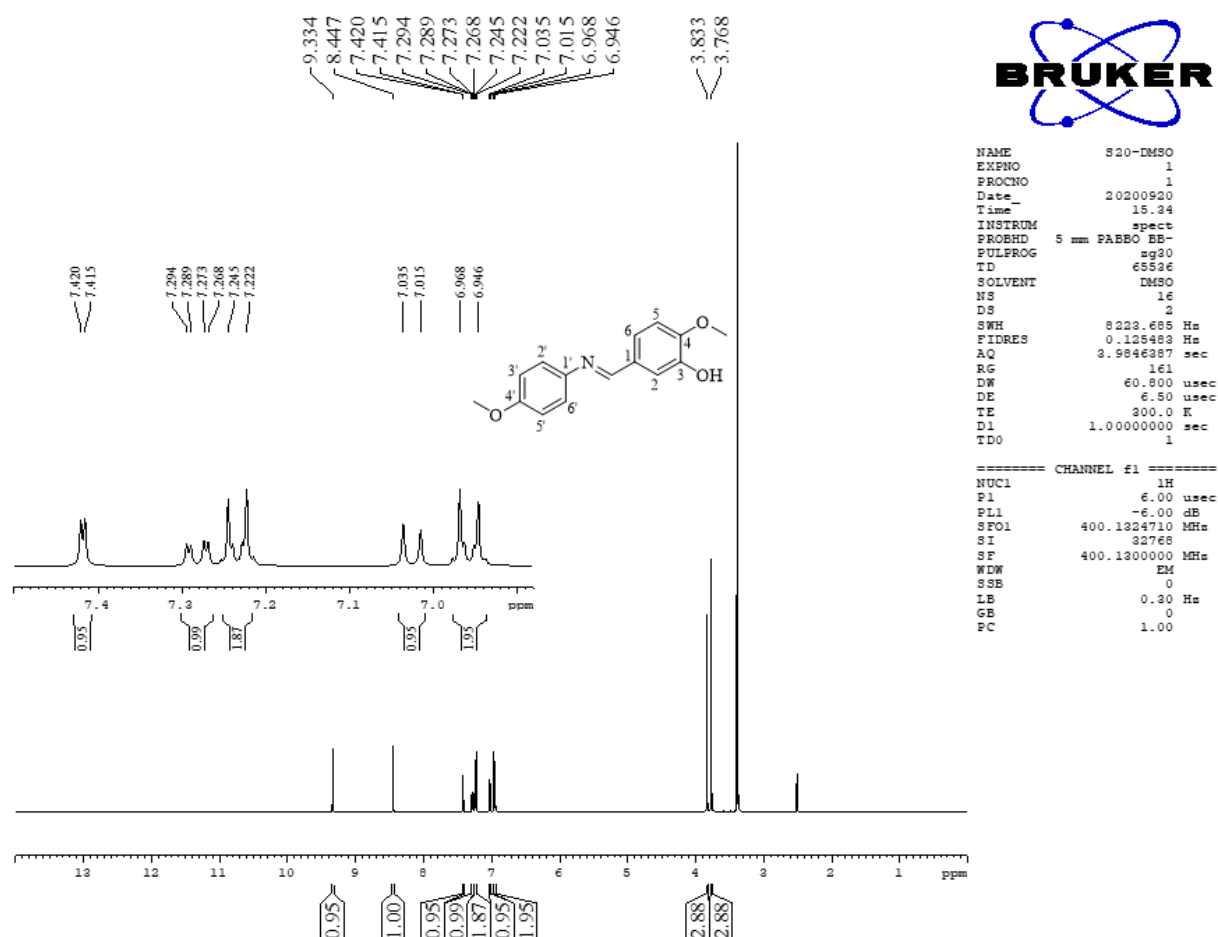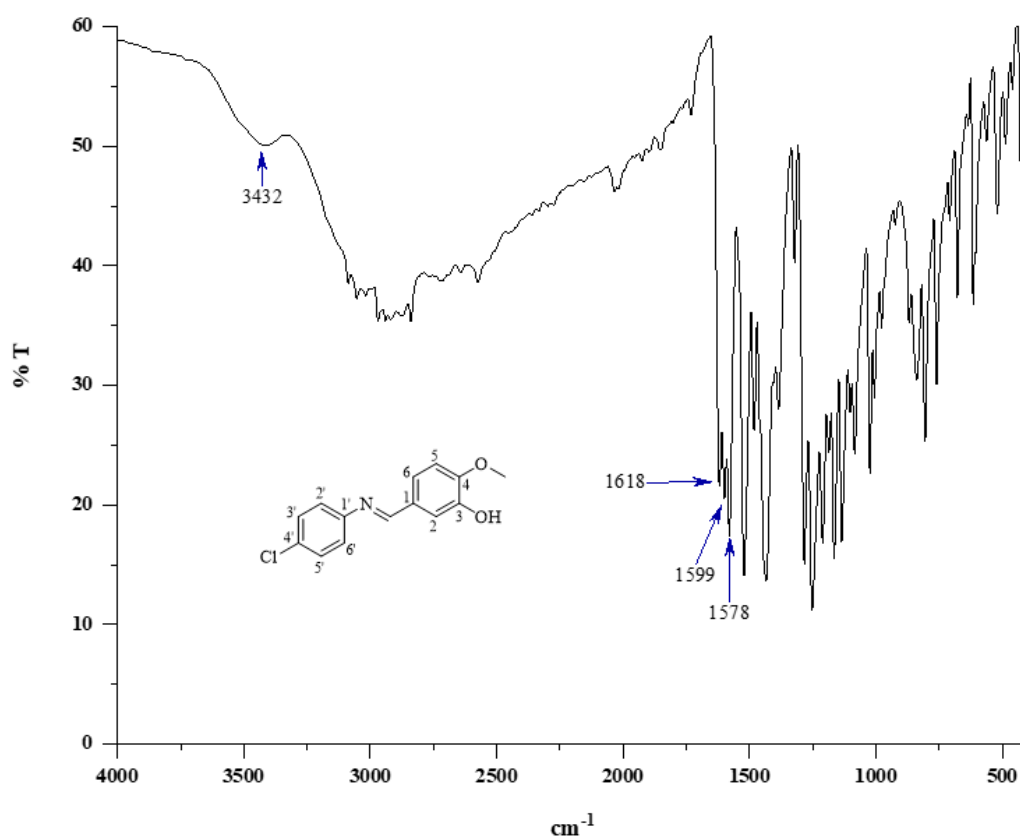

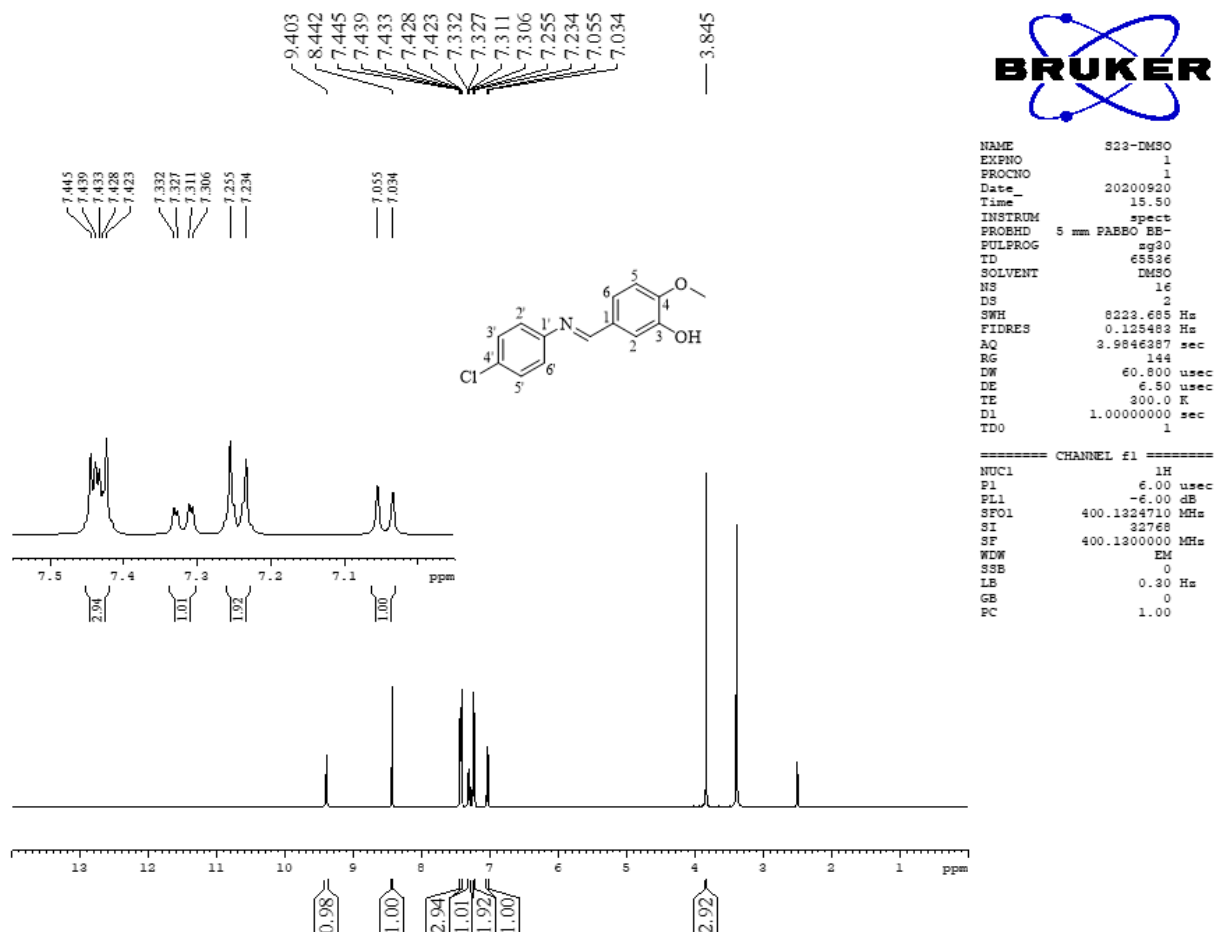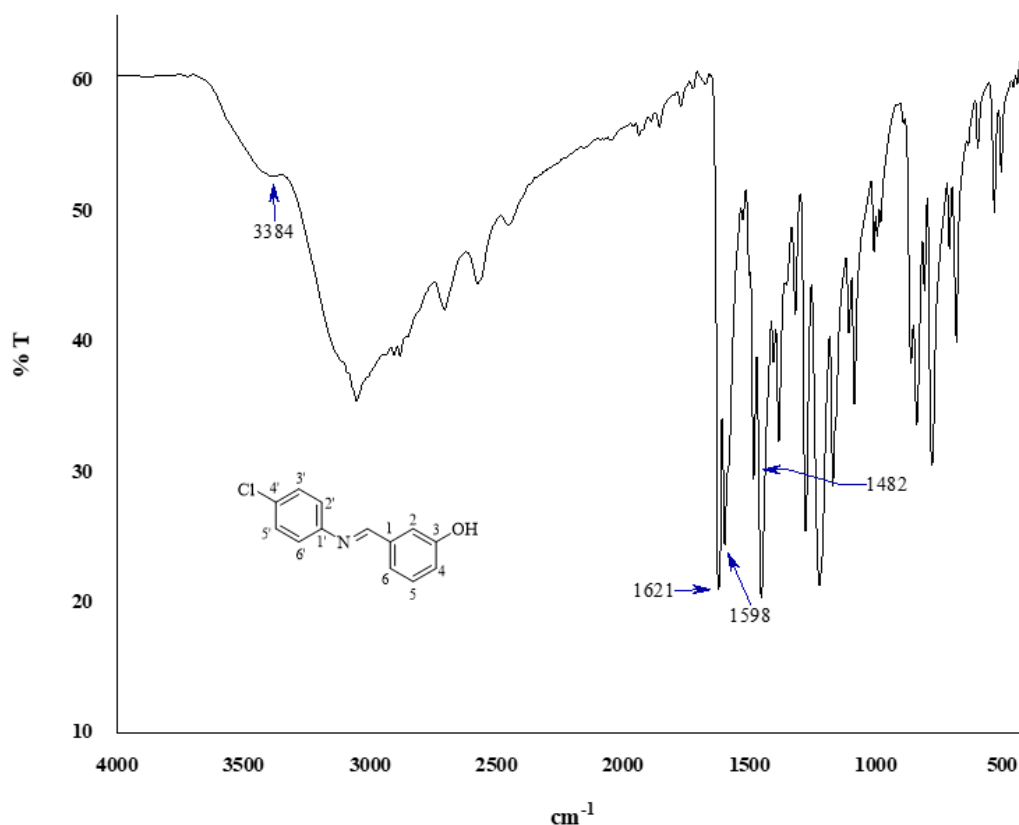

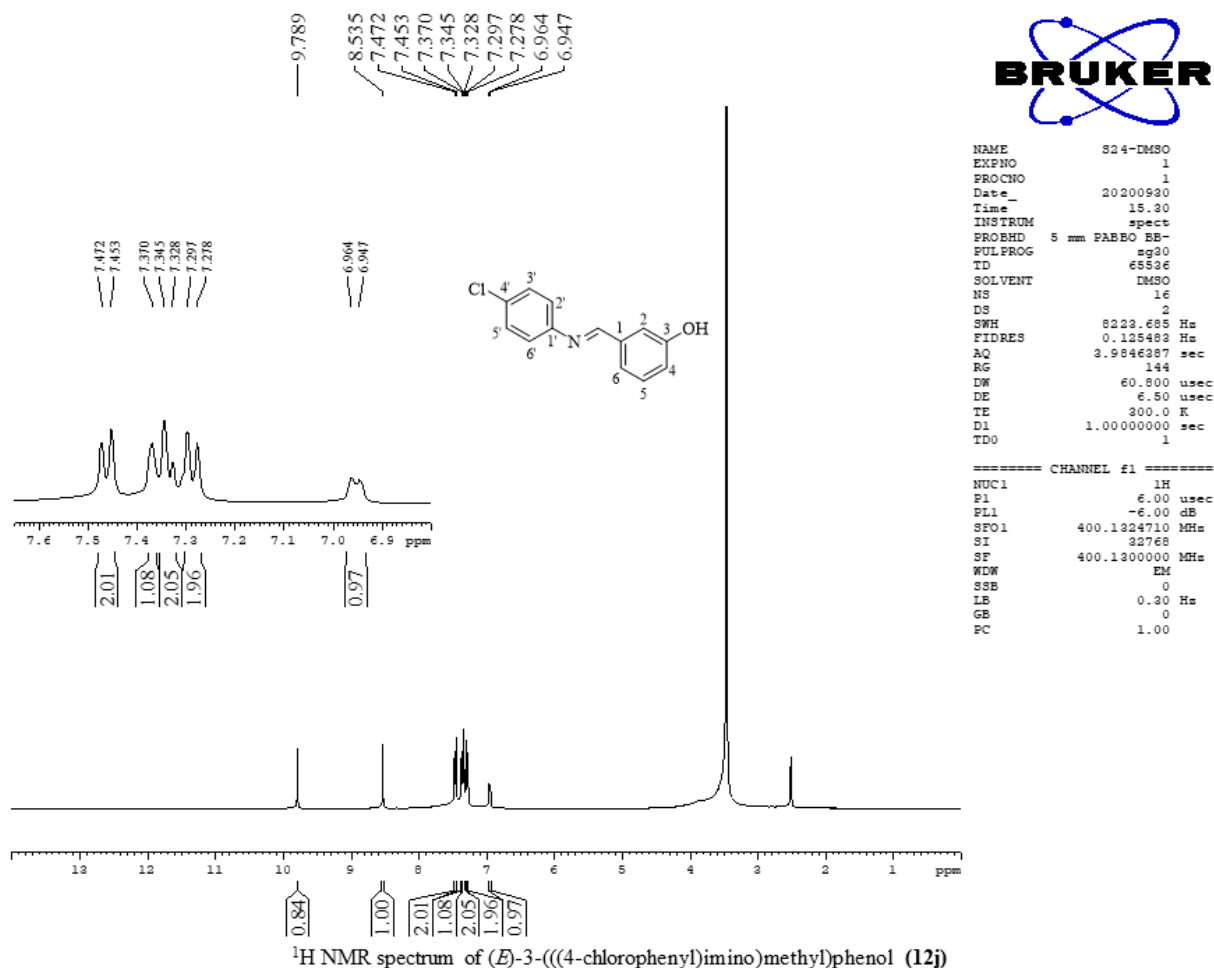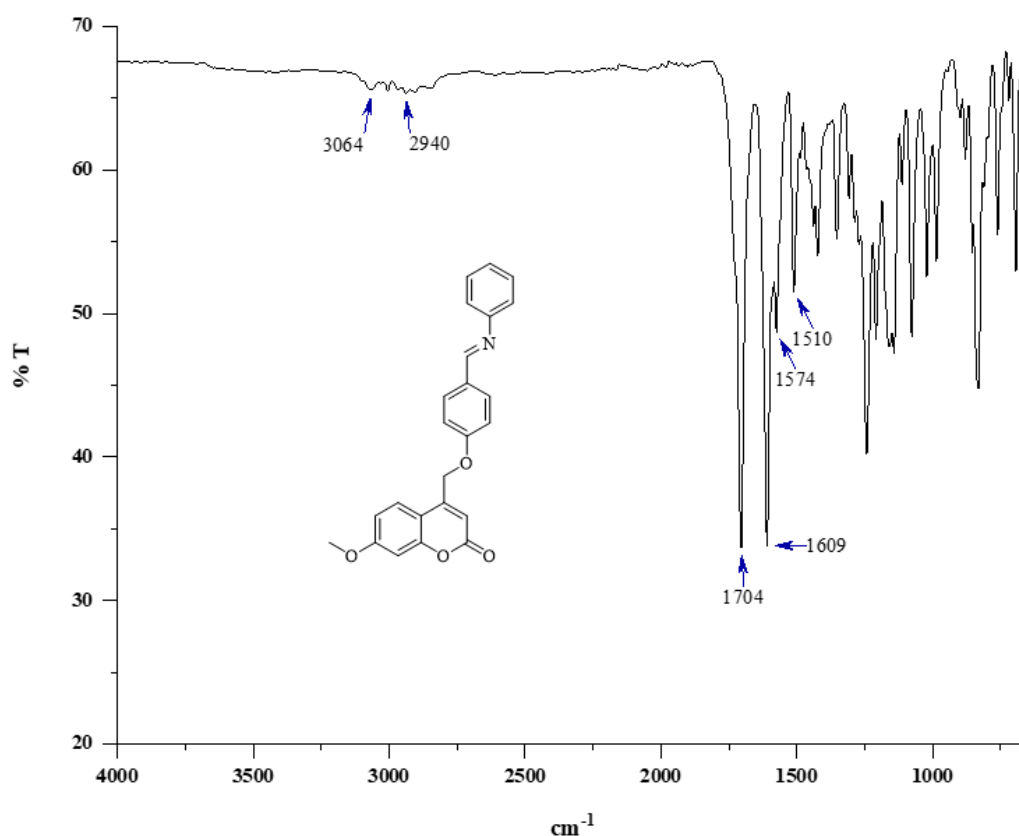



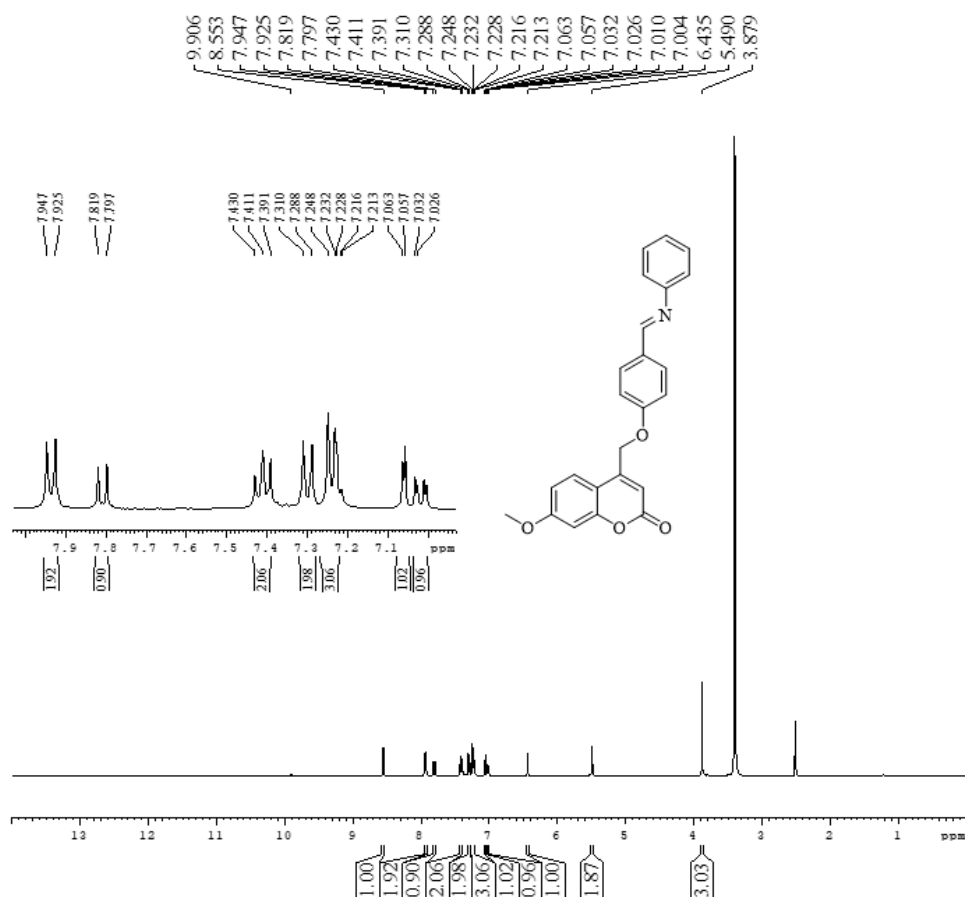

<sup>1</sup>H NMR spectrum of (E)-7-methoxy-4-((4-((phenylimino)methyl)phenoxy)methyl)-2H-chromen-2-one (13a)

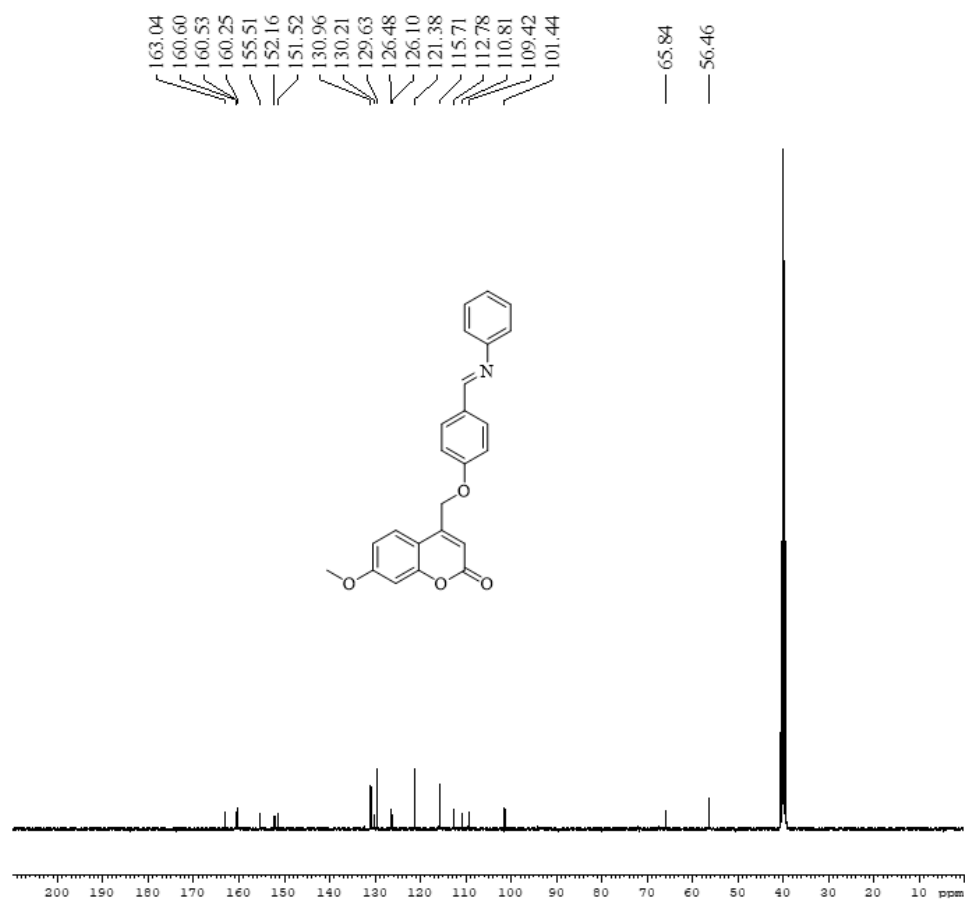

<sup>13</sup>C NMR spectrum of (E)-7-methoxy-4-((4-((phenylimino)methyl)phenoxy)methyl)-2H-chromen-2-one (13a)

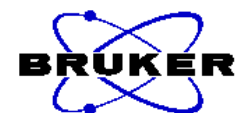

```

NAME      S170MC-DMSO
EXPNO     1
PROCNO    1
Date_     20200909
Time      11.05
INSTRUM   spect
PROBHD    5 mm F4BBO BB-
PULPROG   zg30
TD         65536
SOLVENT   DMSO
NS         16
DS         2
SWH        8223.685 Hz
FIDRES     0.125483 Hz
AQ         3.9846387 sec
RG         181
DW         60.800 usec
DE         6.50 usec
TE         300.0 K
D1         1.00000000 sec
TD0        1

===== CHANNEL f1 =====
NUC1       1H
P1         6.00 usec
PL1        -6.00 dB
SFO1       400.1324710 MHz
SI         32768
SF         400.1300000 MHz
WDW        EM
SSB        0
LB         0.30 Hz
GB         0
PC         1.00
  
```

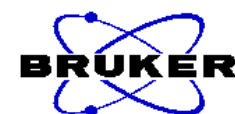

```

NAME      S170MC-DMSO
EXPNO     3
PROCNO    1
Date_     20200909
Time      11.54
INSTRUM   spect
PROBHD    5 mm F4BBO BB-
PULPROG   zgpg30
TD         65536
SOLVENT   DMSO
NS         2048
DS         4
SWH        24038.461 Hz
FIDRES     0.366798 Hz
AQ         1.3621988 sec
RG         203
DW         20.800 usec
DE         6.50 usec
TE         300.0 K
D1         2.00000000 sec
D11        0.03000000 sec
TD0        1

===== CHANNEL f1 =====
NUC1       13C
P1         12.00 usec
PL1        -1.00 dB
SFO1       100.6228299 MHz

===== CHANNEL f2 =====
CPDPRG2   waltz65
NUC2       1H
PCPD2      80.00 usec
PL2        -6.00 dB
PL12       19.50 dB
PL13       19.50 dB
SFO2       400.1316005 MHz
SI         32768
SF         100.6127690 MHz
WDW        EM
SSB        0
LB         1.00 Hz
GB         0
PC         1.40
  
```

Compound Table

| Compound Label                                          | RT    | Mass     | Abund | Formula                                          | Tgt Mass | Diff (ppm) |
|---------------------------------------------------------|-------|----------|-------|--------------------------------------------------|----------|------------|
| Cpd 1: C <sub>24</sub> H <sub>19</sub> N O <sub>4</sub> | 0.232 | 385.1312 | 113   | C <sub>24</sub> H <sub>19</sub> N O <sub>4</sub> | 385.1314 | -0.56      |

| Compound Label                                          | <i>m/z</i> | RT    | Algorithm       | Mass     |
|---------------------------------------------------------|------------|-------|-----------------|----------|
| Cpd 1: C <sub>24</sub> H <sub>19</sub> N O <sub>4</sub> | 390.113    | 0.232 | Find By Formula | 385.1312 |

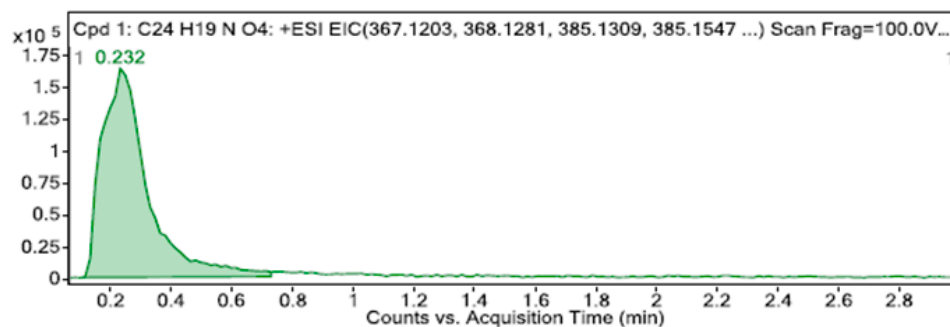

MS Zoomed Spectrum

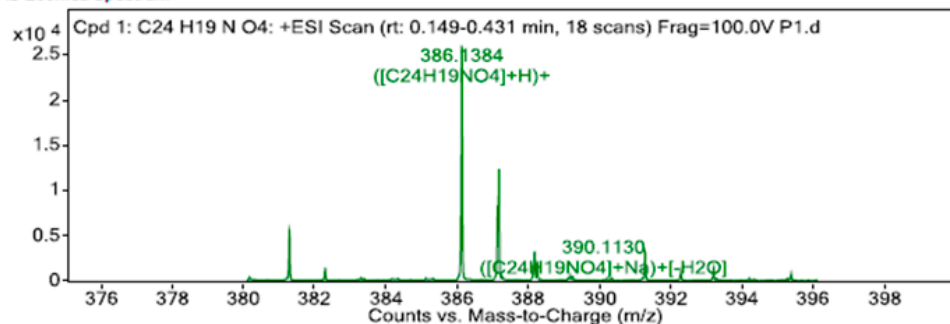HRMS of (*E*)-7-methoxy-4-((4-((phenylimino)methyl)phenoxy)methyl)-2*H*-chromen-2-one (13a)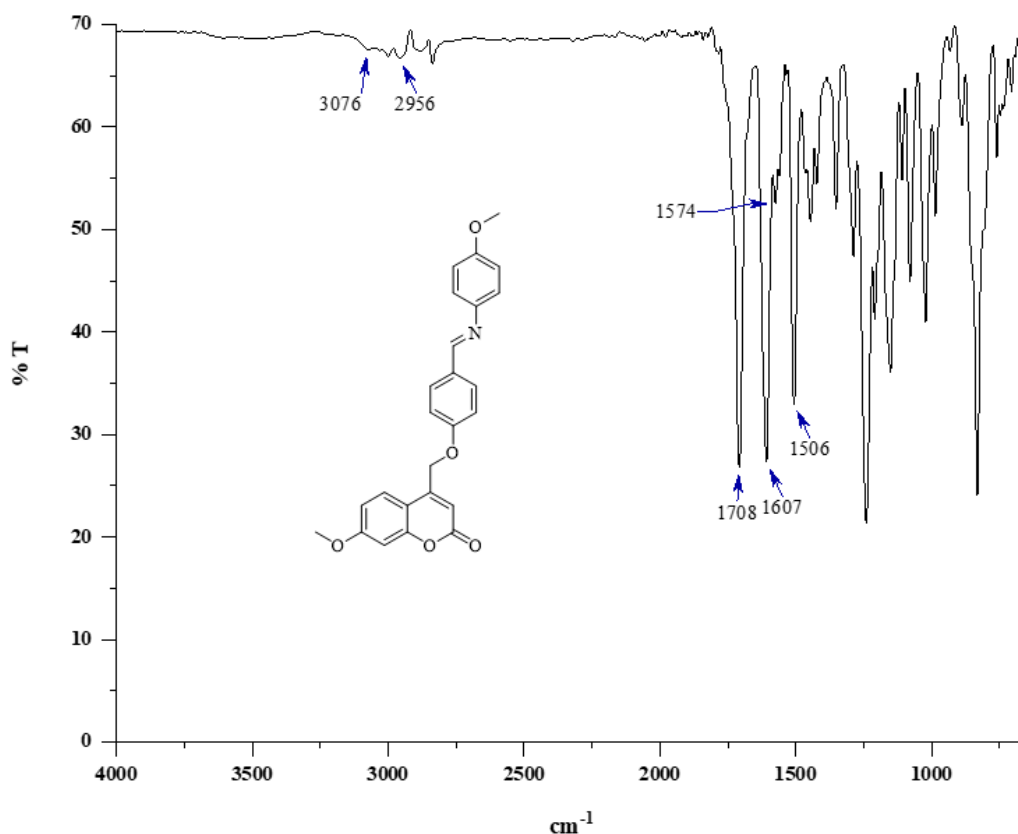IR spectrum of (*E*)-7-methoxy-4-((4-((4-methoxyphenyl)imino)methyl)phenoxy)methyl)-2*H*-chromen-2-one (13b)

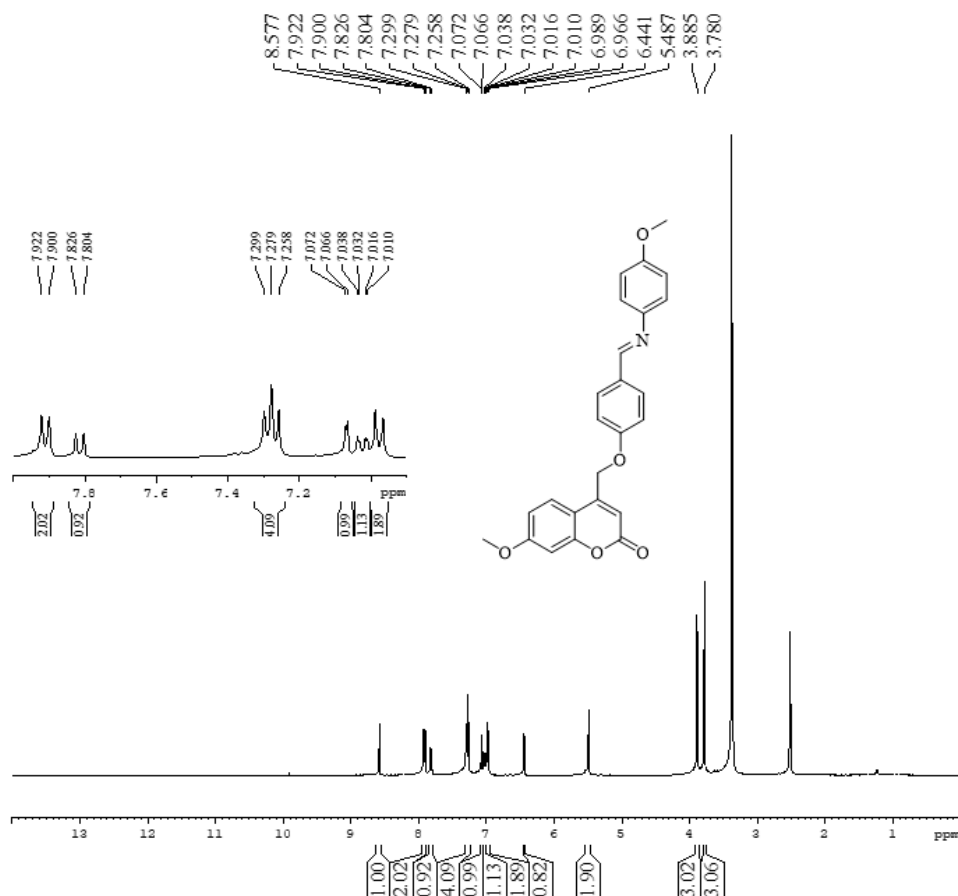

<sup>1</sup>H NMR spectrum of (E)-7-methoxy-4-((4-(((4-methoxyphenyl)imino)methyl)phenoxy)methyl)-2H-chromen-2-one (13b)

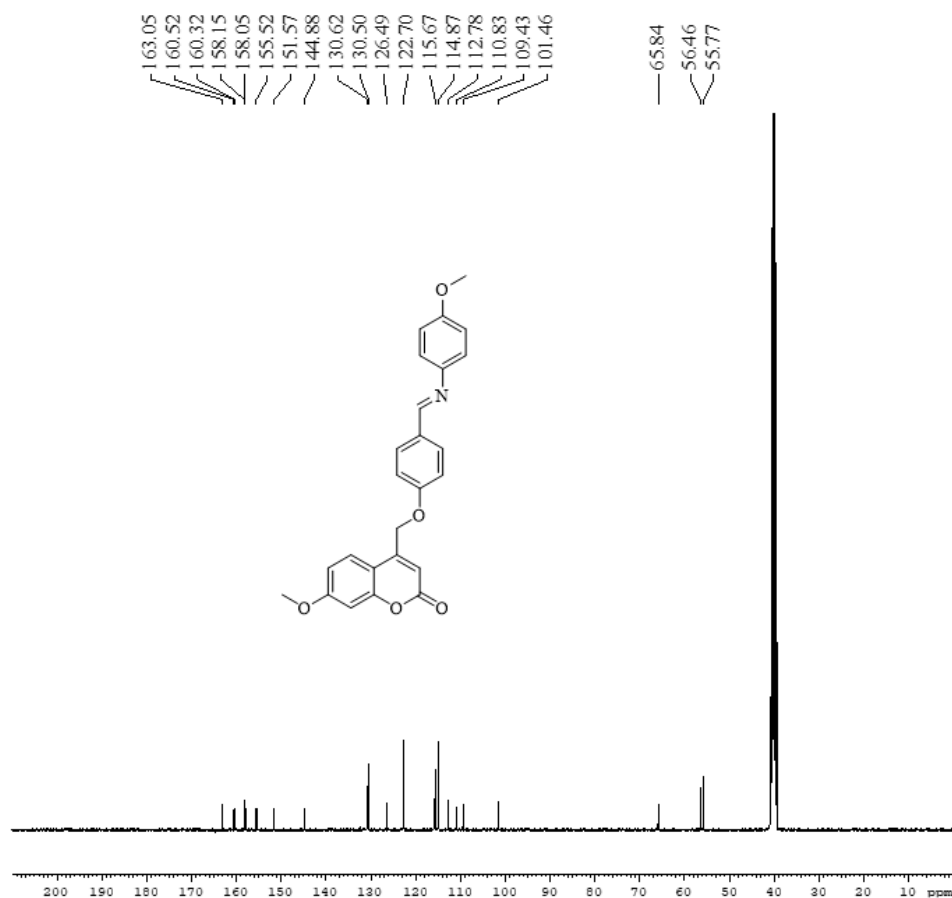

<sup>13</sup>C NMR spectrum of (E)-7-methoxy-4-((4-(((4-methoxyphenyl)imino)methyl)phenoxy)methyl)-2H-chromen-2-one (13b)

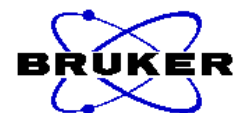

```

NAME      S270MC-DMSO
EXPNO     1
PROCNO    1
Date_     20200917
Time      12.14
INSTRUM   spect
PROBHD    5 mm PABBO BB-
PULPROG   sg20
TD         65536
SOLVENT   DMSO
NS         16
DS         2
SWH        8223.685 Hz
FIDRES     0.125488 Hz
AQ          3.9846287 sec
RG          228
DW          60.800 usec
DE           6.50 usec
TE          300.0 K
D1          1.00000000 sec
TD0         1

===== CHANNEL f1 =====
NUC1       1H
P1          6.00 usec
PL1         -6.00 dB
SFO1       400.1324710 MHz
SI          32768
SF          400.1300000 MHz
WDW         EM
SSB         0
LB          0.30 Hz
GB          0
PC          1.00

```

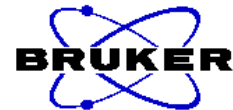

```

NAME      S270MC-DMSO
EXPNO     2
PROCNO    1
Date_     20200917
Time      12.29
INSTRUM   spect
PROBHD    5 mm PABBO BB-
PULPROG   sgpg30
TD         65536
SOLVENT   DMSO
NS         15260
DS         4
SWH        24038.461 Hz
FIDRES     0.366798 Hz
AQ          1.3631988 sec
RG          203
DW          20.800 usec
DE           6.50 usec
TE          300.0 K
D1          2.00000000 sec
D11         0.03000000 sec
TD0         1

===== CHANNEL f1 =====
NUC1       13C
P1          12.00 usec
PL1         -1.00 dB
SFO1       100.6228298 MHz

===== CHANNEL f2 =====
CPDPRG2    waltz65
NUC2       1H
PCPD2      80.00 usec
PL2         -6.00 dB
PL12        19.50 dB
PL13        19.50 dB
SFO2       400.1316005 MHz
SI          32768
SF          100.6127690 MHz
WDW         EM
SSB         0
LB          1.00 Hz
GB          0
PC          1.40

```

Compound Table

| Compound Label                                          | RT    | Mass     | Abund  | Formula                                          | Tgt Mass | Diff (ppm) |
|---------------------------------------------------------|-------|----------|--------|--------------------------------------------------|----------|------------|
| Cpd 1: C <sub>25</sub> H <sub>21</sub> N O <sub>5</sub> | 0.198 | 415.1424 | 432183 | C <sub>25</sub> H <sub>21</sub> N O <sub>5</sub> | 415.142  | 1.13       |

| Compound Label                                          | m/z      | RT    | Algorithm       | Mass     |
|---------------------------------------------------------|----------|-------|-----------------|----------|
| Cpd 1: C <sub>25</sub> H <sub>21</sub> N O <sub>5</sub> | 416.1498 | 0.198 | Find By Formula | 415.1424 |

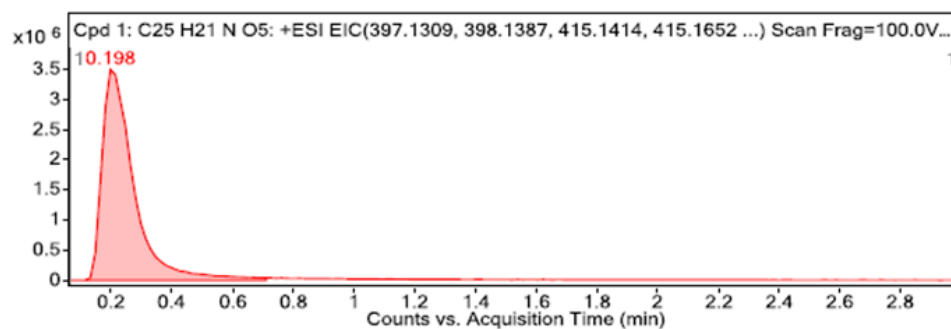

MS Zoomed Spectrum

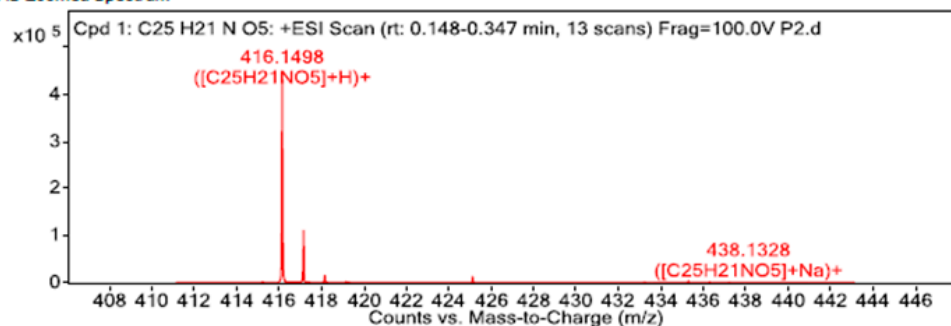

HRMS of (*E*)-7-methoxy-4-((4-(((4-methoxyphenyl)imino)methyl) phenoxy)methyl)-2*H*-chromen-2-one (**13b**)

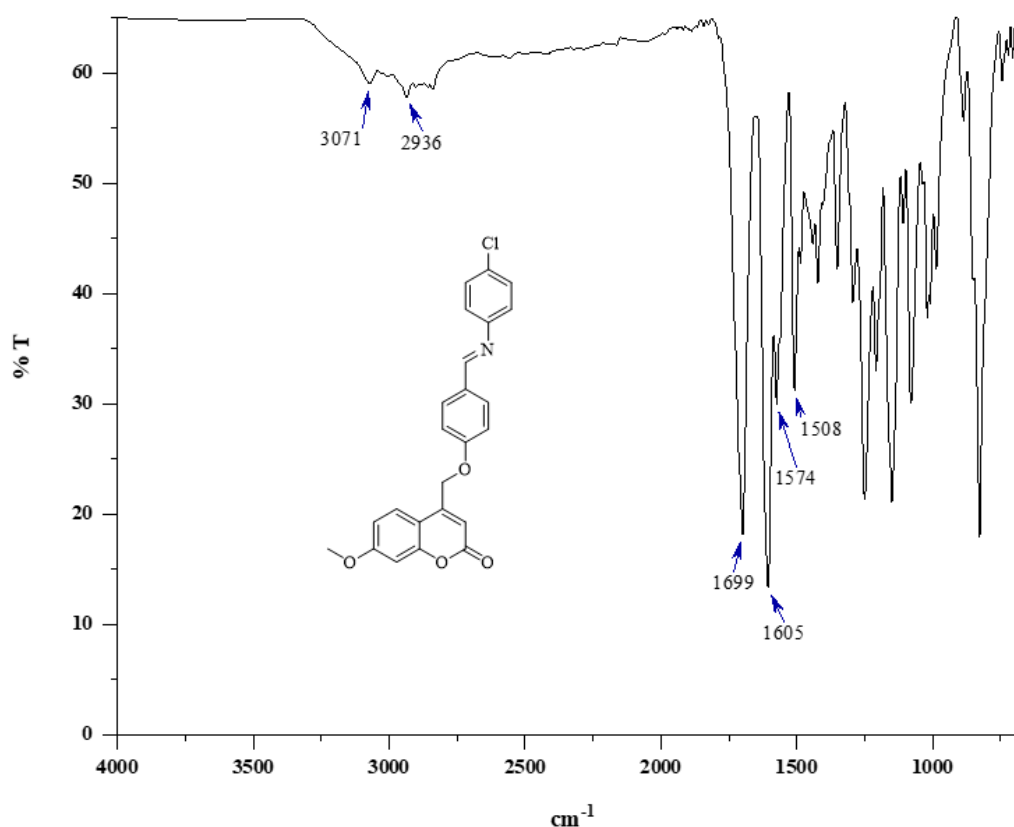

IR spectrum of (*E*)-4-((4-(((4-chlorophenyl)imino)methyl)phenoxy)methyl)-7-methoxy-2*H*-chromen-2-one (**13c**)

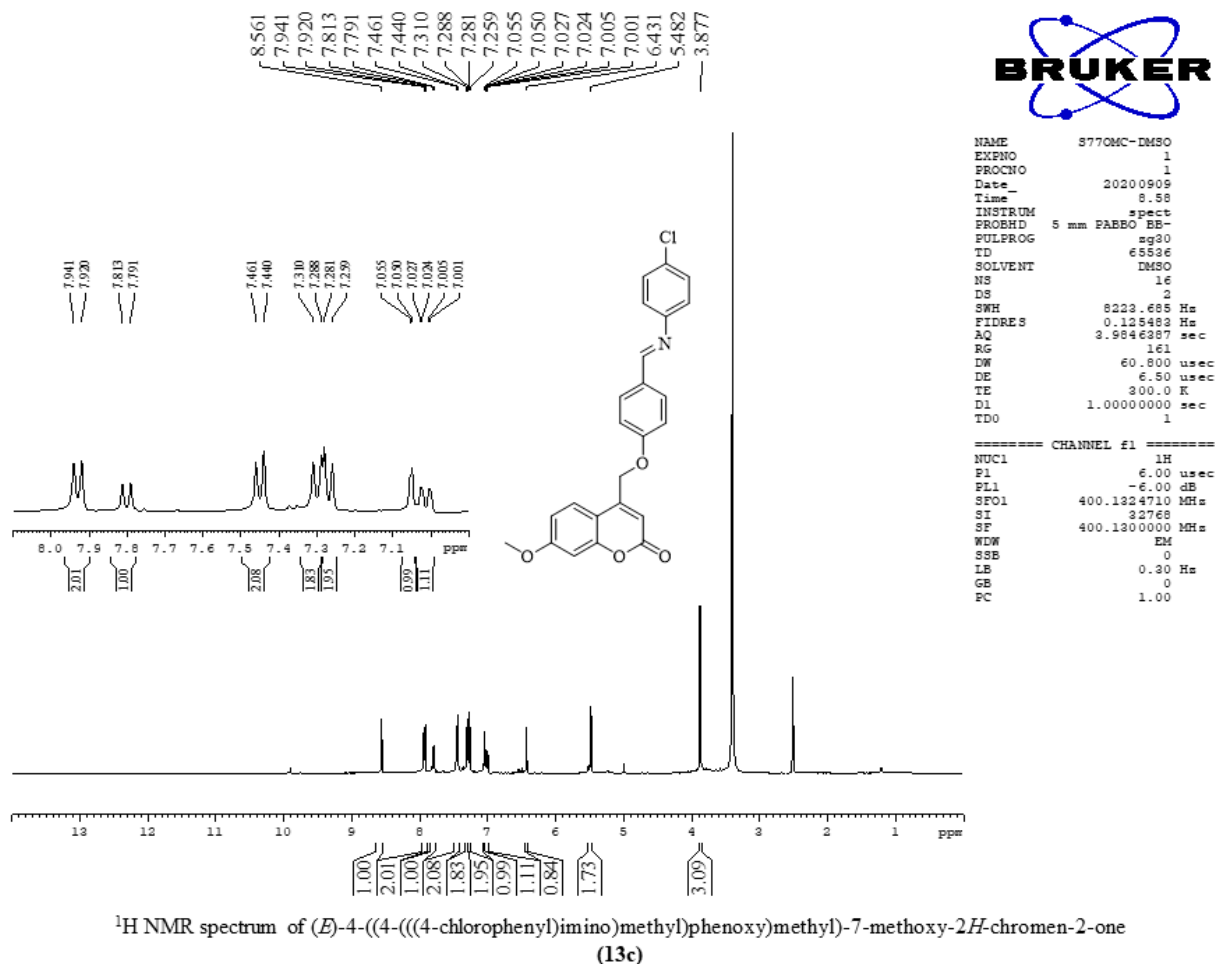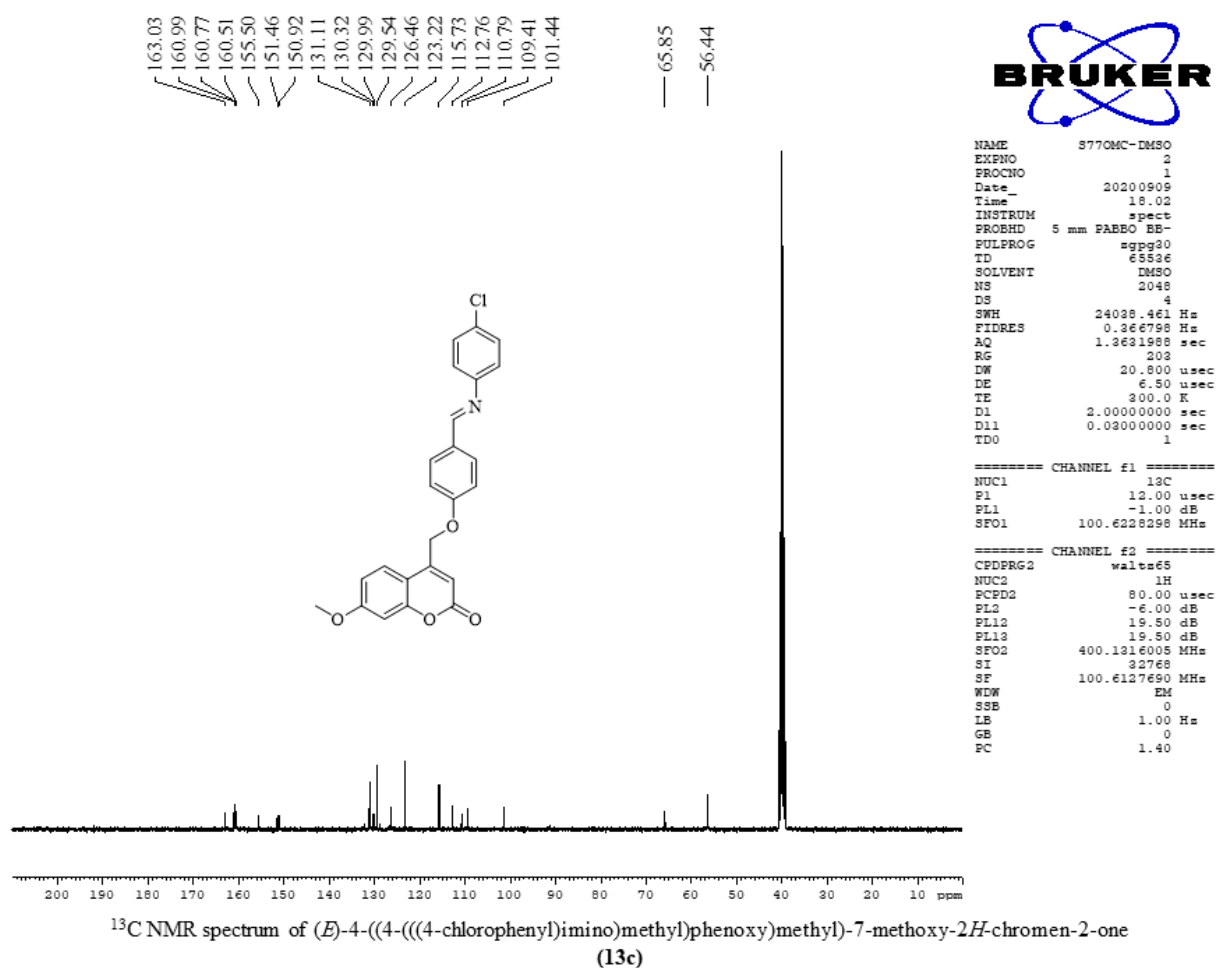

Compound Table

| Compound Label                                                         | RT    | Mass    | Abund | Formula                                                         | Tgt Mass | Diff (ppm) |
|------------------------------------------------------------------------|-------|---------|-------|-----------------------------------------------------------------|----------|------------|
| Cpd 1: C <sub>24</sub> H <sub>18</sub> ClN <sub>4</sub> O <sub>4</sub> | 0.254 | 419.092 | 49039 | C <sub>24</sub> H <sub>18</sub> ClN <sub>4</sub> O <sub>4</sub> | 419.0924 | -1.06      |

| Compound Label                                                         | <i>m/z</i> | RT    | Algorithm       | Mass    |
|------------------------------------------------------------------------|------------|-------|-----------------|---------|
| Cpd 1: C <sub>24</sub> H <sub>18</sub> ClN <sub>4</sub> O <sub>4</sub> | 420.0995   | 0.254 | Find By Formula | 419.092 |

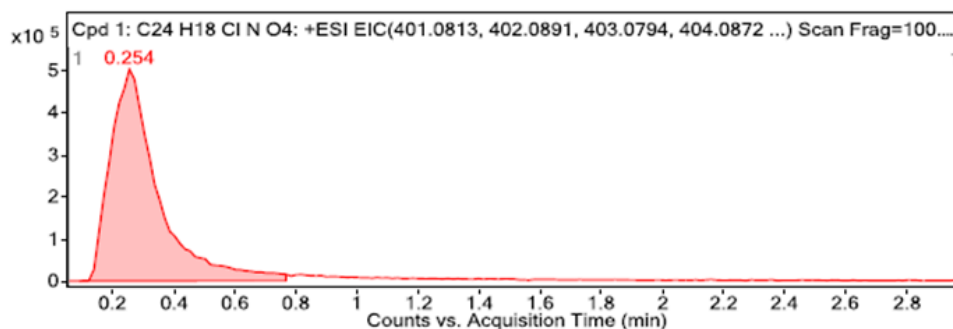

MS Zoomed Spectrum

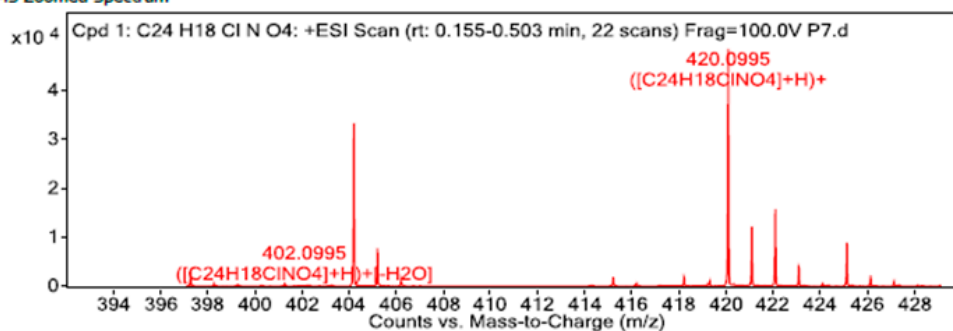

HRMS of (*E*)-4-((4-(((4-chlorophenyl)imino)methyl)phenoxy)methyl)-7-methoxy-2*H*-chromen-2-one (**13c**)

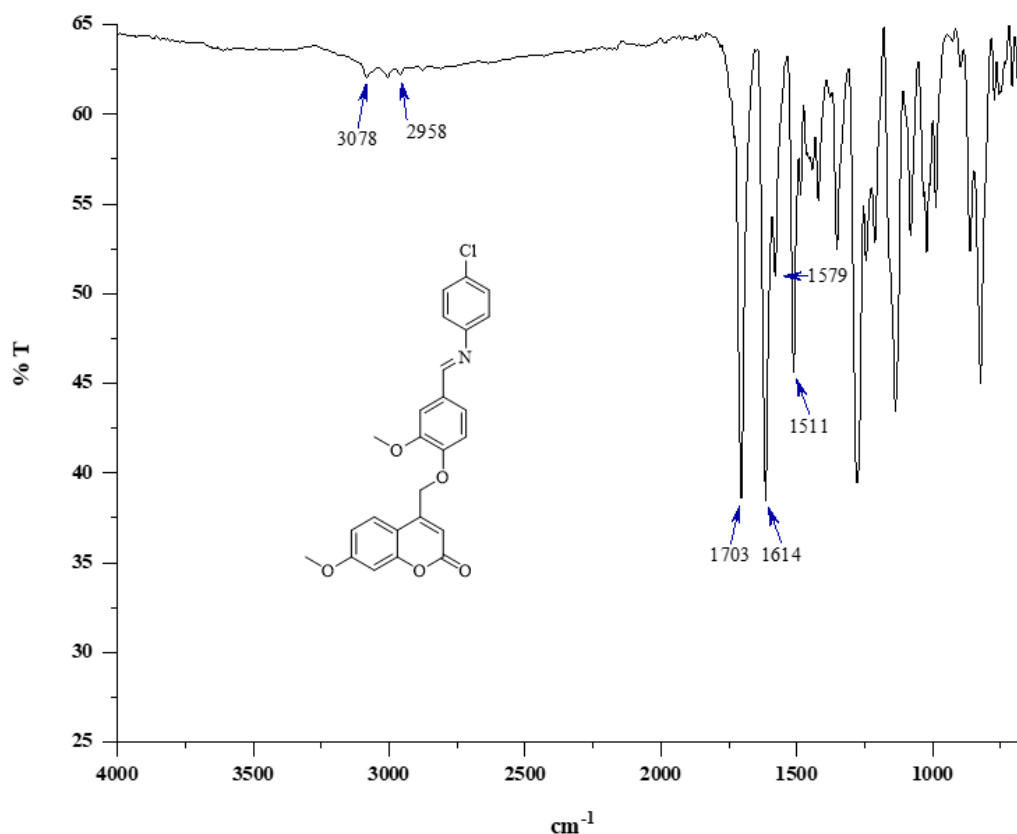

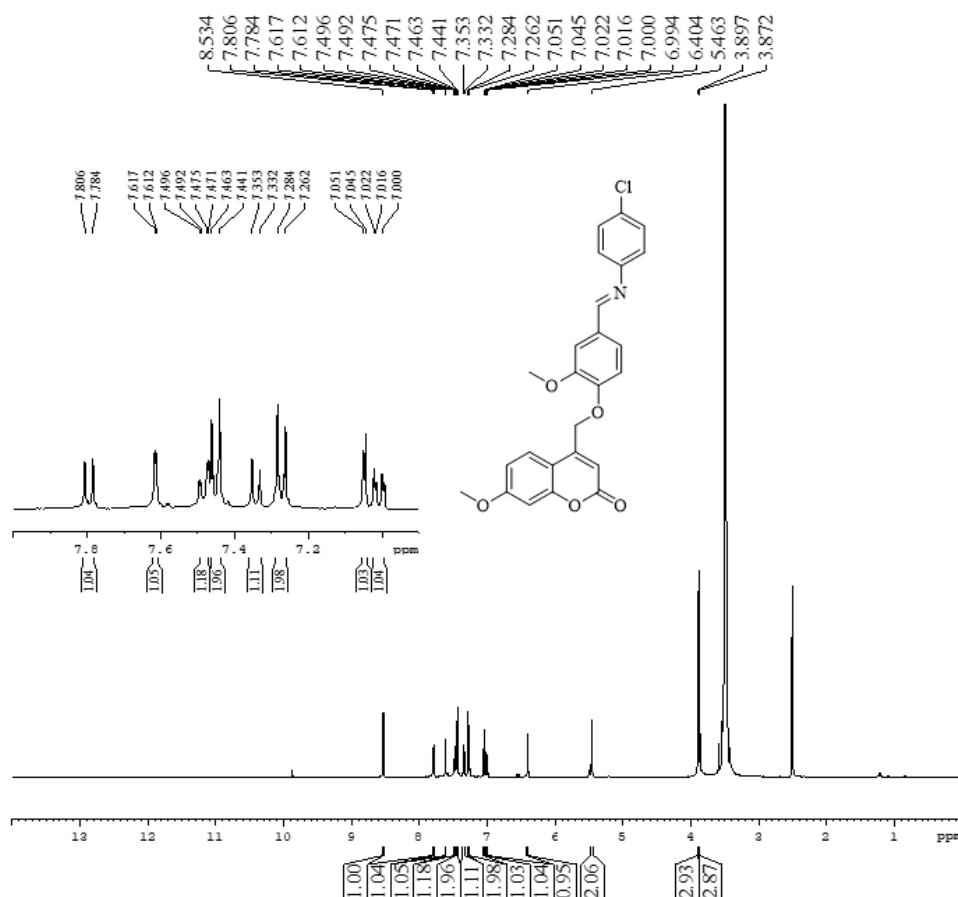

<sup>1</sup>H NMR spectrum of (E)-4-((4-(((4-chlorophenyl)imino)methyl)-2-methoxy phenoxy)methyl)-7-methoxy-2H-chromen-2-one (13d)

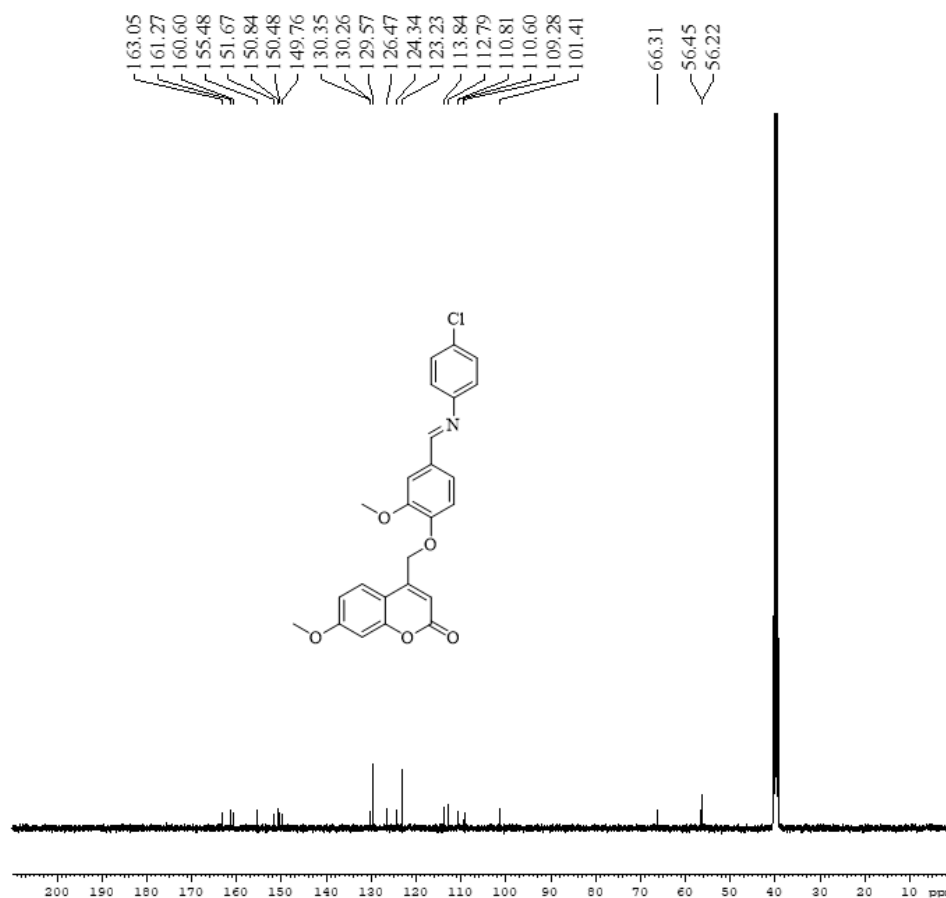

<sup>13</sup>C NMR spectrum of (E)-4-((4-(((4-chlorophenyl)imino)methyl)-2-methoxy phenoxy)methyl)-7-methoxy-2H-chromen-2-one (13d)

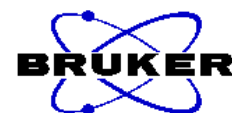

NAME S870MC-DMSO  
EXPNO 1  
PROCNO 1  
Date\_ 20200909  
Time\_ 9.16  
INSTRUM spect  
PROBHD 5 mm PABBO BB-  
PULPROG sg30  
TD 65536  
SOLVENT DMSO  
NS 16  
DS 2  
SWH 8223.685 Hz  
FIDRES 0.125483 Hz  
AQ 3.9846287 sec  
RG 114  
DW 60.800 usec  
DE 6.50 usec  
TE 300.0 K  
D1 1.00000000 sec  
TD0 1

===== CHANNEL f1 =====  
NUC1 1H  
P1 6.00 usec  
PL1 -6.00 dB  
SFO1 400.1324710 MHz  
SI 32768  
SF 400.1300000 MHz  
WDW EM  
SSB 0  
LB 0.30 Hz  
GB 0  
FC 1.00

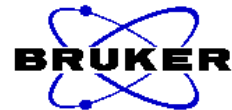

NAME S870MC-DMSO  
EXPNO 2  
PROCNO 1  
Date\_ 20200909  
Time\_ 17.20  
INSTRUM spect  
PROBHD 5 mm PABBO BB-  
PULPROG sgpg30  
TD 65536  
SOLVENT DMSO  
NS 1984  
DS 4  
SWH 24038.461 Hz  
FIDRES 0.366798 Hz  
AQ 1.3631988 sec  
RG 203  
DW 20.800 usec  
DE 6.50 usec  
TE 300.0 K  
D1 2.00000000 sec  
D11 0.03000000 sec  
TD0 1

===== CHANNEL f1 =====  
NUC1 13C  
P1 12.00 usec  
PL1 -1.00 dB  
SFO1 100.6228298 MHz

===== CHANNEL f2 =====  
CPDPRG2 waltz65  
NUC2 1H  
PCPD2 80.00 usec  
PL2 -6.00 dB  
PL12 19.50 dB  
PL13 19.50 dB  
SFO2 400.1316005 MHz  
SI 32768  
SF 100.6127690 MHz  
WDW EM  
SSB 0  
LB 1.00 Hz  
GB 0  
FC 1.40

Compound Table

| Compound Label                                             | RT    | Mass     | Abund | Formula                                             | Tgt Mass | Diff (ppm) |
|------------------------------------------------------------|-------|----------|-------|-----------------------------------------------------|----------|------------|
| Cpd 1: C <sub>25</sub> H <sub>20</sub> Cl N O <sub>5</sub> | 0.243 | 449.1028 | 87486 | C <sub>25</sub> H <sub>20</sub> Cl N O <sub>5</sub> | 449.103  | -0.47      |

| Compound Label                                             | <i>m/z</i> | RT    | Algorithm       | Mass     |
|------------------------------------------------------------|------------|-------|-----------------|----------|
| Cpd 1: C <sub>25</sub> H <sub>20</sub> Cl N O <sub>5</sub> | 450.1102   | 0.243 | Find By Formula | 449.1028 |

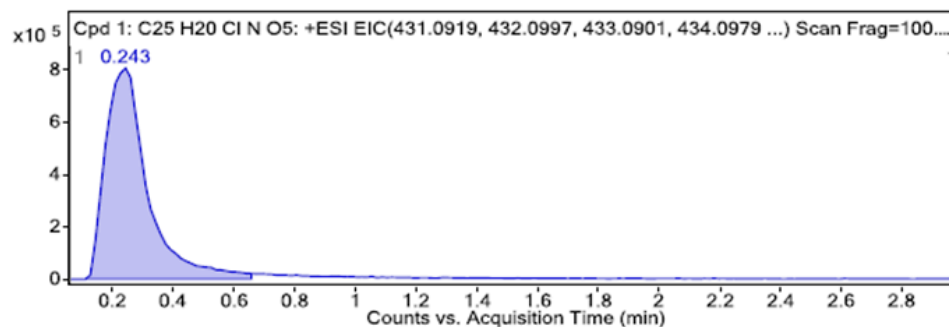

MS Zoomed Spectrum

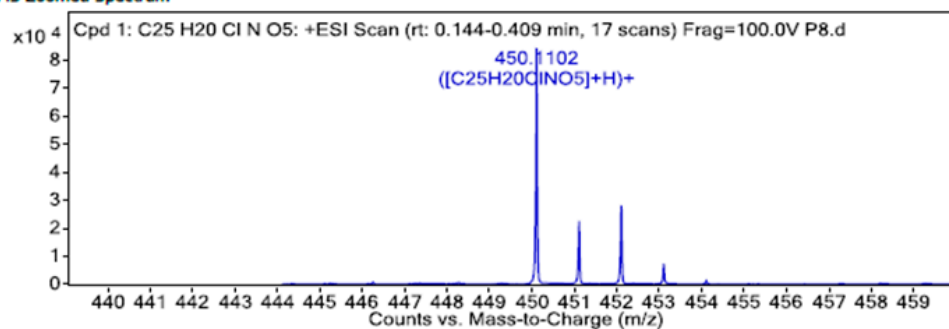

HRMS of (*E*)-4-((4-(((4-chlorophenyl)imino)methyl)-2-methoxy phenoxy)methyl)-7-methoxy-2*H*-chromen-2-one (13d)

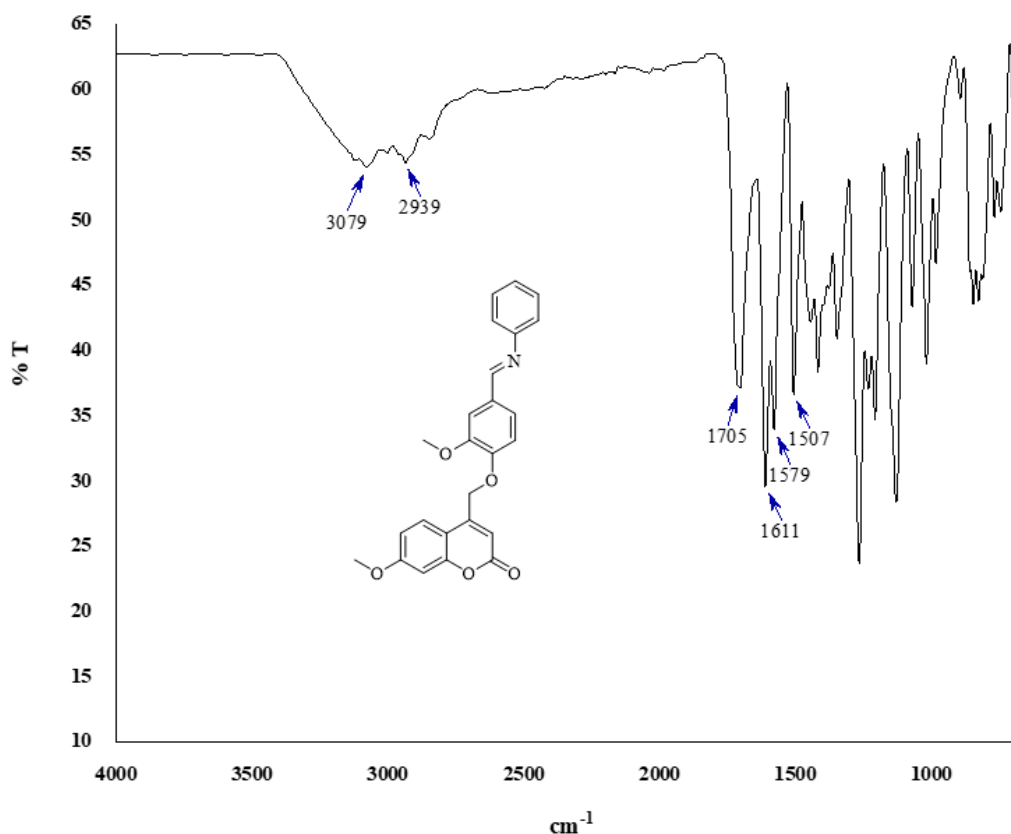

IR spectrum of (*E*)-7-methoxy-4-((2-methoxy-4-((phenylimino)methyl) phenoxy)methyl)-2*H*-chromen-2-one (13e)



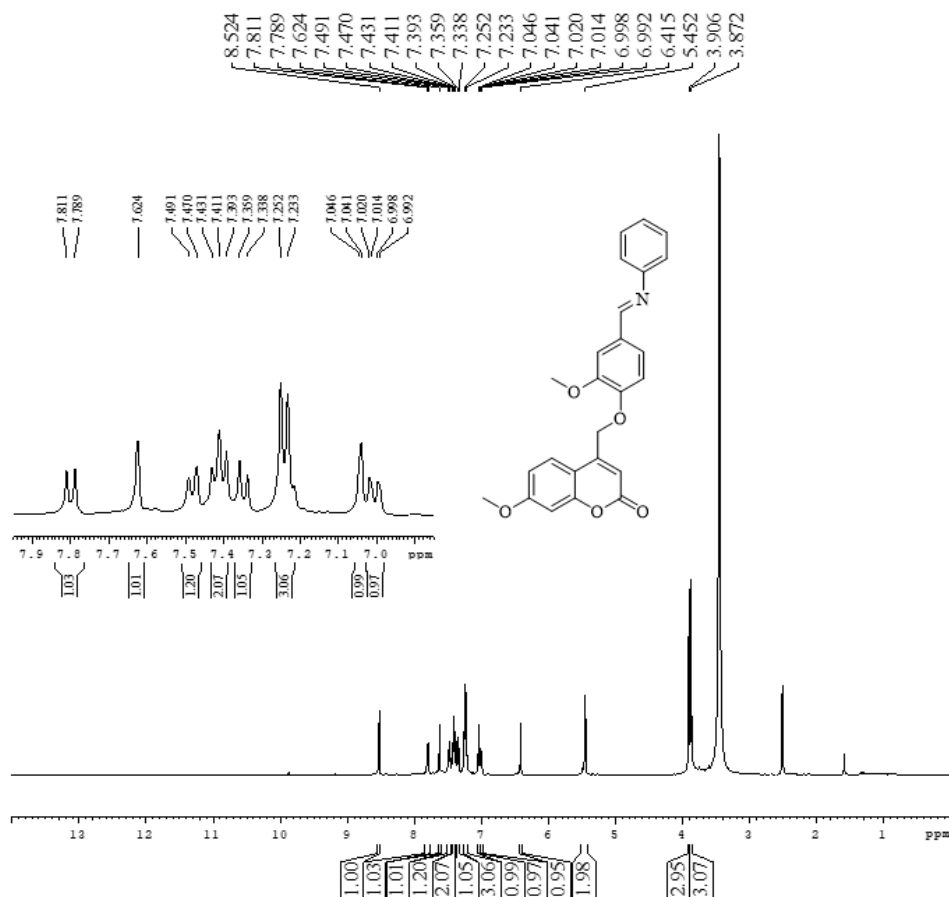

<sup>1</sup>H NMR spectrum of (E)-7-methoxy-4-((2-methoxy-4-((phenylimino)methyl) phenoxy)methyl)-2H-chromen-2-one (13e)

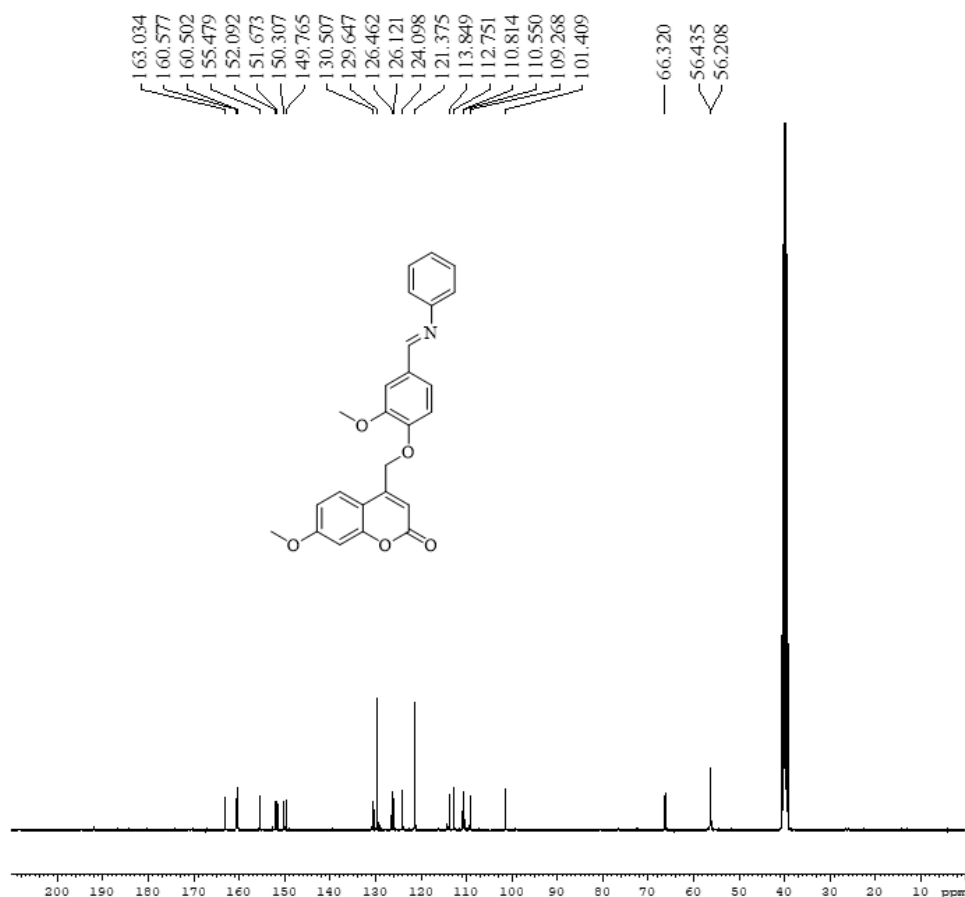

<sup>13</sup>C NMR spectrum of (E)-7-methoxy-4-((2-methoxy-4-((phenylimino)methyl) phenoxy)methyl)-2H-chromen-2-one (13e)

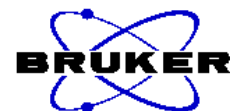

NAME S970MC-DMSO  
EXPNO 1  
PROCNO 1  
Date\_ 20201007  
Time\_ 16.43  
INSTRUM spect  
PROBHD 5 mm PABBO BB-  
PULPROG zg30  
TD 65536  
SOLVENT DMSO  
NS 16  
DS 2  
SWH 8223.685 Hz  
FIDRES 0.125483 Hz  
AQ 3.9846387 sec  
RG 144  
DW 60.800 usec  
DE 6.50 usec  
TE 300.0 K  
D1 1.0000000 sec  
TD0 1  
===== CHANNEL f1 =====  
NUC1 1H  
P1 6.00 usec  
PL1 -6.00 dB  
SFO1 400.1324710 MHz  
SI 32768  
SF 400.1300000 MHz  
WDW EM  
SSB 0  
LB 0.30 Hz  
GB 0  
PC 1.00

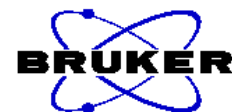

NAME S970MC-DMSO  
EXPNO 2  
PROCNO 1  
Date\_ 20201008  
Time\_ 15.27  
INSTRUM spect  
PROBHD 5 mm PABBO BB-  
PULPROG zgpg30  
TD 65536  
SOLVENT DMSO  
NS 20480  
DS 4  
SWH 24038.461 Hz  
FIDRES 0.366798 Hz  
AQ 1.3631988 sec  
RG 203  
DW 20.800 usec  
DE 6.50 usec  
TE 300.0 K  
D1 2.0000000 sec  
D11 0.0300000 sec  
TD0 1  
===== CHANNEL f1 =====  
NUC1 13C  
P1 12.00 usec  
PL1 -1.00 dB  
SFO1 100.6228298 MHz  
===== CHANNEL f2 =====  
CPDPRG2 waltz65  
NUC2 1H  
PCPD2 80.00 usec  
PL2 -6.00 dB  
PL12 19.50 dB  
PL13 19.50 dB  
SFO2 400.1316005 MHz  
SI 32768  
SF 100.6127690 MHz  
WDW EM  
SSB 0  
LB 1.00 Hz  
GB 0  
PC 1.40

Compound Table

| Compound Label                                          | RT    | Mass     | Abund  | Formula                                          | Tgt Mass | Diff (ppm) |
|---------------------------------------------------------|-------|----------|--------|--------------------------------------------------|----------|------------|
| Cpd 1: C <sub>25</sub> H <sub>21</sub> N O <sub>5</sub> | 0.206 | 415.1421 | 287628 | C <sub>25</sub> H <sub>21</sub> N O <sub>5</sub> | 415.142  | 0.37       |

| Compound Label                                          | <i>m/z</i> | RT    | Algorithm       | Mass     |
|---------------------------------------------------------|------------|-------|-----------------|----------|
| Cpd 1: C <sub>25</sub> H <sub>21</sub> N O <sub>5</sub> | 416.1495   | 0.206 | Find By Formula | 415.1421 |

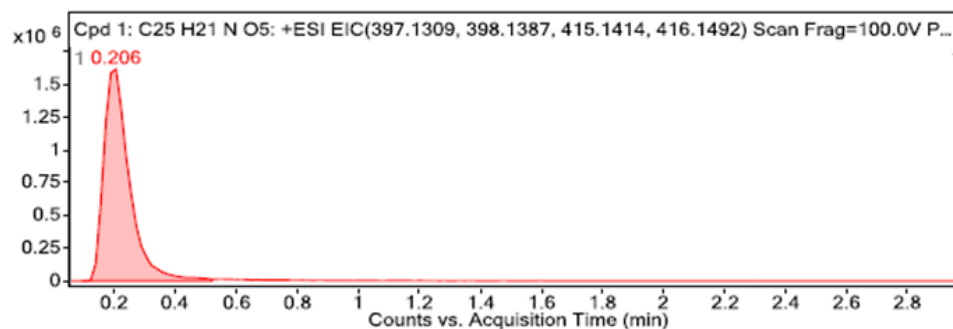

MS Zoomed Spectrum

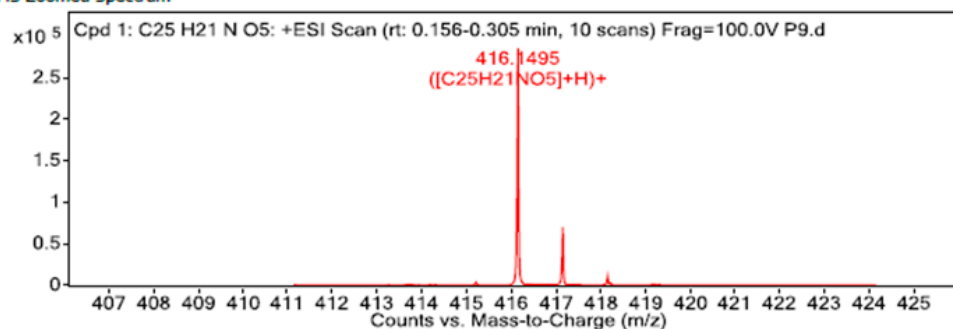

HRMS of (*E*)-7-methoxy-4-((2-methoxy-4-((phenylimino)methyl) phenoxy)methyl)-2*H*-chromen-2-one (**13e**)

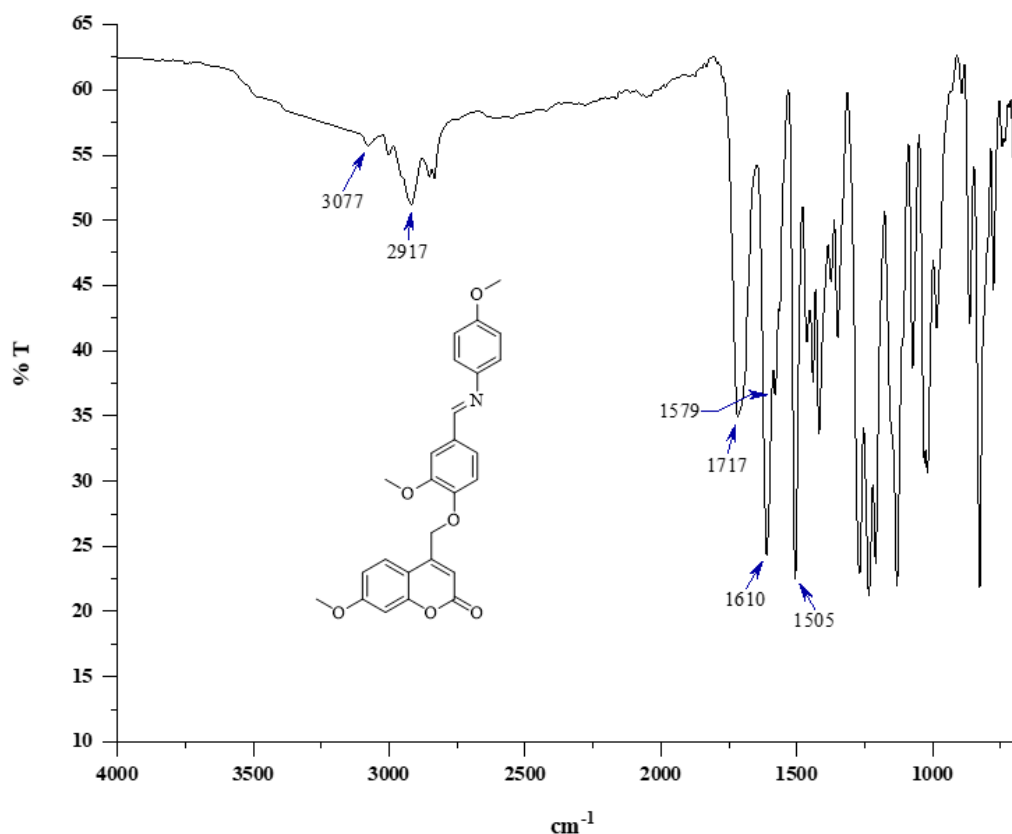

IR spectrum of (*E*)-7-methoxy-4-((2-methoxy-4-(((4-methoxyphenyl)imino) methyl)phenoxy)methyl)-2*H*-chromen-2-one (**13f**)

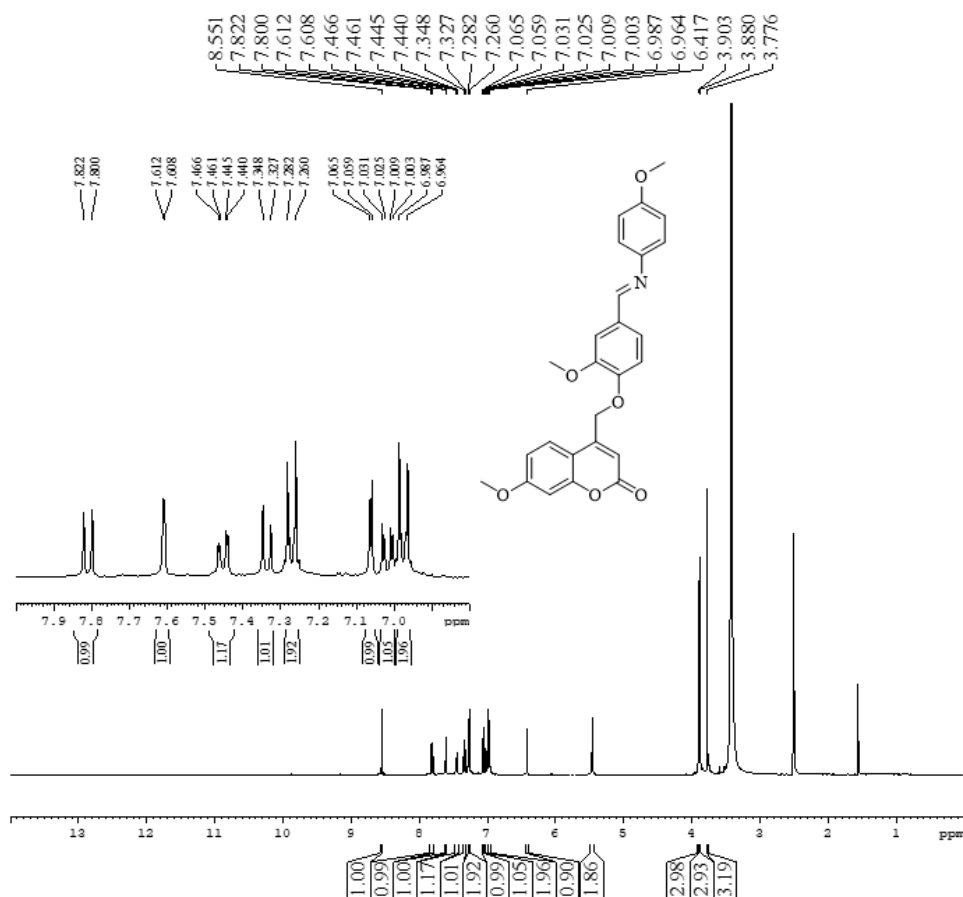

<sup>1</sup>H NMR spectrum of (E)-7-methoxy-4-((2-methoxy-4-(((4-methoxyphenyl)imino) methyl)phenoxy)methyl)-2H-chromen-2-one (13f)

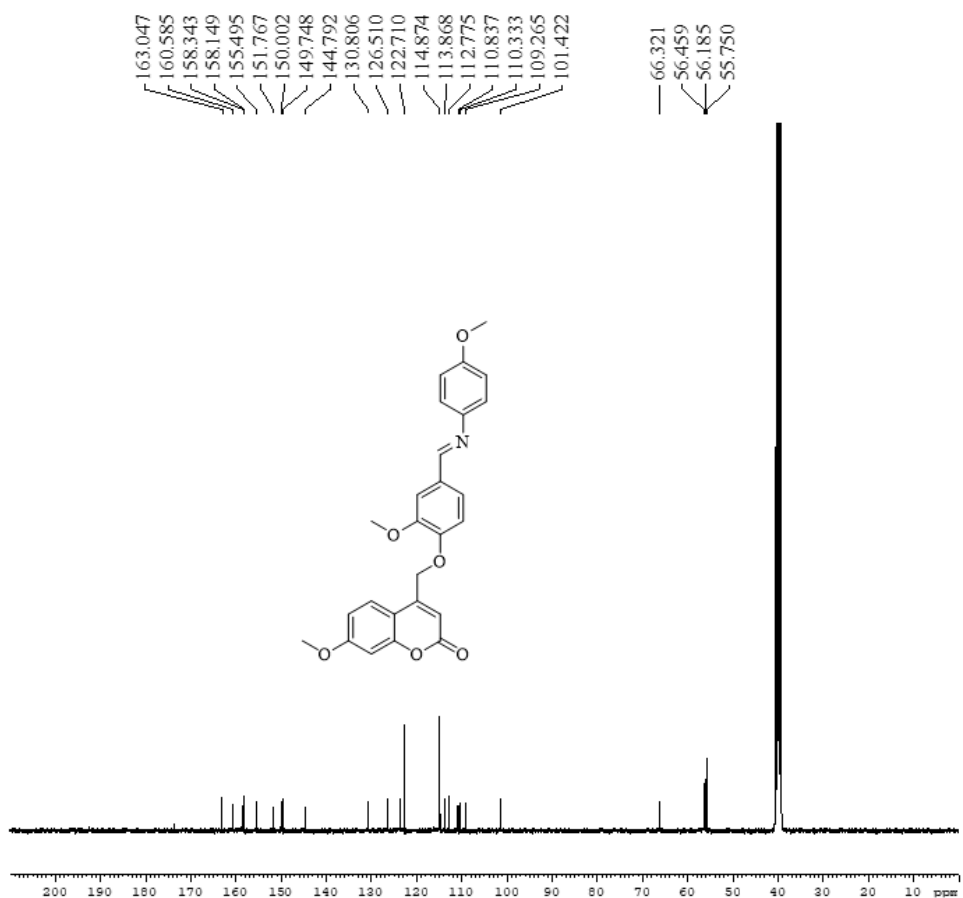

<sup>13</sup>C NMR spectrum of (E)-7-methoxy-4-((2-methoxy-4-(((4-methoxyphenyl)imino) methyl)phenoxy)methyl)-2H-chromen-2-one (13f)

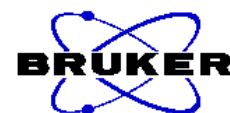

NAME S1070MC-DMSO  
EXPNO 3  
PROCNO 1  
Date\_ 20201007  
Time\_ 16.23  
INSTRUM spect  
PROBHD 5 mm PABBO BB-  
PULPROG sg30  
TD 65536  
SOLVENT DMSO  
NS 16  
DS 2  
SWH 8223.685 Hz  
FIDRES 0.125483 Hz  
AQ 2.9846387 sec  
RG 203  
DW 60.800 usec  
DE 6.50 usec  
TE 300.0 K  
D1 1.00000000 sec  
TD0 1

===== CHANNEL f1 =====  
NUC1 1H  
P1 6.00 usec  
PL1 -6.00 dB  
SFO1 400.1324710 MHz  
SI 32768  
SF 400.1300000 MHz  
WDW EM  
SSB 0  
LB 0.30 Hz  
GB 0  
PC 1.00

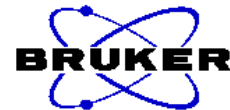

NAME S1070MC-DMSO  
EXPNO 3  
PROCNO 1  
Date\_ 20201007  
Time\_ 17.15  
INSTRUM spect  
PROBHD 5 mm PABBO BB-  
PULPROG sgpg30  
TD 65536  
SOLVENT DMSO  
NS 16384  
DS 4  
SWH 24038.461 Hz  
FIDRES 0.366798 Hz  
AQ 1.3631988 sec  
RG 203  
DW 20.800 usec  
DE 6.50 usec  
TE 300.0 K  
D1 2.00000000 sec  
D11 0.03000000 sec  
TD0 1

===== CHANNEL f1 =====  
NUC1 13C  
P1 12.00 usec  
PL1 -1.00 dB  
SFO1 100.6228298 MHz

===== CHANNEL f2 =====  
CPDPRG2 waltz65  
NUC2 1H  
PCPD2 80.00 usec  
PL2 -6.00 dB  
PL12 19.50 dB  
PL13 19.50 dB  
SFO2 400.1316005 MHz  
SI 32768  
SF 100.6127690 MHz  
WDW EM  
SSB 0  
LB 1.00 Hz  
GB 0  
PC 1.40

Compound Table

| Compound Label                                          | RT    | Mass     | Abund | Formula                                          | Tgt Mass | Diff (ppm) |
|---------------------------------------------------------|-------|----------|-------|--------------------------------------------------|----------|------------|
| Cpd 1: C <sub>26</sub> H <sub>23</sub> N O <sub>6</sub> | 0.193 | 445.1519 | 14309 | C <sub>26</sub> H <sub>23</sub> N O <sub>6</sub> | 445.1525 | -1.53      |

| Compound Label                                          | <i>m/z</i> | RT    | Algorithm       | Mass     |
|---------------------------------------------------------|------------|-------|-----------------|----------|
| Cpd 1: C <sub>26</sub> H <sub>23</sub> N O <sub>6</sub> | 446.1594   | 0.193 | Find By Formula | 445.1519 |

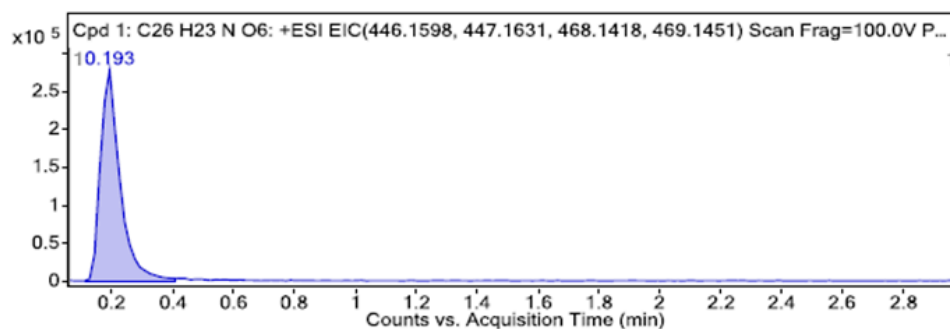

MS Zoomed Spectrum

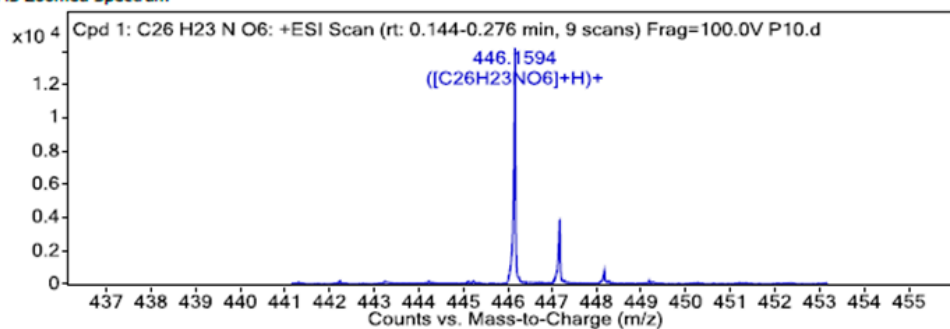

HRMS of (*E*)-7-methoxy-4-((2-methoxy-4-(((4-methoxyphenyl)imino) methyl)phenoxy)methyl)-2*H*-chromen-2-one (13f)

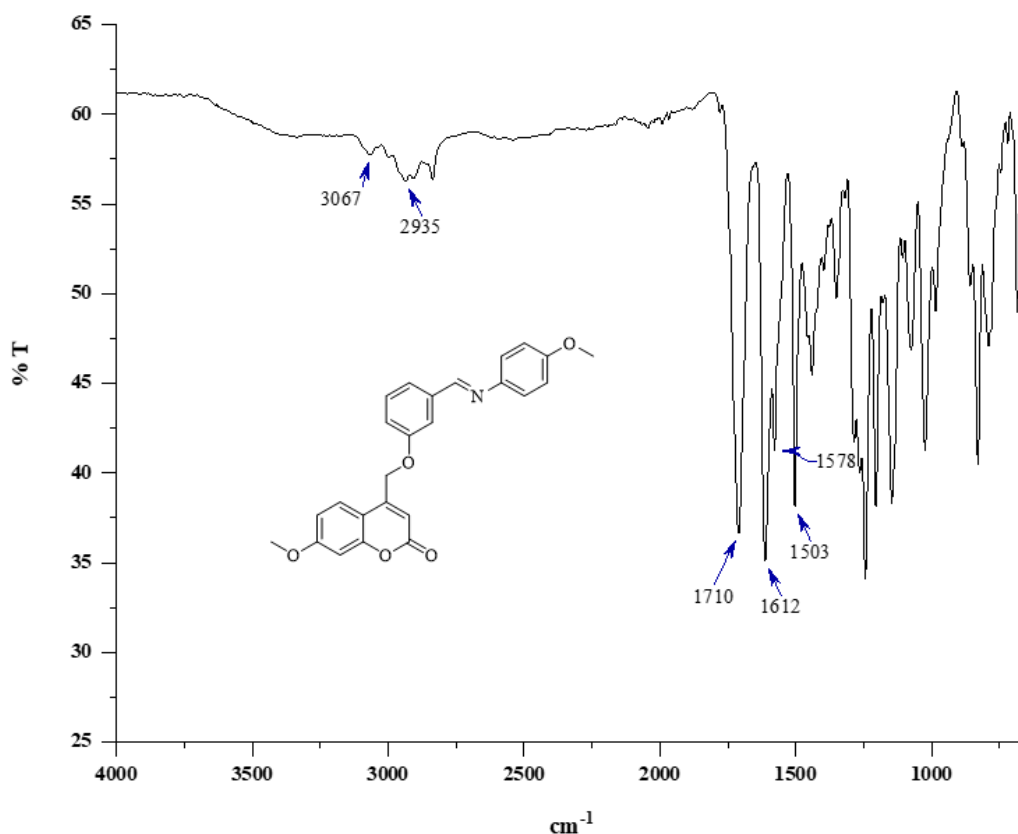

IR spectrum of (*E*)-7-methoxy-4-((3-(((4-methoxyphenyl)imino)methyl) phenoxy)methyl)-2*H*-chromen-2-one (13g)

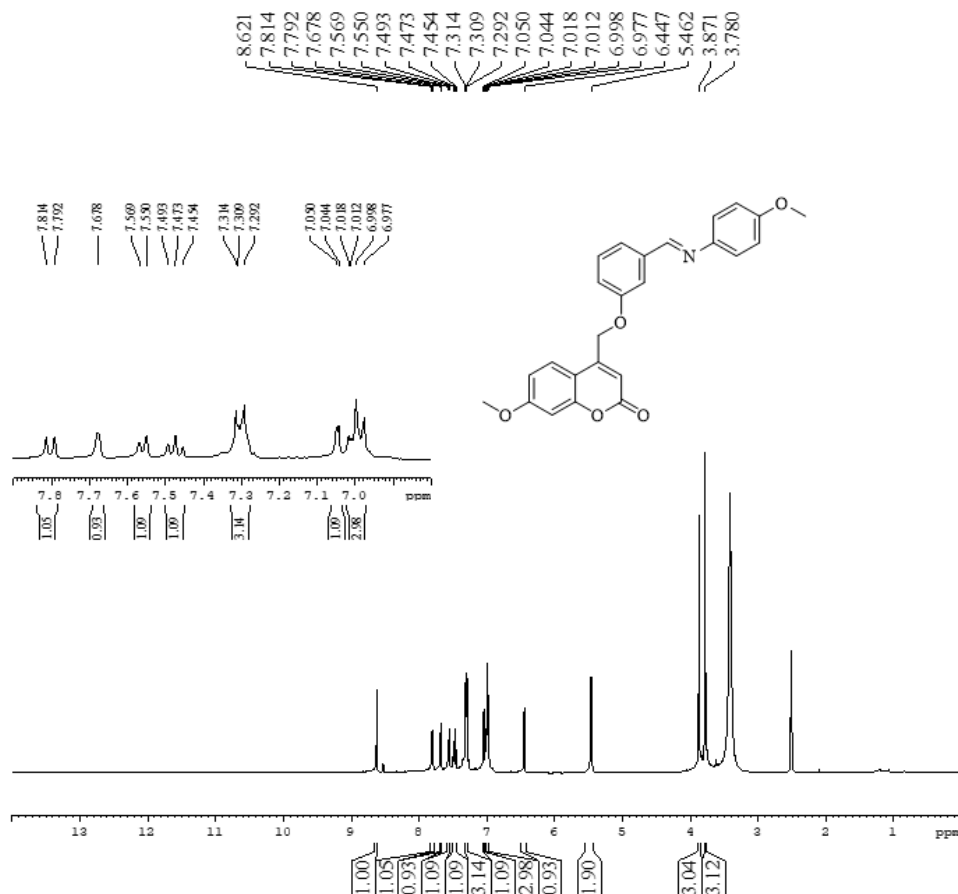

<sup>1</sup>H NMR spectrum of (E)-7-methoxy-4-((3-(((4-methoxyphenyl)imino)methyl)phenoxy)methyl)-2H-chromen-2-one (13g)

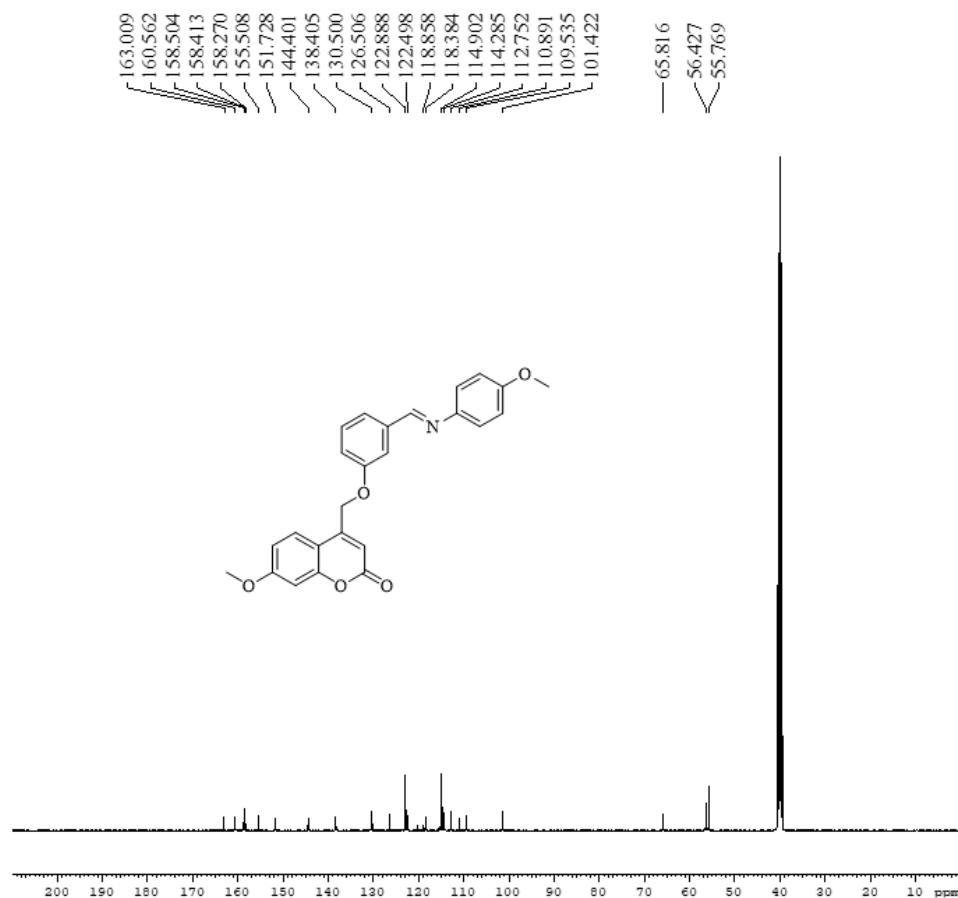

<sup>13</sup>C NMR spectrum of (E)-7-methoxy-4-((3-(((4-methoxyphenyl)imino)methyl)phenoxy)methyl)-2H-chromen-2-one (13g)

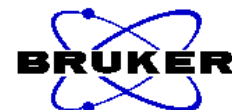

NAME S1970MC-DMSO  
EXPNO 1  
PROCNO 1  
Date\_ 20201008  
Time 15.04  
INSTRUM spect  
PROBHD 5 mm PABBO BB-  
PULPROG zg30  
TD 65536  
SOLVENT DMSO  
NS 16  
DS 2  
SWH 8223.685 Hz  
FIDRES 0.125482 Hz  
AQ 3.9846287 sec  
RG 128  
DW 60.800 usec  
DE 6.50 usec  
TE 300.0 K  
D1 1.00000000 sec  
TD0 1

===== CHANNEL f1 =====  
NUC1 1H  
P1 6.00 usec  
PL1 -6.00 dB  
SFO1 400.1324710 MHz  
SI 32768  
SF 400.1300000 MHz  
WDW EM  
SSB 0  
LB 0.30 Hz  
GB 0  
PC 1.00

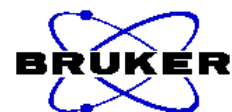

NAME S1970MC-DMSO  
EXPNO 2  
PROCNO 1  
Date\_ 20201011  
Time 16.58  
INSTRUM spect  
PROBHD 5 mm PABBO BB-  
PULPROG zgpg30  
TD 65536  
SOLVENT DMSO  
NS 18432  
DS 4  
SWH 24038.461 Hz  
FIDRES 0.366798 Hz  
AQ 1.3621988 sec  
RG 203  
DW 20.800 usec  
DE 6.50 usec  
TE 300.0 K  
D1 2.00000000 sec  
D11 0.03000000 sec  
TD0 1

===== CHANNEL f1 =====  
NUC1 13C  
P1 12.00 usec  
PL1 -1.00 dB  
SFO1 100.6228298 MHz

===== CHANNEL f2 =====  
CPDPRG2 waltz65  
NUC2 1H  
PCPD2 80.00 usec  
PL2 -6.00 dB  
PL12 19.50 dB  
PL13 19.50 dB  
SFO2 400.1316005 MHz  
SI 32768  
SF 100.6127690 MHz  
WDW EM  
SSB 0  
LB 1.00 Hz  
GB 0  
PC 1.40

Compound Table

| Compound Label                                          | RT    | Mass     | Abund | Formula                                          | Tgt Mass | Diff (ppm) |
|---------------------------------------------------------|-------|----------|-------|--------------------------------------------------|----------|------------|
| Cpd 1: C <sub>25</sub> H <sub>21</sub> N O <sub>5</sub> | 0.191 | 415.1417 | 22797 | C <sub>25</sub> H <sub>21</sub> N O <sub>5</sub> | 415.142  | -0.69      |

| Compound Label                                          | <i>m/z</i> | RT    | Algorithm       | Mass     |
|---------------------------------------------------------|------------|-------|-----------------|----------|
| Cpd 1: C <sub>25</sub> H <sub>21</sub> N O <sub>5</sub> | 416.1491   | 0.191 | Find By Formula | 415.1417 |

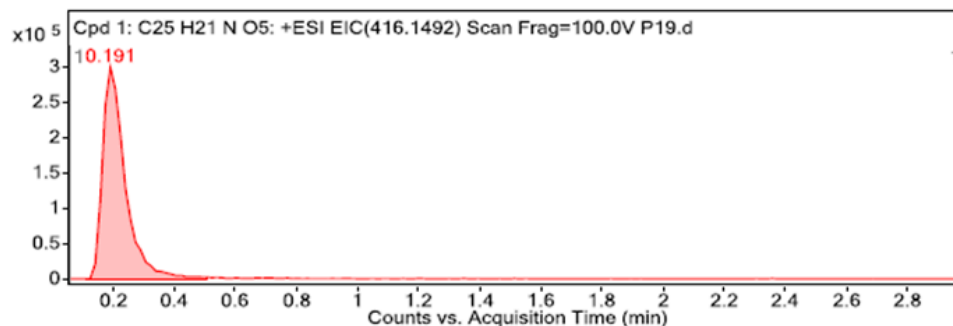

MS Zoomed Spectrum

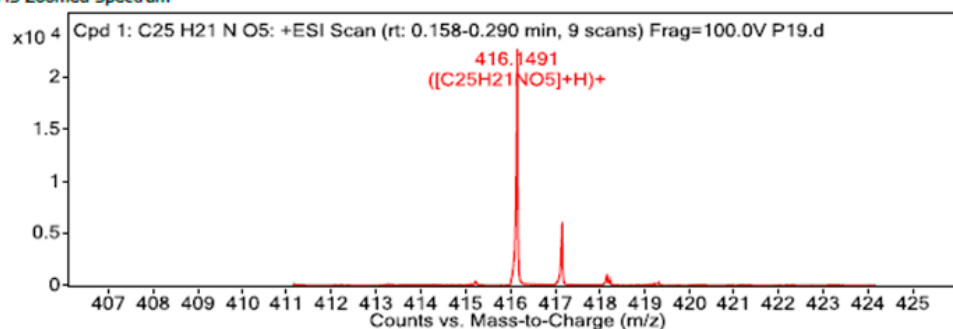

HRMS of (*E*)-7-methoxy-4-((3-(((4-methoxyphenyl)imino)methyl) phenoxy)methyl)-2*H*-chromen-2-one (**13g**)

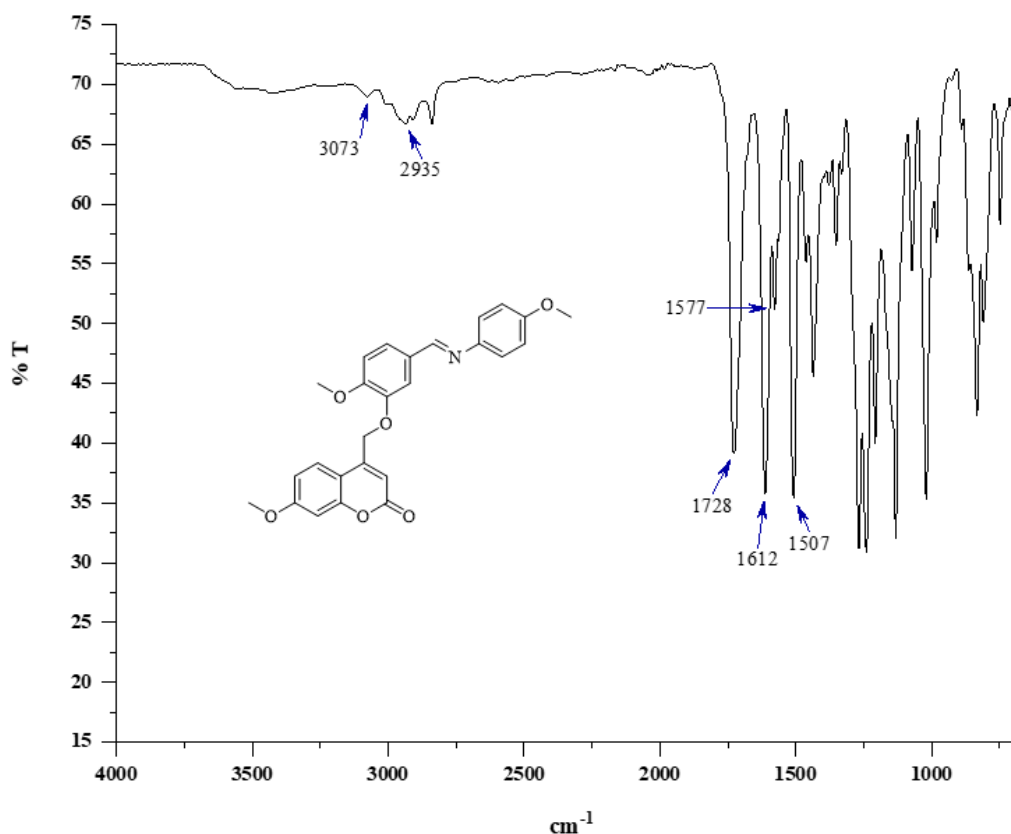

IR spectrum of (*E*)-7-methoxy-4-((2-methoxy-5-(((4-methoxyphenyl)imino)methyl)phenoxy)methyl)-2*H*-chromen-2-one (**13h**)

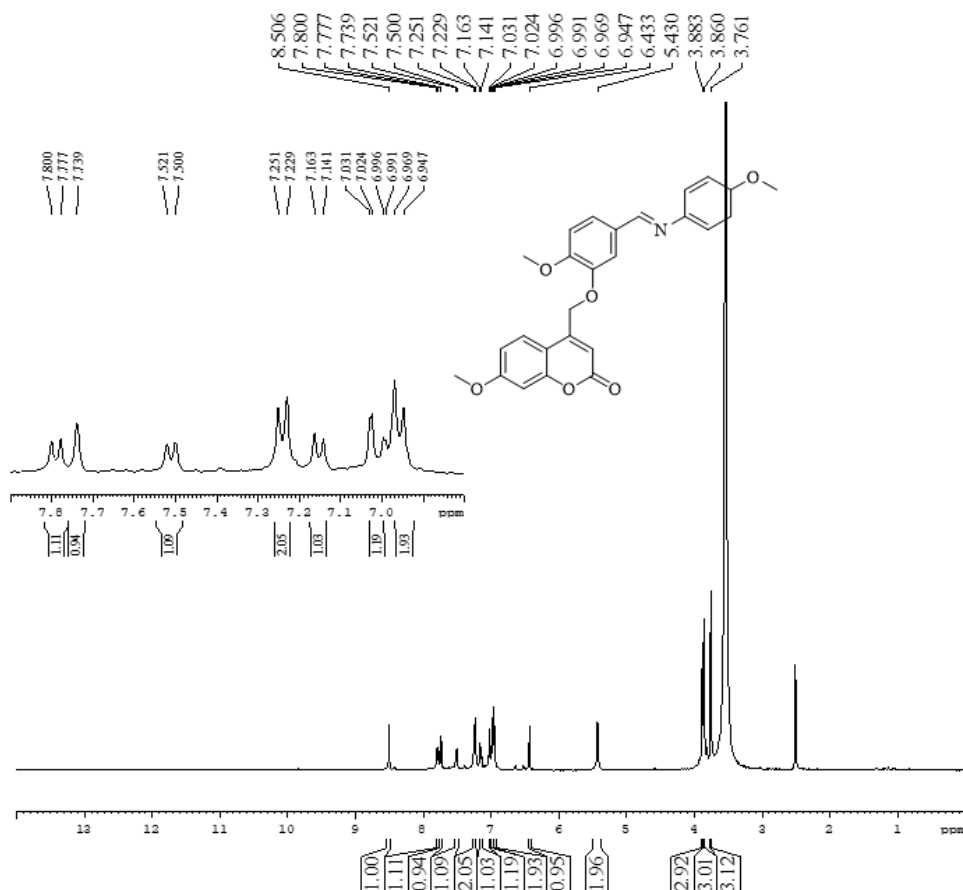

<sup>1</sup>H NMR spectrum of (E)-7-methoxy-4-((2-methoxy-5-(((4-methoxyphenyl)imino) methyl)phenoxy)methyl)-2H-chromen-2-one (13h)

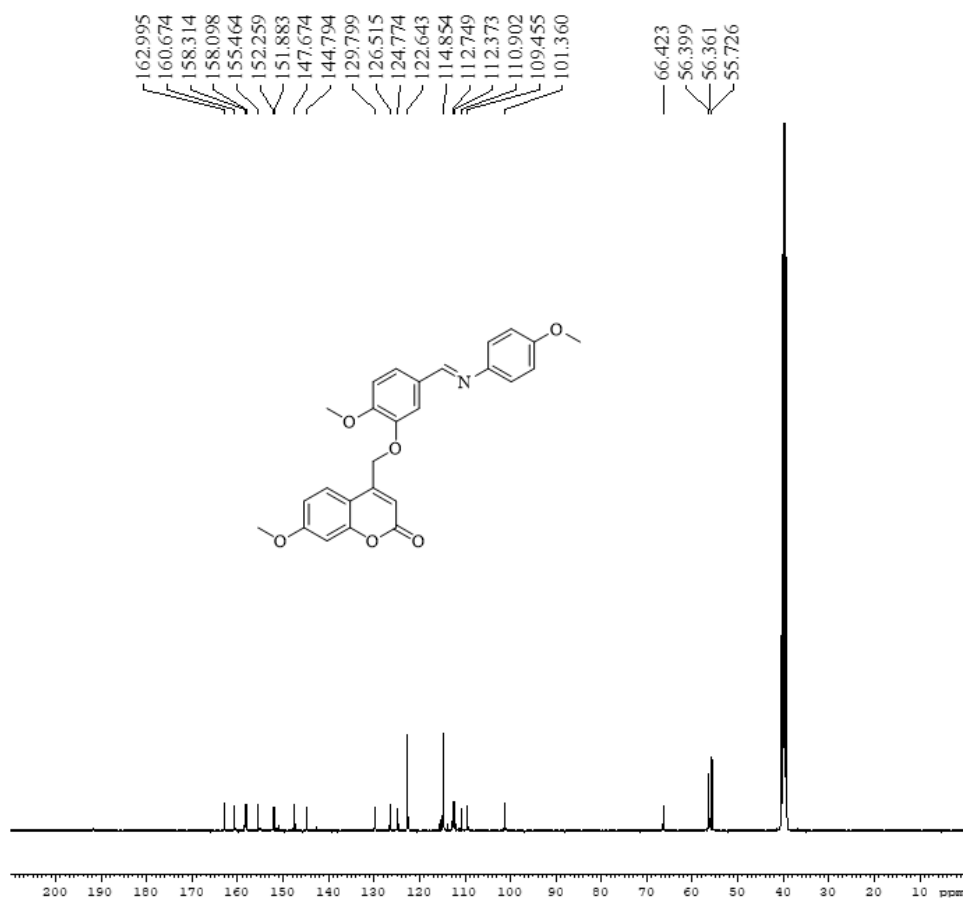

<sup>13</sup>C NMR spectrum of (E)-7-methoxy-4-((2-methoxy-5-(((4-methoxyphenyl)imino) methyl)phenoxy)methyl)-2H-chromen-2-one (13h)

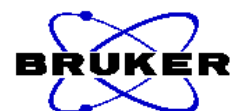

NAME S2070MC-DMSO  
EXPNO 3  
PROCNO 1  
Date\_ 20201011  
Time 16.08  
INSTRUM spect  
PROBHD 5 mm PABBO BB-  
PULPROG zg30  
TD 65536  
SOLVENT DMSO  
NS 100  
DS 2  
SWH 8223.685 Hz  
FIDRES 0.125482 Hz  
AQ 3.9846387 sec  
RG 90.5  
DW 60.800 usec  
DE 6.50 usec  
TE 300.0 K  
D1 1.00000000 sec  
TD0 1

===== CHANNEL f1 =====  
NUC1 1H  
P1 6.00 usec  
PL1 -6.00 dB  
SFO1 400.1324710 MHz  
SI 32768  
SF 400.1300000 MHz  
WDW EM  
SSE 0  
LB 0.30 Hz  
GB 0  
PC 1.00

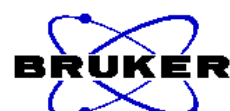

NAME S2070MC-DMSO  
EXPNO 2  
PROCNO 1  
Date\_ 20201015  
Time 14.49  
INSTRUM spect  
PROBHD 5 mm PABBO BB-  
PULPROG zgpg30  
TD 65536  
SOLVENT DMSO  
NS 25600  
DS 4  
SWH 24038.461 Hz  
FIDRES 0.366798 Hz  
AQ 1.3621988 sec  
RG 203  
DW 20.800 usec  
DE 6.50 usec  
TE 300.0 K  
D1 2.00000000 sec  
D11 0.03000000 sec  
TD0 1

===== CHANNEL f1 =====  
NUC1 13C  
P1 12.00 usec  
PL1 -1.00 dB  
SFO1 100.6228298 MHz

===== CHANNEL f2 =====  
CPDPRG2 waltz16  
NUC2 1H  
PCPD2 80.00 usec  
PL2 -6.00 dB  
PL12 19.50 dB  
PL13 19.50 dB  
SFO2 400.1316005 MHz  
SI 32768  
SF 100.6127690 MHz  
WDW EM  
SSE 0  
LB 1.00 Hz  
GB 0  
PC 1.40

Compound Table

| Compound Label                                          | RT    | Mass     | Abund | Formula                                          | Tgt Mass | Diff (ppm) |
|---------------------------------------------------------|-------|----------|-------|--------------------------------------------------|----------|------------|
| Cpd 1: C <sub>26</sub> H <sub>23</sub> N O <sub>6</sub> | 0.191 | 445.1512 | 8662  | C <sub>26</sub> H <sub>23</sub> N O <sub>6</sub> | 445.1525 | -3         |

| Compound Label                                          | <i>m/z</i> | RT    | Algorithm       | Mass     |
|---------------------------------------------------------|------------|-------|-----------------|----------|
| Cpd 1: C <sub>26</sub> H <sub>23</sub> N O <sub>6</sub> | 446.1585   | 0.191 | Find By Formula | 445.1512 |

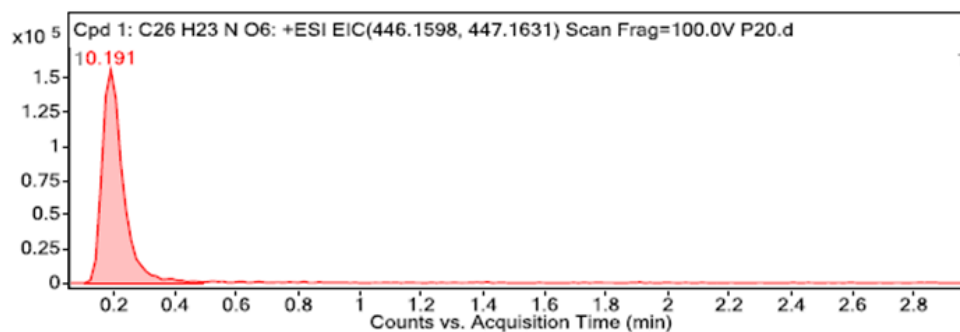

MS Zoomed Spectrum

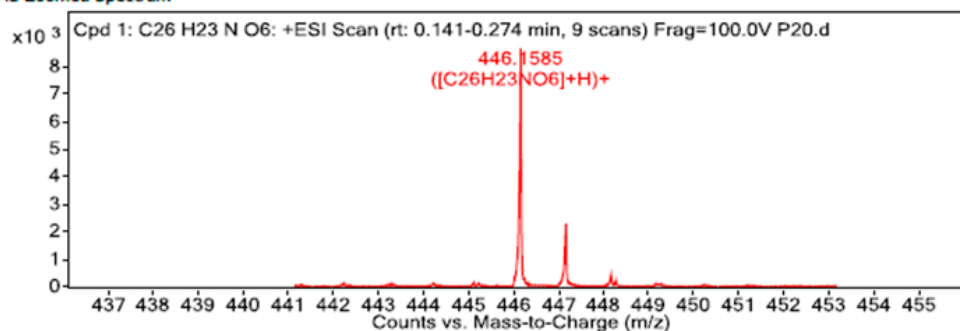

HRMS of (*E*)-7-methoxy-4-((2-methoxy-5-(((4-methoxyphenyl)imino) methyl)phenoxy)methyl)-2*H*-chromen-2-one  
(13h)

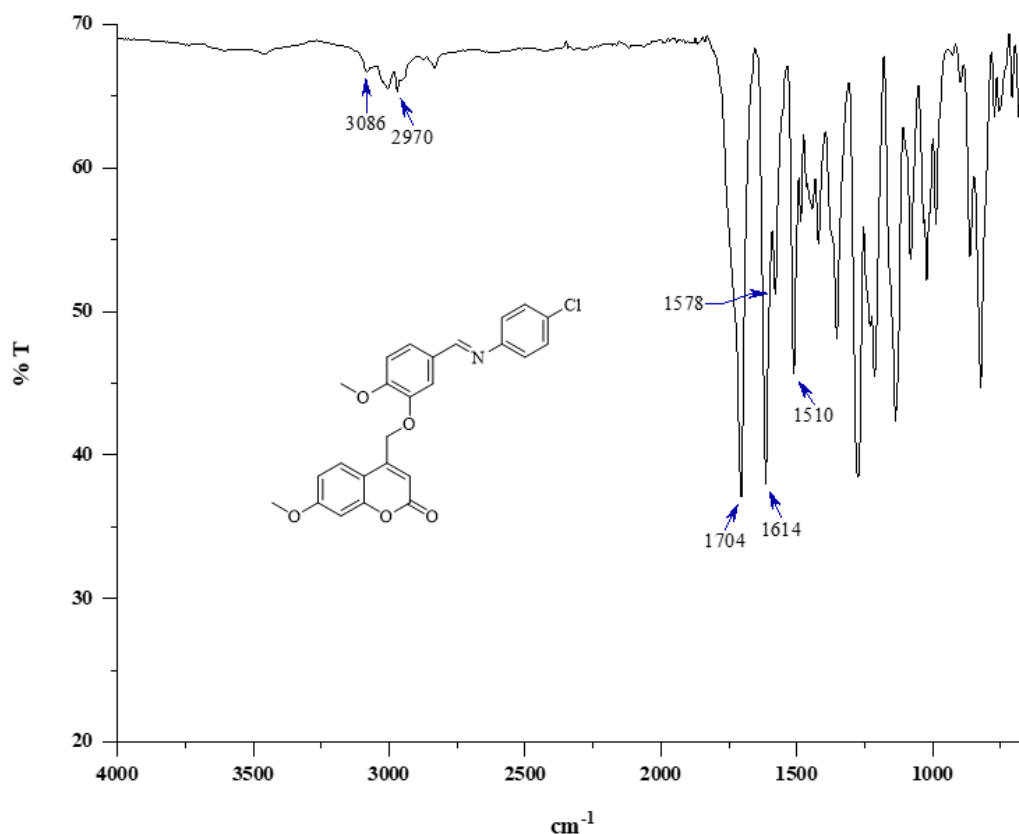

IR spectrum of (*E*)-4-((5-(((4-chlorophenyl)imino)methyl)-2-methoxy phenoxy)methyl)-7-methoxy-2*H*-chromen-2-one (13i)



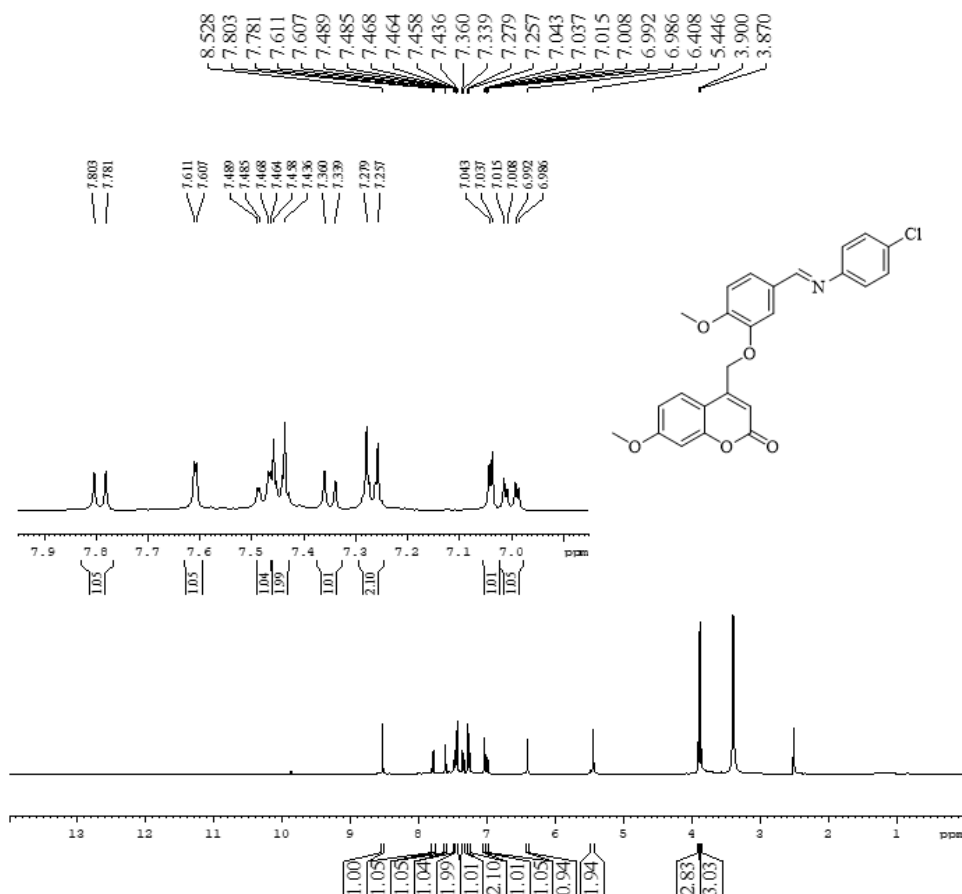

<sup>1</sup>H NMR spectrum of (E)-4-((5-(((4-chlorophenyl)imino)methyl)-2-methoxy phenoxy)methyl)-7-methoxy-2H-chromen-2-one (13i)

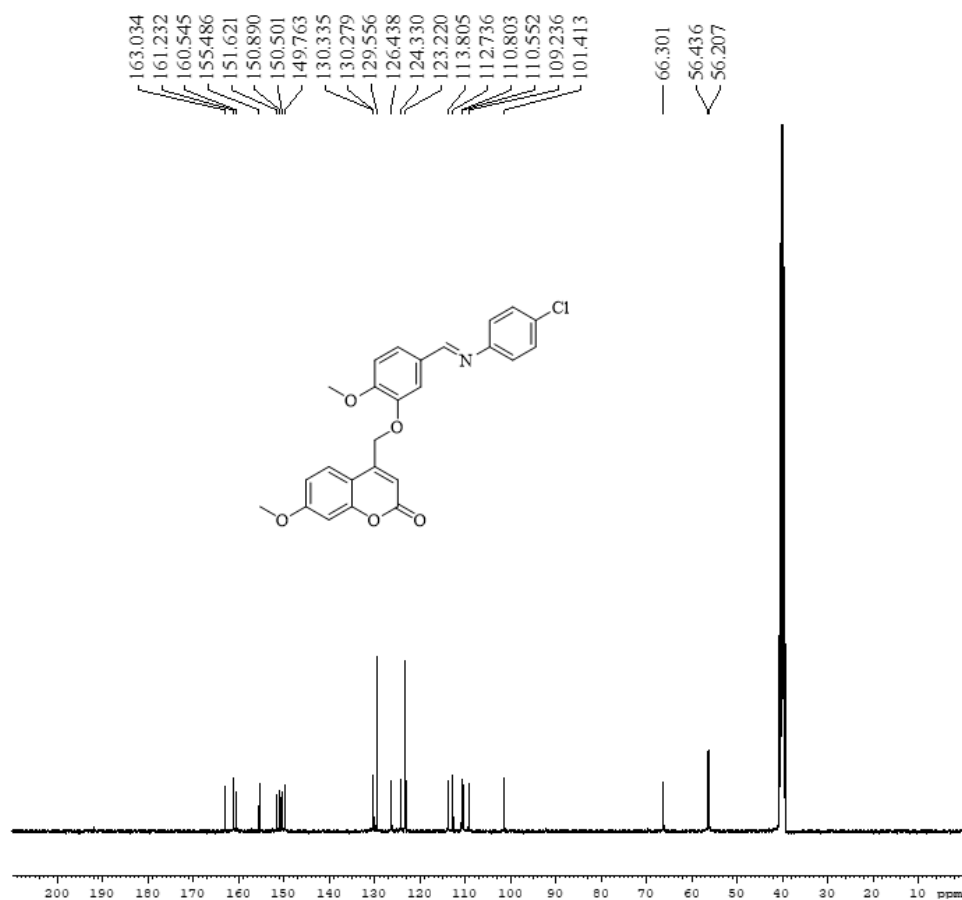

<sup>13</sup>C NMR spectrum of (E)-4-((5-(((4-chlorophenyl)imino)methyl)-2-methoxy phenoxy)methyl)-7-methoxy-2H-chromen-2-one (13i)

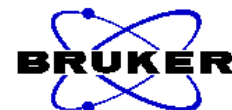

NAME S2370MC-DMSO  
EXPNO 2  
PROCNO 1  
Date 20201004  
Time 16.27  
INSTRUM spect  
PROBHD 5 mm F400 BB-  
PULPROG zgpg30  
TD 65536  
SOLVENT DMSO  
NS 16  
DS 2  
SWH 8223.685 Hz  
FIDRES 0.125483 Hz  
AQ 3.9846387 sec  
RG 144  
DW 60.800 usec  
DE 6.50 usec  
TE 300.0 K  
D1 1.00000000 sec  
TD0 1

===== CHANNEL f1 =====  
NUC1 1H  
P1 6.00 usec  
PL1 -6.00 dB  
SFO1 400.1324710 MHz  
SI 32768  
SF 400.1300000 MHz  
WDW EM  
SSB 0  
LB 0.30 Hz  
GB 0  
PC 1.00

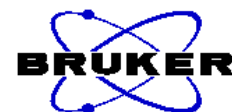

NAME S2370MC-DMSO  
EXPNO 1  
PROCNO 1  
Date 20201004  
Time 17.11  
INSTRUM spect  
PROBHD 5 mm F400 BB-  
PULPROG zgpg30  
TD 65536  
SOLVENT DMSO  
NS 15872  
DS 4  
SWH 24038.461 Hz  
FIDRES 0.366798 Hz  
AQ 1.3631988 sec  
RG 203  
DW 20.800 usec  
DE 6.50 usec  
TE 300.0 K  
D1 2.00000000 sec  
D11 0.03000000 sec  
TD0 1

===== CHANNEL f1 =====  
NUC1 13C  
P1 12.00 usec  
PL1 -1.00 dB  
SFO1 100.6228298 MHz

===== CHANNEL f2 =====  
CPDPRG2 waltz65  
NUC2 1H  
PCPD2 80.00 usec  
PL2 -6.00 dB  
PL12 19.50 dB  
PL13 19.50 dB  
SFO2 400.1316005 MHz  
SI 32768  
SF 100.6127690 MHz  
WDW EM  
SSB 0  
LB 1.00 Hz  
GB 0  
PC 1.40

Compound Table

| Compound Label                                             | RT    | Mass     | Abund | Formula                                             | Tgt Mass | Diff (ppm) |
|------------------------------------------------------------|-------|----------|-------|-----------------------------------------------------|----------|------------|
| Cpd 1: C <sub>25</sub> H <sub>20</sub> Cl N O <sub>5</sub> | 0.201 | 449.1029 | 691   | C <sub>25</sub> H <sub>20</sub> Cl N O <sub>5</sub> | 449.103  | -0.19      |

| Compound Label                                             | <i>m/z</i> | RT    | Algorithm       | Mass     |
|------------------------------------------------------------|------------|-------|-----------------|----------|
| Cpd 1: C <sub>25</sub> H <sub>20</sub> Cl N O <sub>5</sub> | 450.1099   | 0.201 | Find By Formula | 449.1029 |

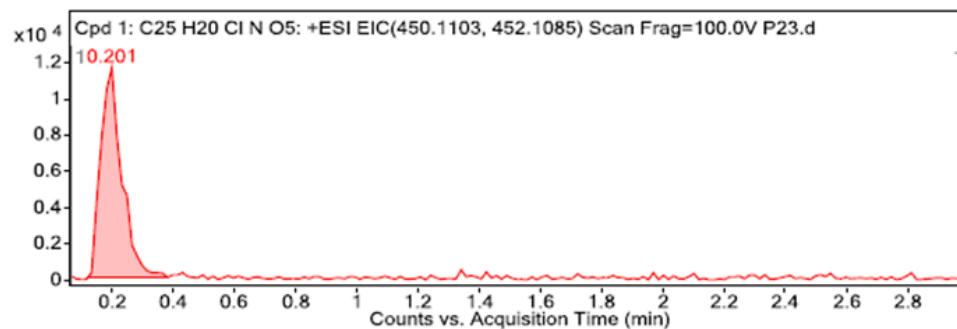

MS Zoomed Spectrum

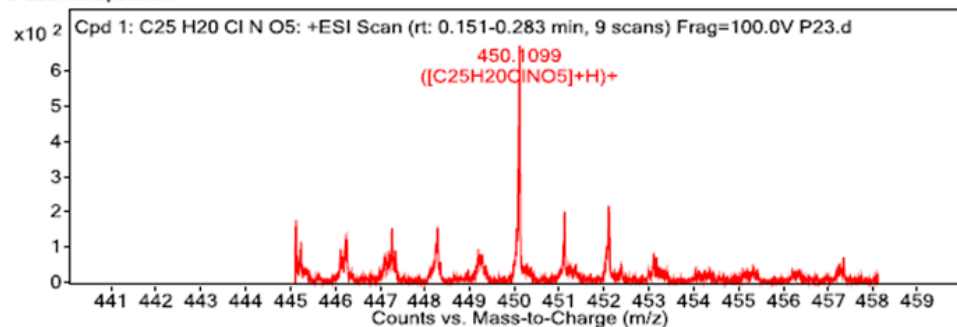

HRMS of (*E*)-4-((5-(((4-chlorophenyl)imino)methyl)-2-methoxy phenoxy)methyl)-7-methoxy-2*H*-chromen-2-one (13i)

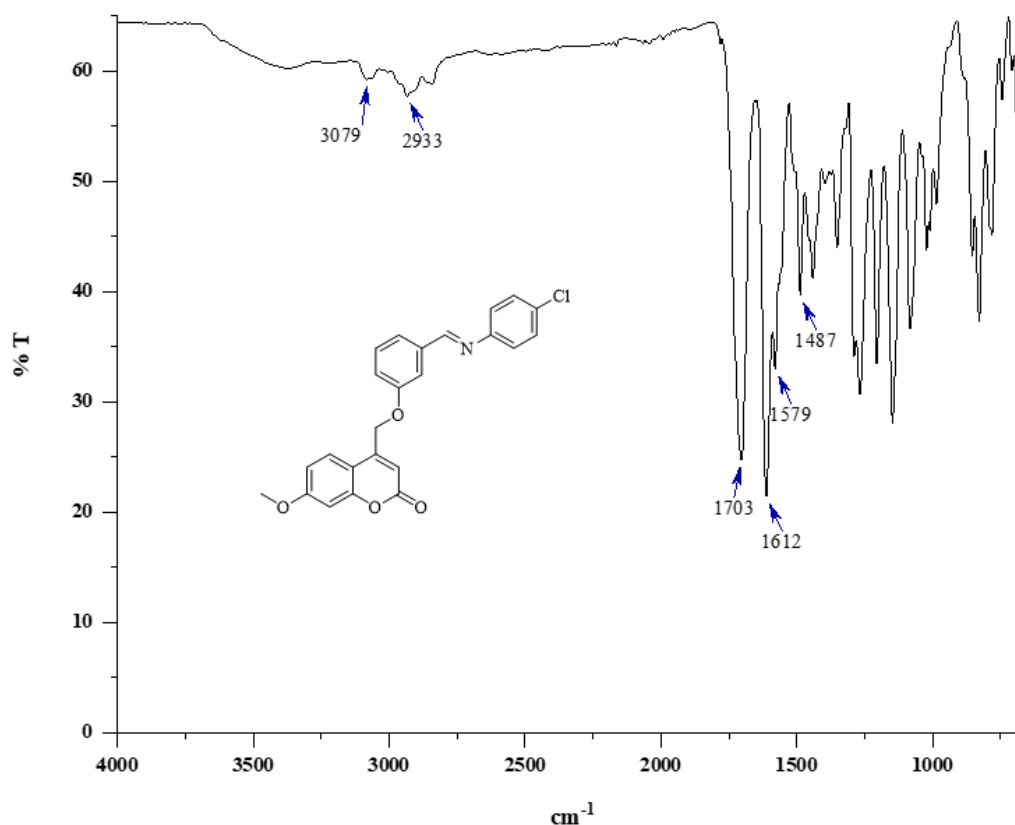

IR spectrum of (*E*)-4-((3-(((4-chlorophenyl)imino)methyl)phenoxy)methyl)-7-methoxy-2*H*-chromen-2-one (13j)

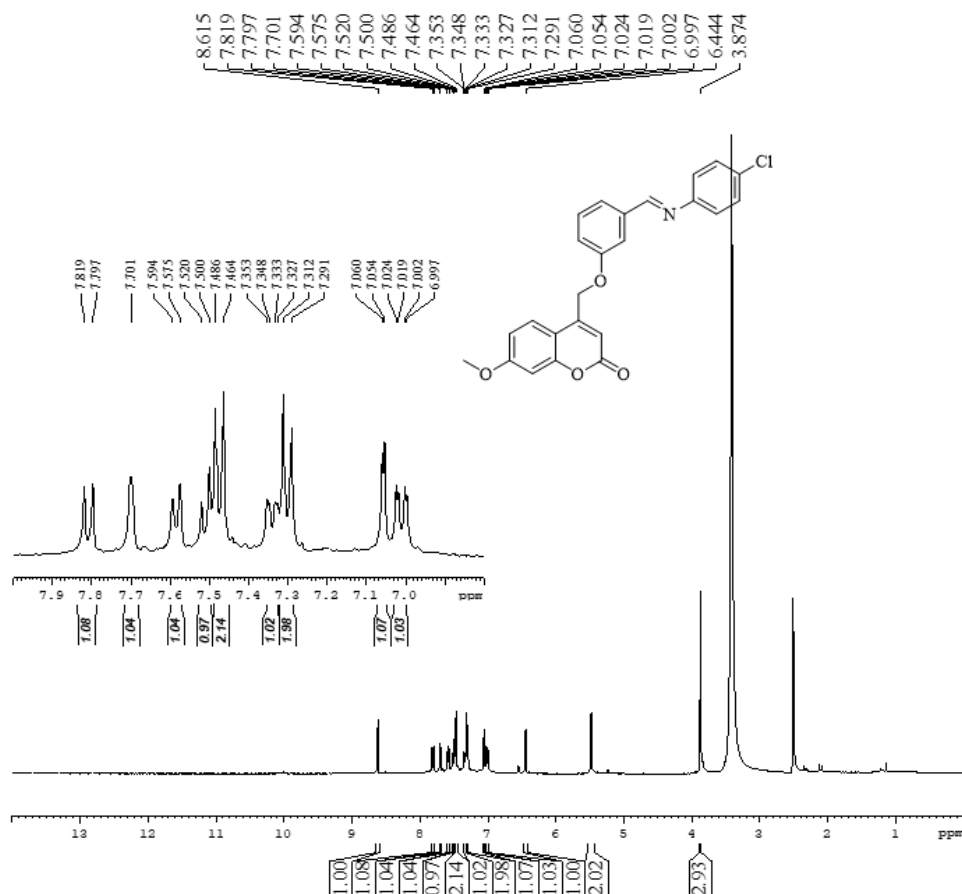

<sup>1</sup>H NMR spectrum of (E)-4-((3-(((4-chlorophenyl)imino)methyl)phenoxy)methyl)-7-methoxy-2H-chromen-2-one (13j)

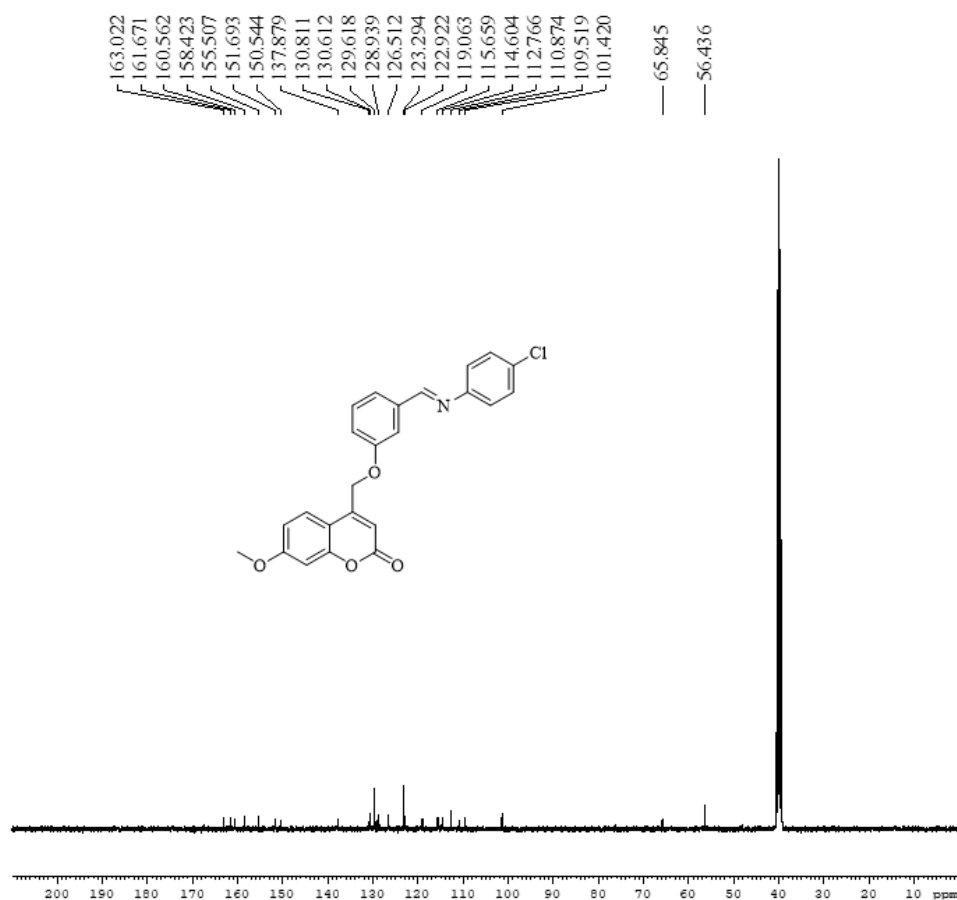

<sup>13</sup>C NMR spectrum of (E)-4-((3-(((4-chlorophenyl)imino)methyl)phenoxy)methyl)-7-methoxy-2H-chromen-2-one (13j)

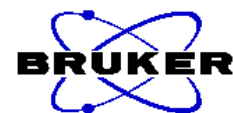

NAME S2470MC-DM50  
EXPNO 1  
PROCNO 1  
Date\_ 20201015  
Time\_ 11.12  
INSTRUM spect  
PROBHD 5 mm PABBO BB-  
PULPROG sg30  
TD 65536  
SOLVENT DMSO  
NS 16  
DS 2  
SWH 8222.685 Hz  
FIDRES 0.125483 Hz  
AQ 3.9846387 sec  
RG 161  
DW 60.800 usec  
DE 6.50 usec  
TE 300.0 K  
D1 1.00000000 sec  
TD0 1

===== CHANNEL f1 =====  
NUC1 1H  
P1 6.00 usec  
PL1 -6.00 dB  
SFO1 400.1324710 MHz  
SI 32768  
SF 400.1300000 MHz  
WDW EM  
SSB 0  
LB 0.30 Hz  
GB 0  
PC 1.00

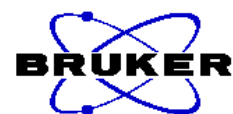

NAME S2470MC-DM50  
EXPNO 5  
PROCNO 1  
Date\_ 20201018  
Time\_ 16.23  
INSTRUM spect  
PROBHD 5 mm PABBO BB-  
PULPROG sgpg30  
TD 65536  
SOLVENT DMSO  
NS 1056  
DS 4  
SWH 24028.461 Hz  
FIDRES 0.366798 Hz  
AQ 1.3631988 sec  
RG 203  
DW 20.800 usec  
DE 6.50 usec  
TE 300.0 K  
D1 2.00000000 sec  
D11 0.03000000 sec  
TD0 1

===== CHANNEL f1 =====  
NUC1 13C  
P1 12.00 usec  
PL1 -1.00 dB  
SFO1 100.6228298 MHz

===== CHANNEL f2 =====  
CPDPRG2 waltz65  
NUC2 1H  
PCPD2 80.00 usec  
PL2 -6.00 dB  
PL12 19.50 dB  
PL13 19.50 dB  
SFO2 400.1316005 MHz  
SI 32768  
SF 100.6127690 MHz  
WDW EM  
SSB 0  
LB 1.00 Hz  
GB 0  
PC 1.40

Compound Table

| Compound Label                                                         | RT    | Mass     | Abund | Formula                                                         | Tgt Mass | Diff (ppm) |
|------------------------------------------------------------------------|-------|----------|-------|-----------------------------------------------------------------|----------|------------|
| Cpd 1: C <sub>24</sub> H <sub>18</sub> ClN <sub>4</sub> O <sub>4</sub> | 0.198 | 419.0908 | 429   | C <sub>24</sub> H <sub>18</sub> ClN <sub>4</sub> O <sub>4</sub> | 419.0924 | -3.79      |

| Compound Label                                                         | <i>m/z</i> | RT    | Algorithm       | Mass     |
|------------------------------------------------------------------------|------------|-------|-----------------|----------|
| Cpd 1: C <sub>24</sub> H <sub>18</sub> ClN <sub>4</sub> O <sub>4</sub> | 420.0972   | 0.198 | Find By Formula | 419.0908 |

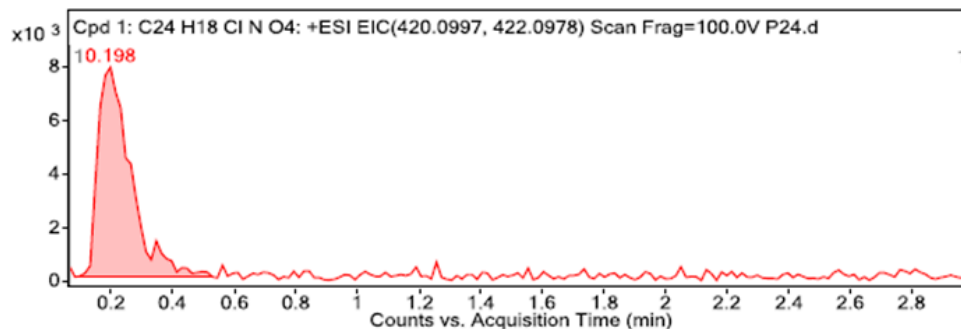

MS Zoomed Spectrum

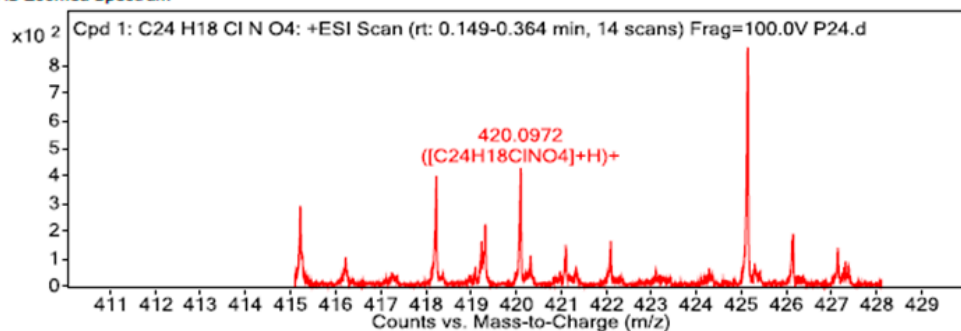

HRMS of (*E*)-4-((3-(((4-chlorophenyl)imino)methyl)phenoxy)methyl)-7-methoxy-2*H*-chromen-2-one (13j)

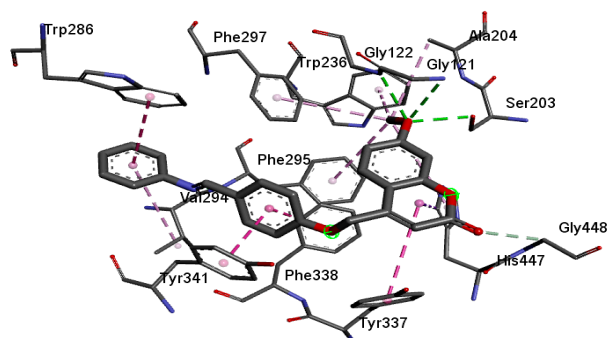

(13a) (3D LIGAND-RECEPTOR)

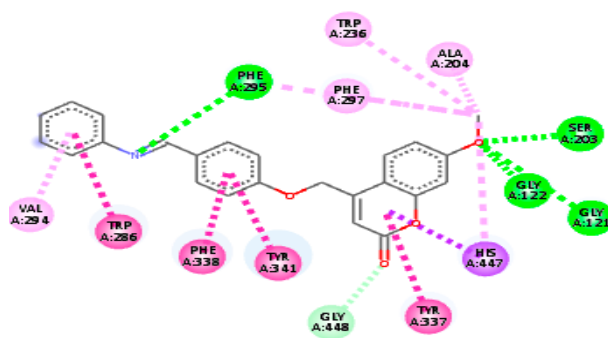

(13a) (2D LIGAND-RECEPTOR)

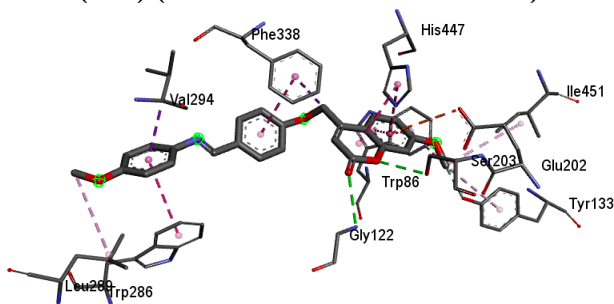

(13b) (3D LIGAND-RECEPTOR)

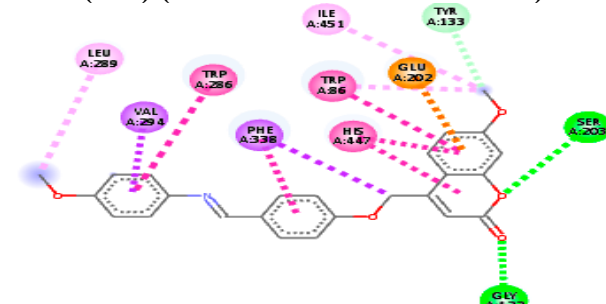

(13b) (2D LIGAND-RECEPTOR)

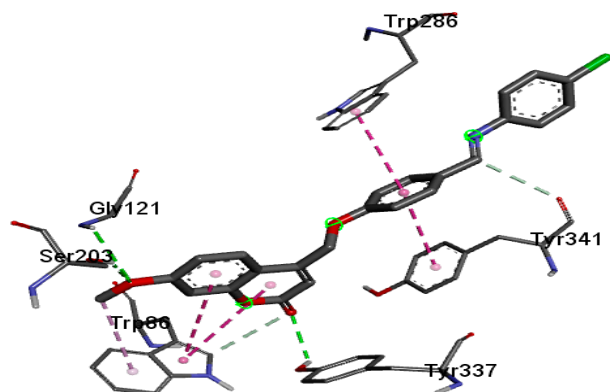

(13c) (3D LIGAND-RECEPTOR)

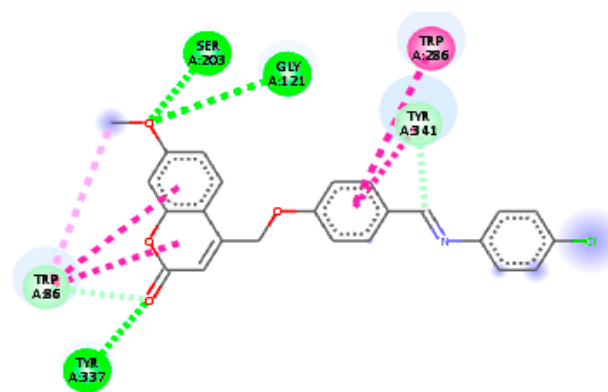

(13c) (2D LIGAND-RECEPTOR)

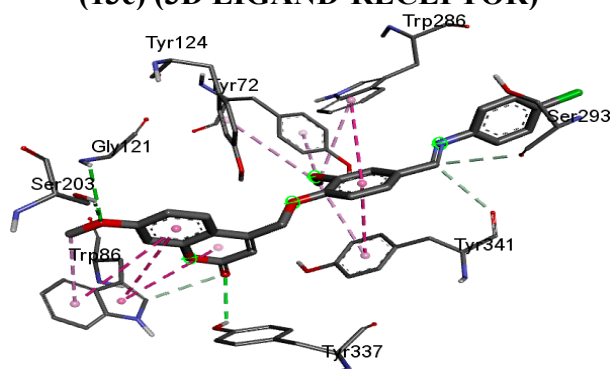

(13d) (3D LIGAND-RECEPTOR)

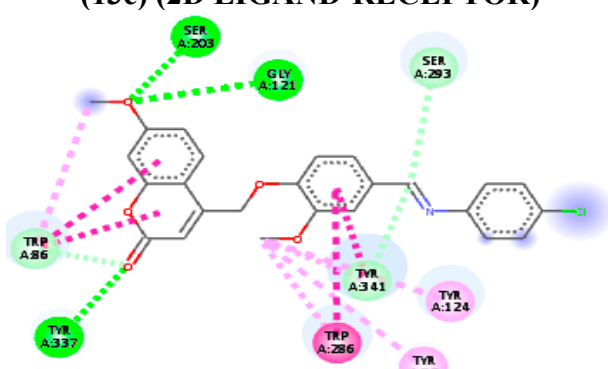

(13d) (2D LIGAND-RECEPTOR)

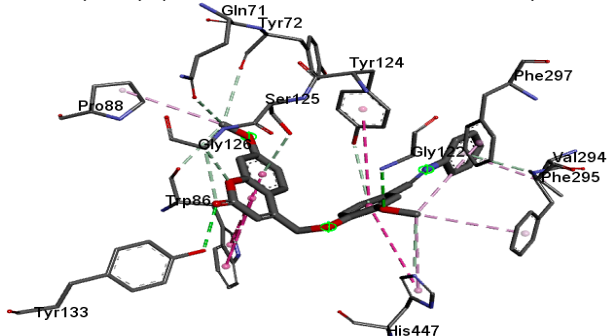

(13e) (3D LIGAND-RECEPTOR)

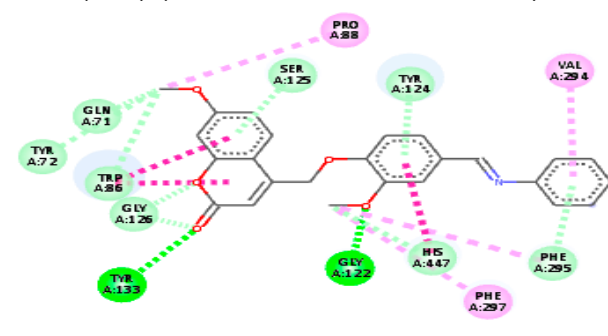

(13e) (2D LIGAND-RECEPTOR)

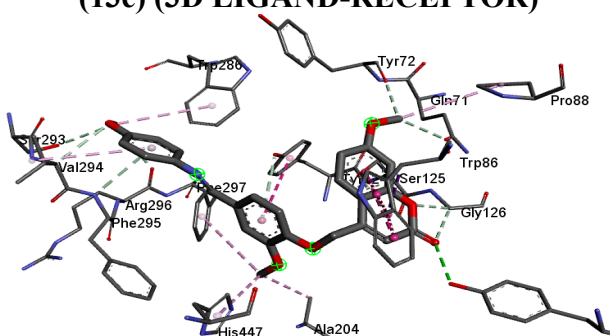

(13f) (3D LIGAND-RECEPTOR)

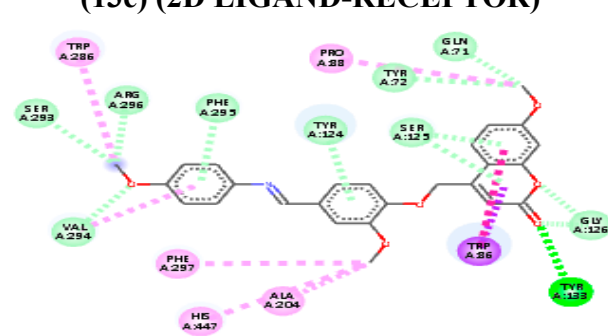

(13f) (2D LIGAND-RECEPTOR)

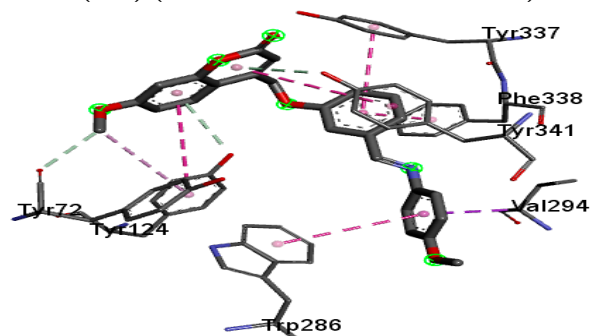

(13g) (3D LIGAND-RECEPTOR)

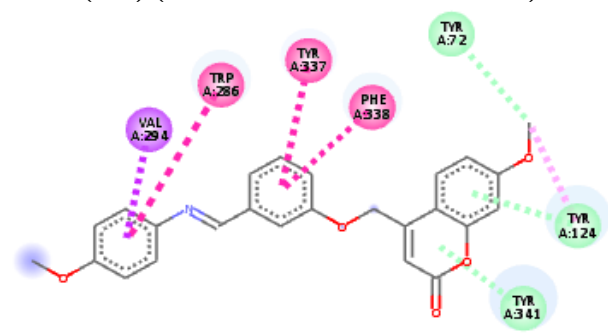

(13g) (2D LIGAND-RECEPTOR)

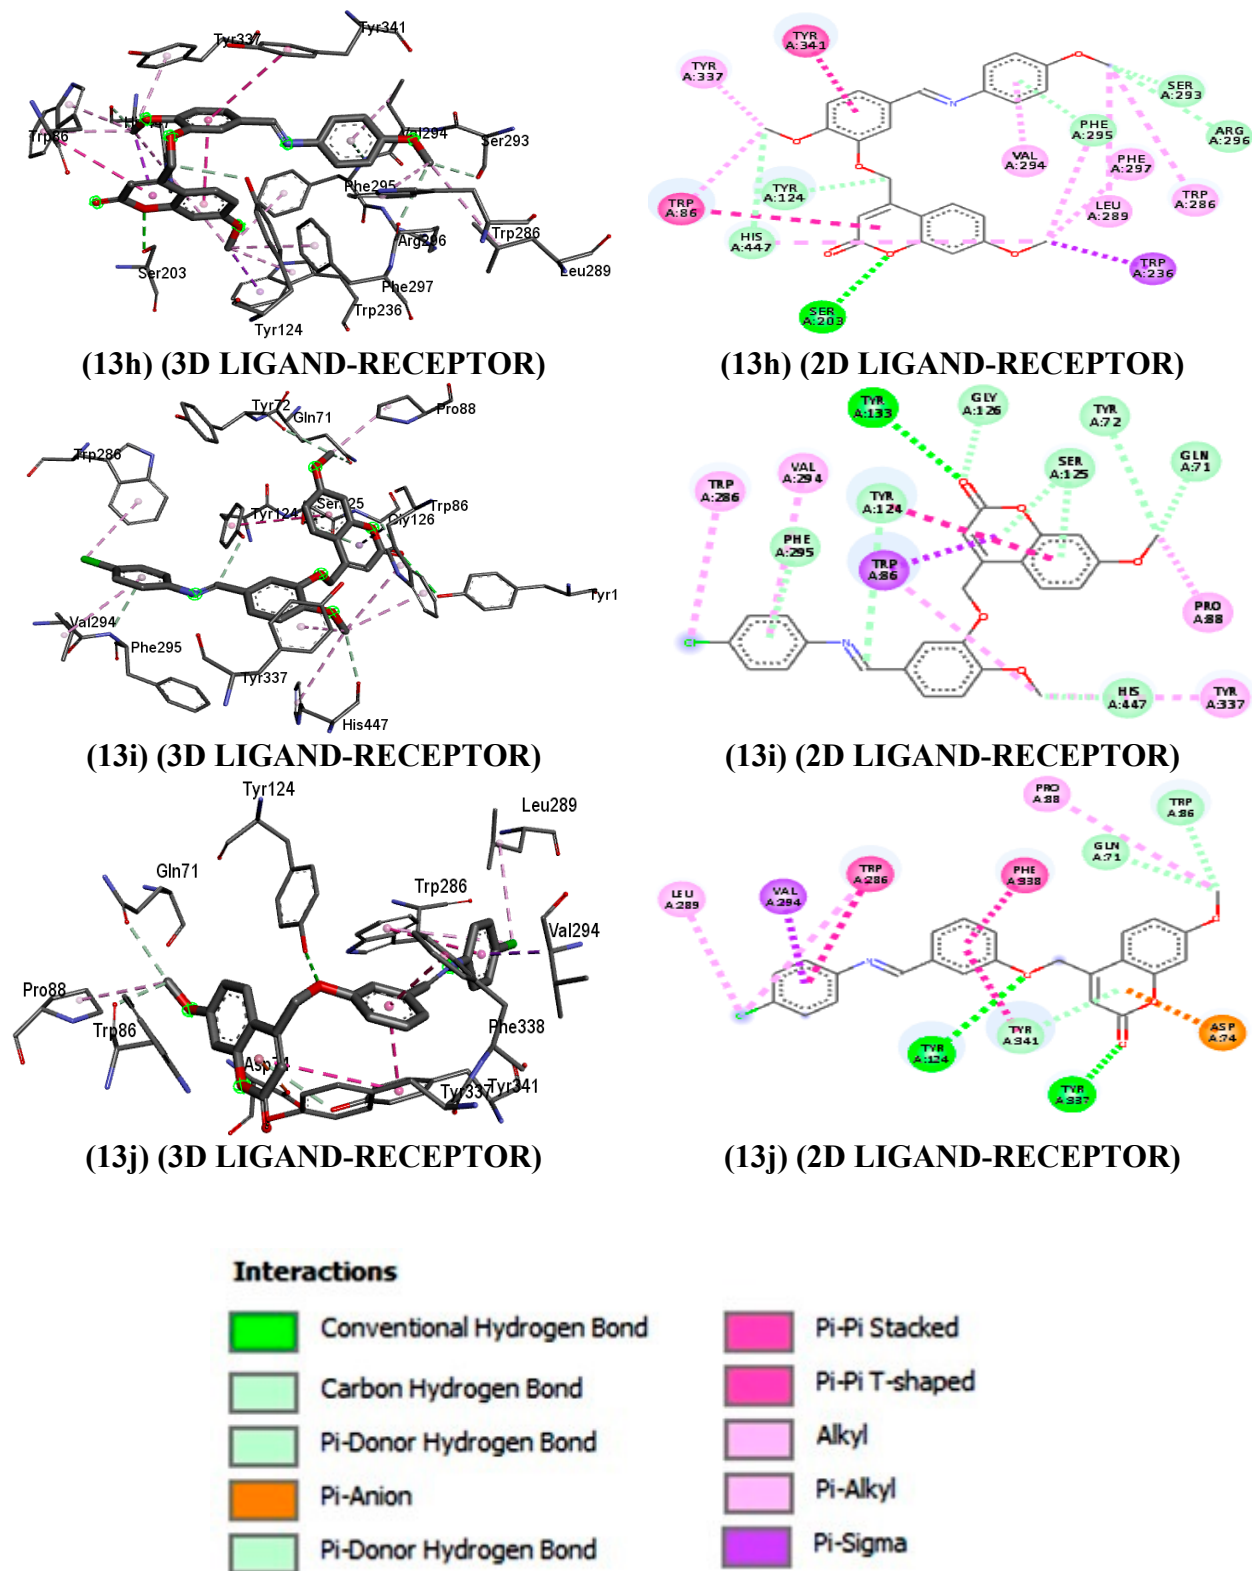

**Figure S1.** The proposed binding mode of newly synthesized hybrids (13a-j) docked in the active site of acetylcholinesterase (4EY7) protein; (2D and 3D ligand-receptor interactions).



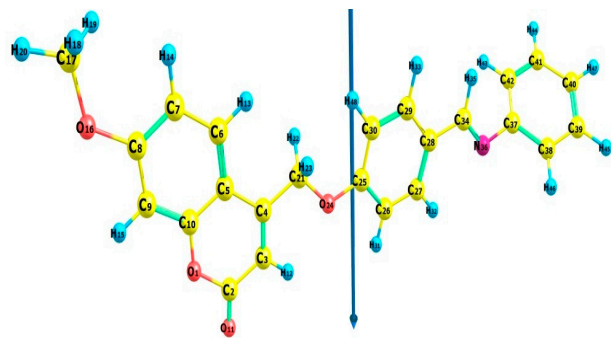

(13a)

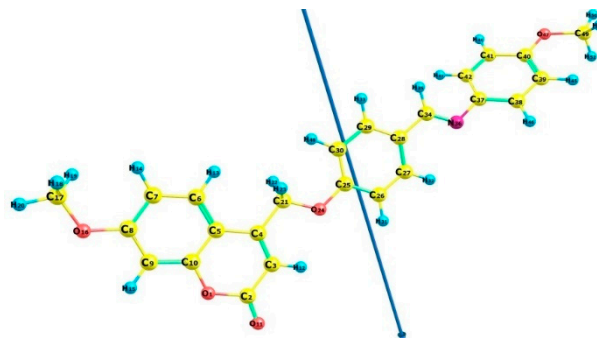

(13b)

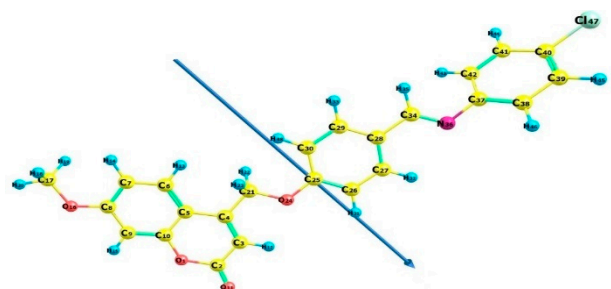

(13c)

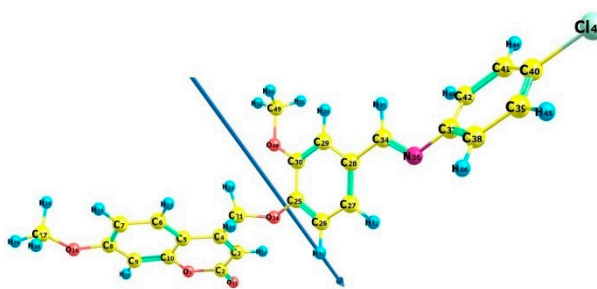

(13d)

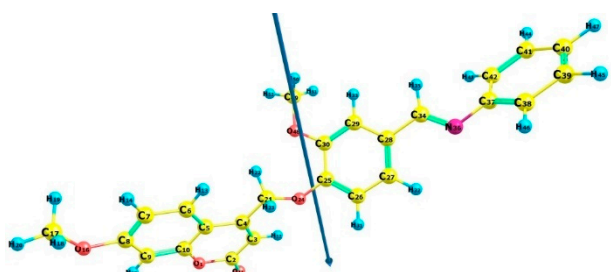

(13e)

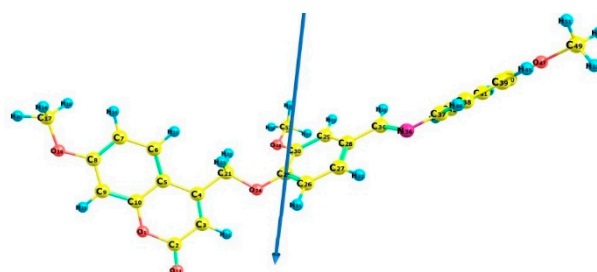

(13f)

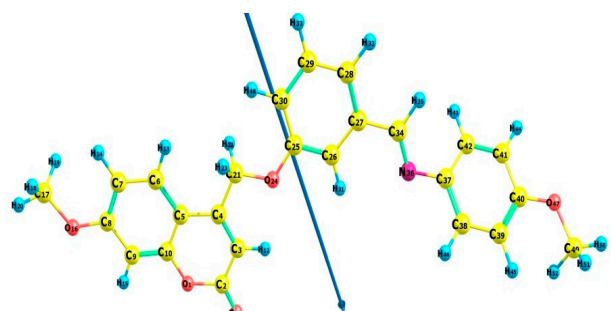

(13g)

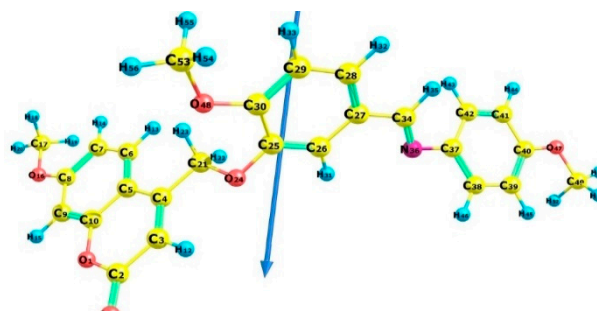

(13h)

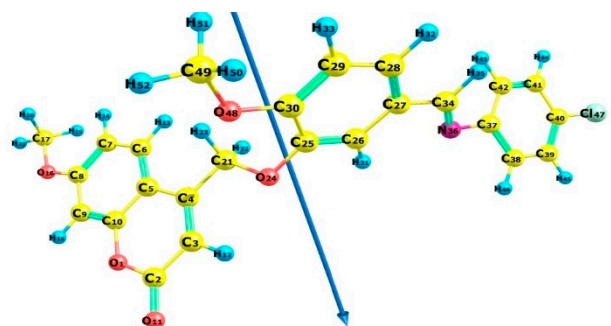

(13i)

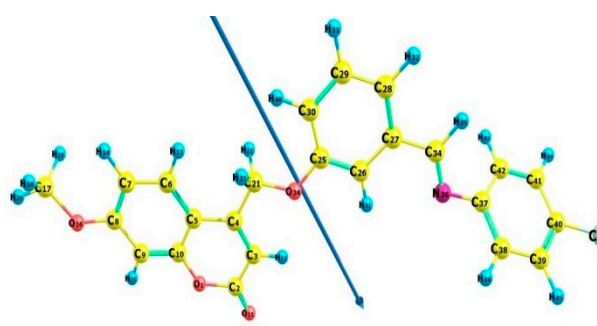

(13j)

**Figure S2.** The optimized geometry, numbering system, vector of dipole moment of the synthesized compounds (13a-j) using wb97xd/6-311++g(d,p) level of calculation.

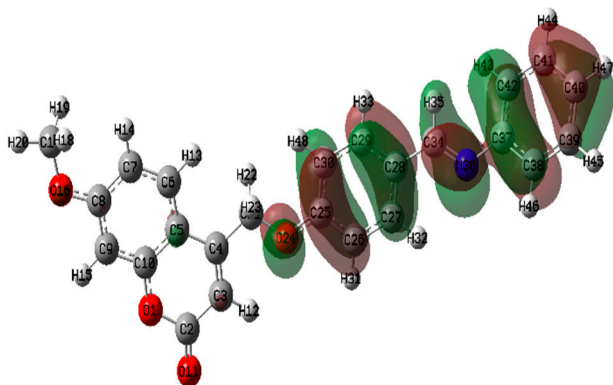

(13a) (HOMO)

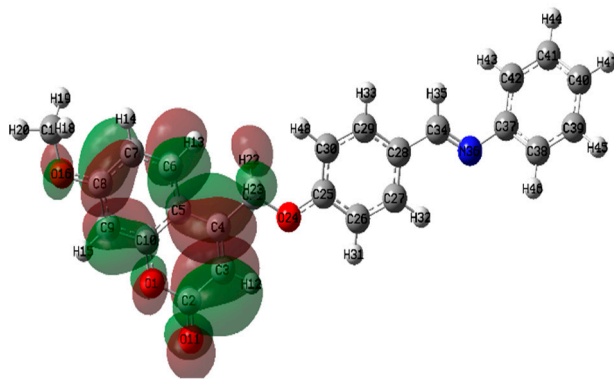

(13a) (LUMO)

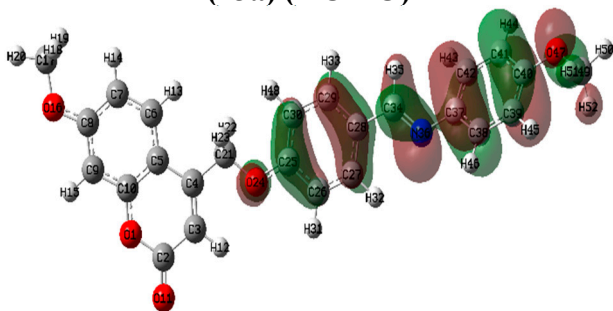

(13b) (HOMO)

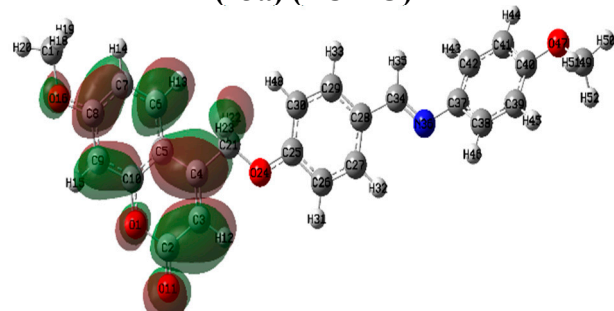

(13b) (LUMO)

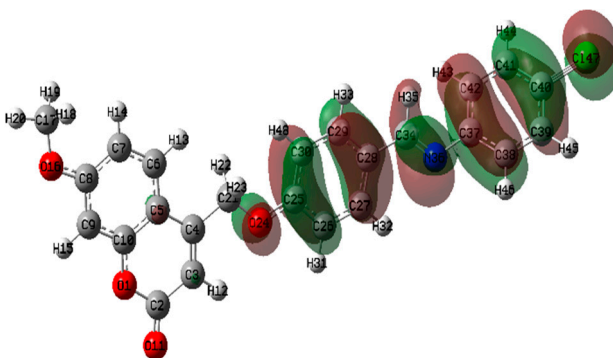

(13c) (HOMO)

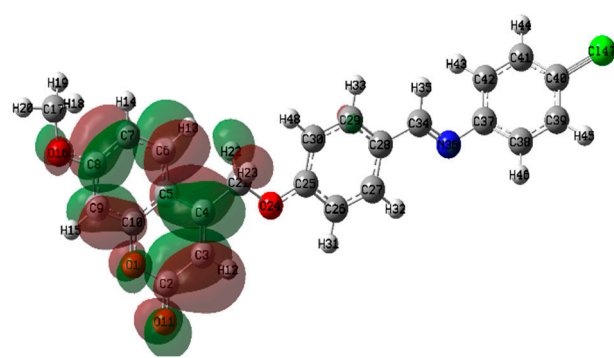

(13c) (LUMO)

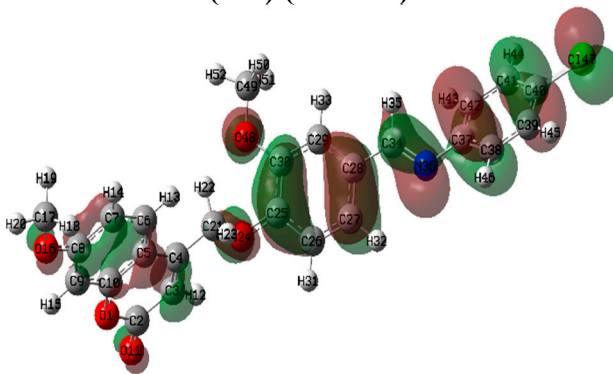

(13d) (HOMO)

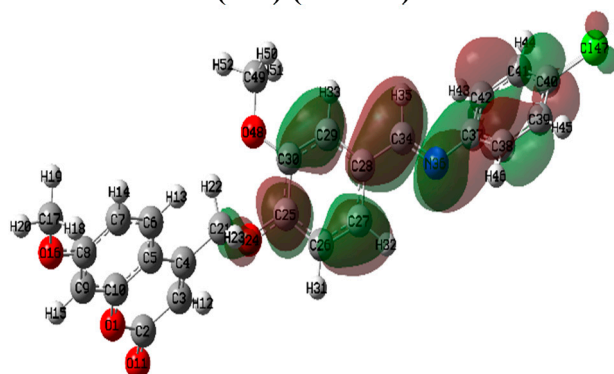

(13d) (LUMO)

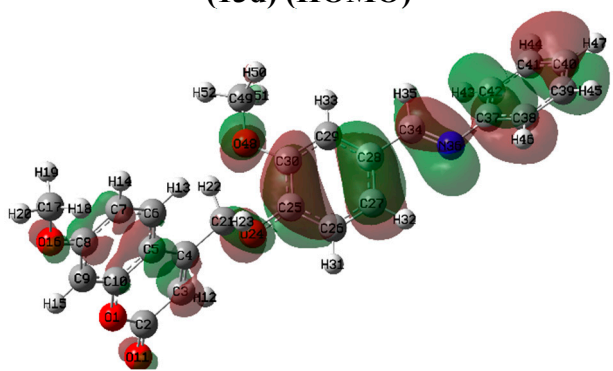

(13e) (HOMO)

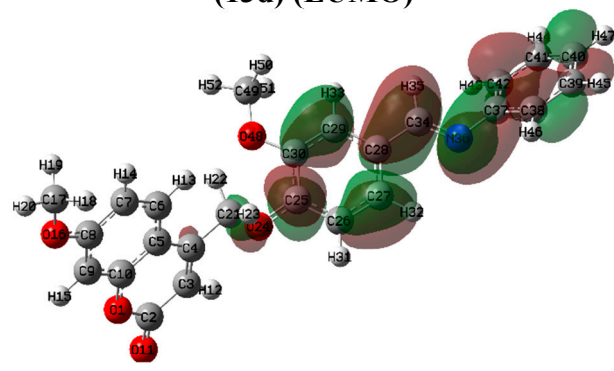

(13e) (LUMO)



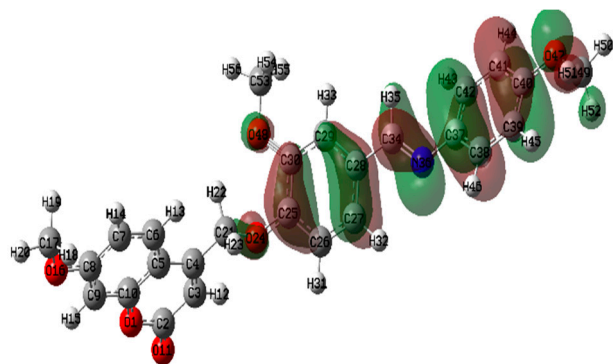

(13f) (HOMO)

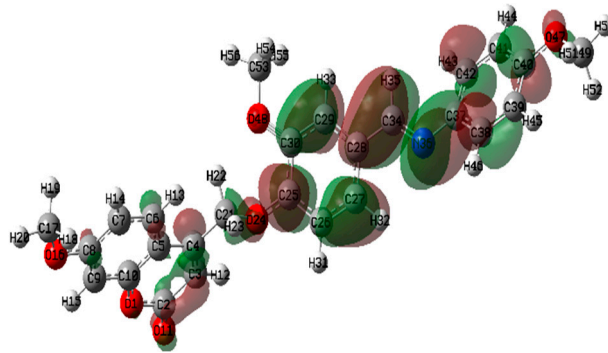

(13f) (LUMO)

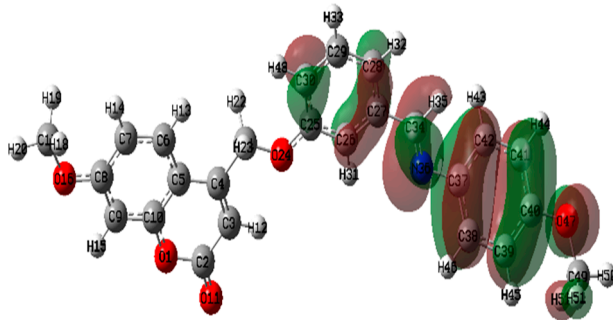

(13g) (HOMO)

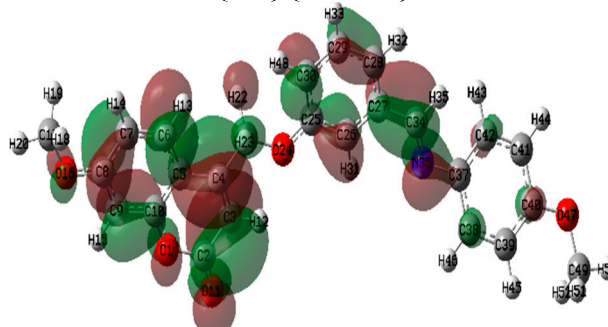

(13g) (LUMO)

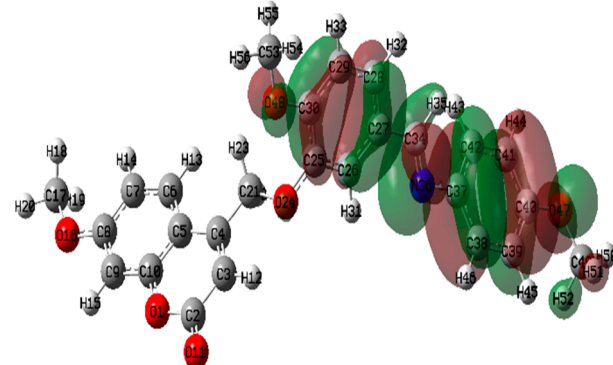

(13h) (HOMO)

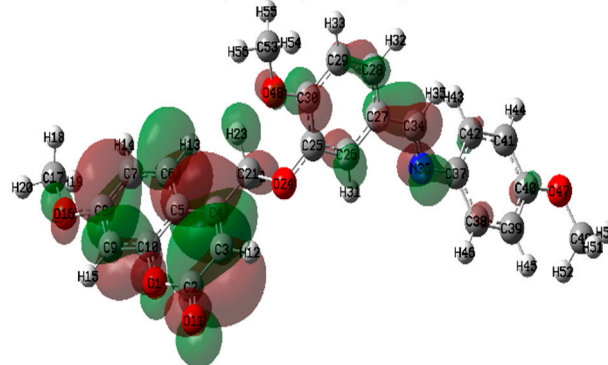

(13h) (LUMO)

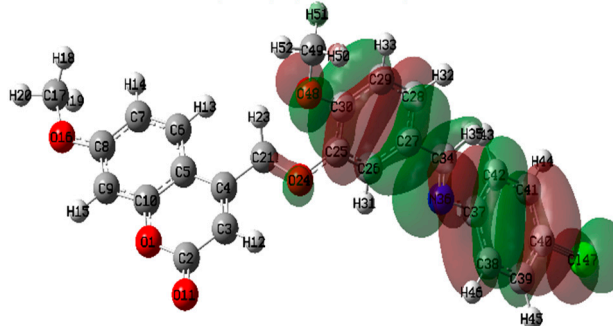

(13i) (HOMO)

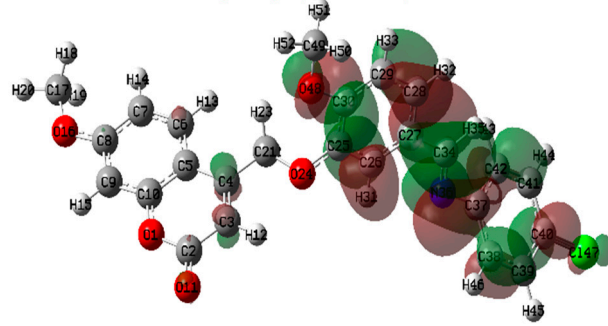

(13i) (LUMO)

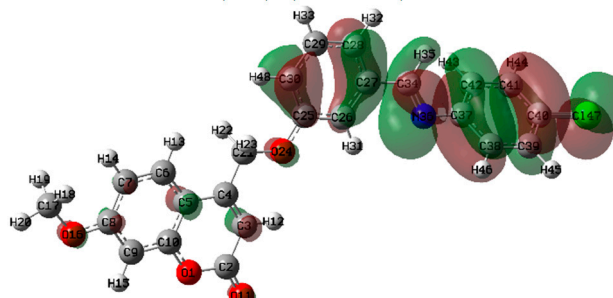

(13j) (HOMO)

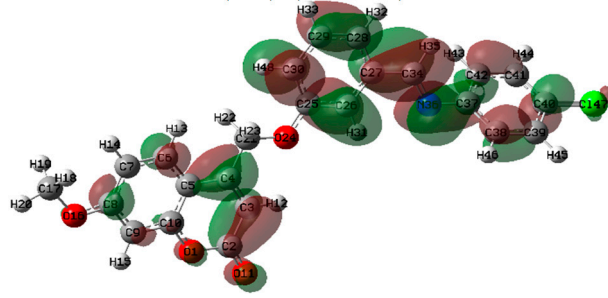

(13j) (LUMO)

**Figure S3.** Frontier molecular orbitals of the synthesized compounds (13a-j) using wb97xd/6-311++g(d,p) level of calculation.

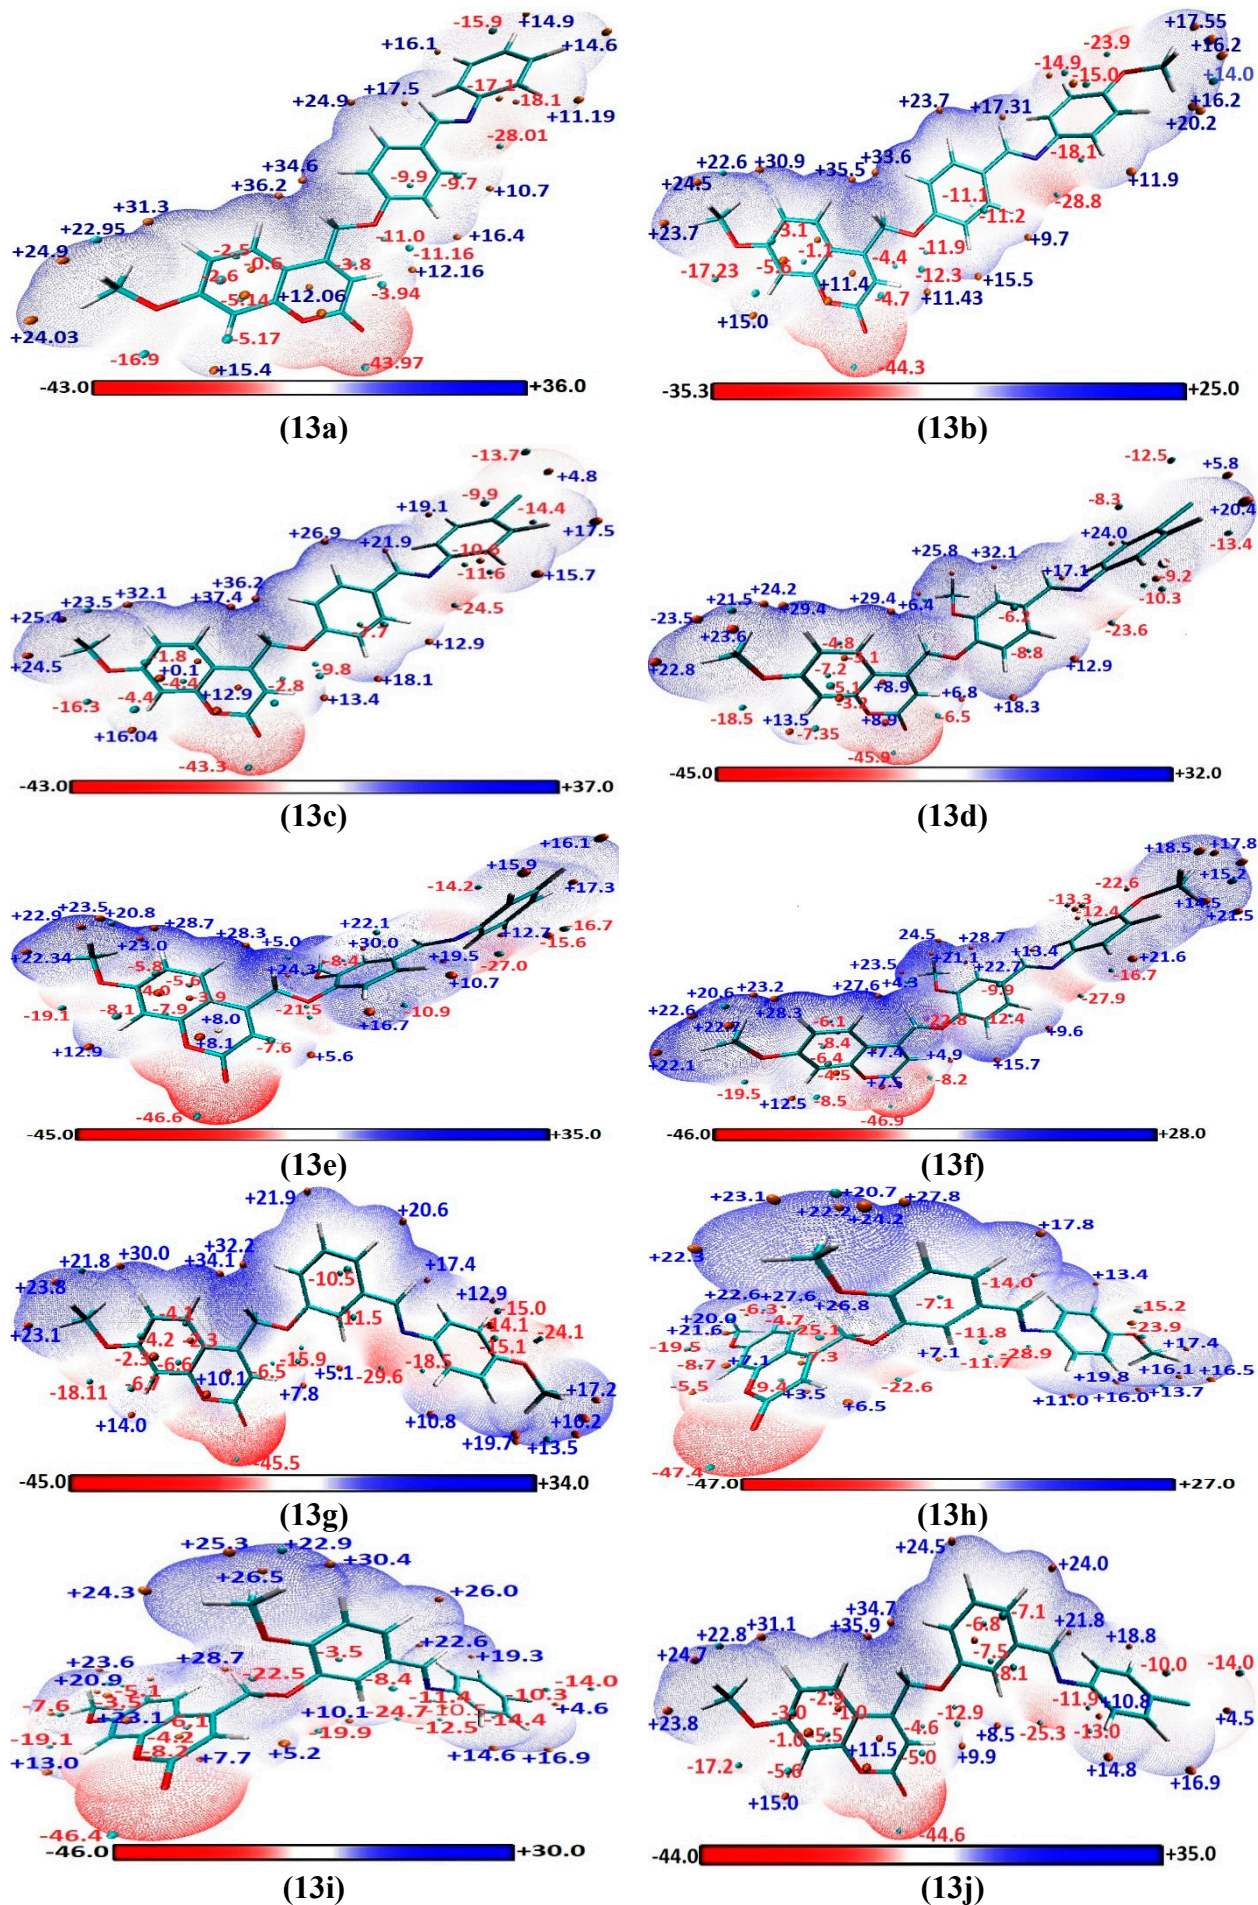

**Figure S4.** MEP surfaces of the synthesized compounds (13a-j) using wb97xd/6-311++g(d,p) level of calculation.



**Table S1.** The selected bond length (Å), bond angles and dihedral angles, (degree) of the newly synthesized compounds (**13a-j**) using wb97xd/6-311++g(d,p) level of level of theory.

|                    | Exp. [6] | 13a    | 13b    | 13c    | 13d    | 13e    | 13f    | 13g    | 13h    | 13i    | 13j    |
|--------------------|----------|--------|--------|--------|--------|--------|--------|--------|--------|--------|--------|
| R(O1,C2)           | 1.383    | 1.380  | 1.380  | 1.380  | 1.381  | 1.381  | 1.381  | 1.381  | 1.382  | 1.382  | 1.381  |
| R(O1,C10)          | 1.360    | 1.356  | 1.356  | 1.356  | 1.356  | 1.356  | 1.356  | 1.356  | 1.356  | 1.356  | 1.356  |
| R(C2,C3)           | 1.450    | 1.457  | 1.457  | 1.458  | 1.456  | 1.456  | 1.456  | 1.458  | 1.456  | 1.456  | 1.458  |
| R(C2,O11)          | 1.204    | 1.198  | 1.198  | 1.198  | 1.198  | 1.198  | 1.198  | 1.198  | 1.198  | 1.198  | 1.198  |
| R(C4,C21)          |          | 1.501  | 1.501  | 1.501  | 1.499  | 1.499  | 1.499  | 1.502  | 1.499  | 1.499  | 1.502  |
| R(C8,C9)           | 1.379    | 1.391  | 1.391  | 1.391  | 1.390  | 1.390  | 1.390  | 1.390  | 1.390  | 1.390  | 1.390  |
| R(C8,O16)          | 1.388    | 1.349  | 1.349  | 1.348  | 1.350  | 1.350  | 1.350  | 1.349  | 1.350  | 1.350  | 1.349  |
| R(C9,C10)          | 1.381    | 1.383  | 1.383  | 1.383  | 1.384  | 1.384  | 1.384  | 1.384  | 1.384  | 1.384  | 1.383  |
| R(O16,C17)         | 1.363    | 1.414  | 1.414  | 1.414  | 1.413  | 1.413  | 1.413  | 1.413  | 1.413  | 1.413  | 1.414  |
| R(C21,O24)         |          | 1.404  | 1.404  | 1.405  | 1.414  | 1.414  | 1.414  | 1.403  | 1.413  | 1.413  | 1.403  |
| R(O24,C25)         |          | 1.357  | 1.358  | 1.356  | 1.365  | 1.365  | 1.366  | 1.361  | 1.369  | 1.367  | 1.360  |
| R(C30,A48)         |          | 1.082  | 1.082  | 1.082  | 1.355  | 1.356  | 1.356  | 1.082  | 1.350  | 1.349  | 1.082  |
| R(C34,N36)         |          | 1.270  | 1.270  | 1.271  | 1.270  | 1.269  | 1.270  | 1.269  | 1.270  | 1.271  | 1.269  |
| R(N36,C37)         |          | 1.407  | 1.408  | 1.405  | 1.405  | 1.407  | 1.408  | 1.408  | 1.408  | 1.405  | 1.406  |
| R(C40,A47)         |          | 1.084  | 1.358  | 1.749  | 1.749  | 1.084  | 1.357  | 1.357  | 1.358  | 1.749  | 1.749  |
| A(C2,O1,C10)       | 122.1    | 122.5  | 122.5  | 122.5  | 122.5  | 122.5  | 122.5  | 122.5  | 122.5  | 122.5  | 122.5  |
| A(O1,C2,C3)        | 117.1    | 116.5  | 116.6  | 116.6  | 116.5  | 116.5  | 116.6  | 116.6  | 116.5  | 116.5  | 116.5  |
| A(O1,C2,O11)       | 117.4    | 117.8  | 117.8  | 117.8  | 117.7  | 117.7  | 117.7  | 117.8  | 117.6  | 117.6  | 117.8  |
| A(C4,C5,C6)        | 125.0    | 125.0  | 125.0  | 124.9  | 124.9  | 124.9  | 124.9  | 124.9  | 124.9  | 124.9  | 124.9  |
| A(C4,C5,C10)       | 117.4    | 117.6  | 117.7  | 117.6  | 117.7  | 117.7  | 117.7  | 117.7  | 117.7  | 117.7  | 117.6  |
| A(C7,C8,O16)       |          | 124.2  | 124.2  | 124.2  | 124.2  | 124.2  | 124.2  | 124.2  | 124.2  | 124.2  | 124.2  |
| A(C8,O16,C17)      | 119.1    | 118.8  | 118.8  | 118.8  | 118.7  | 118.7  | 118.7  | 118.7  | 118.7  | 118.7  | 118.7  |
| A(C4,C21,O24)      |          | 109.8  | 109.9  | 109.9  | 109.7  | 109.7  | 109.7  | 109.9  | 110.1  | 110.0  | 109.8  |
| A(C21,O24,C25)     |          | 118.6  | 118.5  | 118.5  | 116.0  | 115.9  | 115.9  | 118.5  | 114.5  | 114.8  | 118.6  |
| A(O24,C25,C30)     |          | 124.5  | 124.4  | 124.4  | 121.2  | 121.2  | 121.2  | 124.2  | 119.8  | 119.9  | 124.2  |
| A(C25,C26,C27)     |          | 120.1  | 120.1  | 120.1  | 120.9  | 120.9  | 120.9  | 120.0  | 120.6  | 120.6  | 120.0  |
| A(C27,C28,C34)     |          | 121.5  | 121.5  | 121.5  | 121.5  | 121.5  | 121.6  | 120.0  | 119.7  | 119.8  | 120.1  |
| A(C34,N36,C37)     |          | 119.1  | 119.3  | 119.1  | 119.2  | 119.1  | 119.6  | 119.7  | 119.3  | 119.2  | 119.2  |
| A(N36,C37,C38)     |          | 118.3  | 118.4  | 118.4  | 118.2  | 118.2  | 118.1  | 118.0  | 118.5  | 118.4  | 118.3  |
| A(C39,C40,C41)     |          | 119.5  | 119.5  | 120.9  | 120.9  | 119.6  | 119.5  | 119.5  | 119.5  | 120.9  | 121.0  |
| D(C10,O1,C2,O11)   | 180.0    | 179.9  | 179.8  | 179.8  | -179.9 | 180.0  | -179.9 | -179.9 | 179.6  | 179.6  | -180.0 |
| D(C2,C3,C4,C21)    | 179.1    | -179.8 | -179.5 | -179.6 | 180.0  | 180.0  | -180.0 | 179.9  | 179.5  | 179.5  | -179.9 |
| D(C5,C4,C21,O24)   |          | 179.8  | 179.3  | -179.5 | 179.5  | 179.3  | -179.9 | 179.0  | -177.8 | -177.6 | 178.8  |
| D(C4,C5,C6,C7)     | -179.1   | -179.9 | -179.8 | 179.9  | -179.9 | -179.8 | 179.9  | 180.0  | -179.9 | 180.0  | 179.9  |
| D(C4,C5,C10,C9)    | 179.6    | 179.9  | 179.9  | -179.9 | 179.9  | 179.8  | -179.9 | -180.0 | 179.9  | -179.9 | -179.9 |
| D(O16,C8,C9,C10)   | 178.6    | -179.9 | -179.8 | -179.9 | -179.9 | -179.8 | -180.0 | 179.9  | -179.9 | 180.0  | 179.9  |
| D(C7,C8,O16,C17)   |          | 0.3    | 0.0    | 0.4    | -1.2   | -1.4   | -0.8   | 0.3    | -0.3   | 0.1    | 0.4    |
| D(C21,O24,C25,C26) |          | 179.2  | 178.7  | -179.9 | 115.1  | 114.8  | 115.0  | 176.5  | -107.0 | -108.0 | 177.9  |
| D(C26,C27,C28,C34) |          | 180.0  | -180.0 | -179.8 | 180.0  | -179.9 | 179.8  | 180.0  | 180.0  | 179.9  | -180.0 |
| D(C27,C28,C34,N36) |          | -2.8   | -3.9   | -3.3   | -1.1   | -1.0   | -0.6   | 179.9  | 179.5  | 179.5  | 179.8  |
| D(C28,C34,N36,C37) |          | 177.6  | 177.5  | 177.4  | 177.5  | 177.4  | 177.7  | 178.3  | 177.3  | 177.2  | 177.9  |
| D(C34,N36,C37,C42) |          | -47.6  | -42.2  | -47.6  | -44.7  | -45.1  | -38.5  | -39.5  | -41.8  | -46.2  | -46.8  |
| D(N36,C37,C38,C39) |          | 179.9  | -179.7 | 179.9  | -180.0 | 179.9  | -179.6 | -179.4 | -179.8 | 179.6  | 180.0  |

Values are mean  $\pm$  SD triplicate assays.

**Table S2:** Mean absolute errors computed for selected bond lengths (Å) and angles (degree) of synthesized compounds (**13a-j**) versus **7-Acetoxy-coumarin** calculated at long-range corrections wb97xd/6-311++g(d,p) level of theory. The X-ray crystal structure data have been taken from ref. [1]

|                         | <b>13a</b> | <b>13b</b> | <b>13c</b> | <b>13d</b> | <b>13e</b> | <b>13f</b> | <b>13g</b> | <b>13h</b> | <b>13i</b> | <b>13j</b> |
|-------------------------|------------|------------|------------|------------|------------|------------|------------|------------|------------|------------|
| <b>R(O1,C2)</b>         | 0.003      | 0.002      | 0.003      | 0.002      | 0.001      | 0.001      | 0.002      | 0.001      | 0.001      | 0.002      |
| <b>R(O1,C10)</b>        | 0.004      | 0.004      | 0.004      | 0.004      | 0.004      | 0.004      | 0.004      | 0.004      | 0.004      | 0.004      |
| <b>R(C2,C3)</b>         | 0.007      | 0.007      | 0.008      | 0.006      | 0.006      | 0.006      | 0.008      | 0.006      | 0.006      | 0.008      |
| <b>R(C2,O11)</b>        | 0.007      | 0.007      | 0.007      | 0.006      | 0.006      | 0.006      | 0.007      | 0.006      | 0.006      | 0.007      |
| <b>R(C8,C9)</b>         | 0.012      | 0.012      | 0.012      | 0.011      | 0.011      | 0.011      | 0.011      | 0.011      | 0.011      | 0.011      |
| <b>R(C8,O16)</b>        | 0.039      | 0.039      | 0.039      | 0.038      | 0.038      | 0.038      | 0.039      | 0.038      | 0.038      | 0.039      |
| <b>R(C9,C10)</b>        | 0.002      | 0.002      | 0.002      | 0.003      | 0.003      | 0.003      | 0.002      | 0.003      | 0.003      | 0.002      |
| <b>R(O16,C17)</b>       | 0.051      | 0.051      | 0.051      | 0.050      | 0.050      | 0.050      | 0.050      | 0.050      | 0.050      | 0.051      |
|                         |            |            |            |            |            |            |            |            |            |            |
| <b>A(C2,O1,C10)</b>     | 0.436      | 0.427      | 0.434      | 0.385      | 0.389      | 0.375      | 0.423      | 0.402      | 0.414      | 0.444      |
| <b>A(O1,C2,C3)</b>      | 0.562      | 0.551      | 0.549      | 0.554      | 0.557      | 0.548      | 0.540      | 0.555      | 0.561      | 0.555      |
| <b>A(O1,C2,O11)</b>     | 0.450      | 0.430      | 0.462      | 0.306      | 0.289      | 0.273      | 0.370      | 0.231      | 0.263      | 0.395      |
| <b>A(C4,C5,C6)</b>      | 0.014      | 0.059      | 0.069      | 0.124      | 0.140      | 0.132      | 0.082      | 0.142      | 0.123      | 0.068      |
| <b>A(C4,C5,C10)</b>     | 0.250      | 0.277      | 0.271      | 0.301      | 0.308      | 0.313      | 0.293      | 0.317      | 0.301      | 0.272      |
| <b>A(C8,O16,C17)</b>    | 0.337      | 0.331      | 0.325      | 0.398      | 0.374      | 0.433      | 0.407      | 0.410      | 0.392      | 0.388      |
|                         |            |            |            |            |            |            |            |            |            |            |
| <b>D(C10,O1,C2,O11)</b> | 0.037      | 0.137      | 0.148      | 0.042      | 0.025      | 0.040      | 0.035      | 0.315      | 0.352      | 0.004      |
| <b>D(C2,C3,C4,C21)</b>  | 0.697      | 0.422      | 0.545      | 0.907      | 0.955      | 0.904      | 0.819      | 0.415      | 0.468      | 0.855      |
| <b>D(C4,C5,C6,C7)</b>   | 0.778      | 0.736      | 0.843      | 0.812      | 0.718      | 0.841      | 0.911      | 0.786      | 0.890      | 0.864      |
| <b>D(C4,C5,C10,C9)</b>  | 0.333      | 0.322      | 0.338      | 0.341      | 0.250      | 0.390      | 0.417      | 0.370      | 0.359      | 0.362      |
| <b>D(O16,C8,C9,C10)</b> | 1.267      | 1.200      | 1.314      | 1.266      | 1.187      | 1.353      | 1.281      | 1.314      | 1.354      | 1.267      |

**Table S3.** Values of the Fukui functions and dual descriptor of compounds (**13a-e**) by using wb97xd/6-311++g(d,p) level of theory

|      | (13a)        |              |               | (13b)        |              |               | (13c)        |        |               | (13d)        |              |               | (13e)  |        |            |
|------|--------------|--------------|---------------|--------------|--------------|---------------|--------------|--------|---------------|--------------|--------------|---------------|--------|--------|------------|
| Atom | f(-)         | f(+)         | $\Delta f$    | f(-)         | f(+)         | $\Delta f$    | f(-)         | f(+)   | $\Delta f$    | f(-)         | f(+)         | $\Delta f$    | f(-)   | f(+)   | $\Delta f$ |
| O1   | 0.000        | <b>0.021</b> | <b>0.021</b>  | 0.000        | <b>0.021</b> | <b>0.021</b>  | 0.000        | 0.021  | 0.020         | 0.001        | 0.000        | -0.001        | 0.001  | 0.000  | -0.001     |
| C2   | 0.000        | <b>0.084</b> | <b>0.084</b>  | 0.000        | <b>0.084</b> | <b>0.084</b>  | 0.000        | 0.084  | 0.083         | 0.001        | 0.001        | 0.000         | 0.001  | 0.001  | 0.001      |
| C3   | 0.004        | <b>0.199</b> | <b>0.195</b>  | 0.000        | <b>0.198</b> | <b>0.198</b>  | 0.003        | 0.198  | 0.194         | 0.011        | 0.007        | -0.003        | 0.007  | 0.009  | 0.002      |
| C4   | 0.001        | <b>0.209</b> | <b>0.208</b>  | 0.000        | <b>0.209</b> | <b>0.209</b>  | 0.001        | 0.207  | 0.206         | 0.016        | -0.003       | -0.019        | 0.018  | 0.000  | -0.017     |
| C6   | 0.001        | <b>0.166</b> | <b>0.165</b>  | 0.000        | <b>0.167</b> | <b>0.167</b>  | 0.001        | 0.164  | 0.163         | 0.004        | -0.004       | -0.008        | 0.003  | -0.003 | -0.006     |
| C8   | 0.003        | <b>0.082</b> | <b>0.080</b>  | 0.000        | <b>0.083</b> | <b>0.083</b>  | 0.003        | 0.081  | 0.078         | 0.010        | -0.001       | -0.011        | 0.008  | -0.001 | -0.008     |
| C9   | 0.001        | <b>0.052</b> | <b>0.051</b>  | 0.000        | <b>0.052</b> | <b>0.052</b>  | 0.001        | 0.051  | 0.050         | 0.004        | 0.001        | -0.003        | 0.003  | 0.002  | -0.002     |
| C10  | 0.001        | <b>0.035</b> | <b>0.034</b>  | 0.000        | <b>0.035</b> | <b>0.035</b>  | 0.001        | 0.035  | 0.034         | 0.005        | 0.002        | -0.002        | 0.004  | 0.003  | -0.001     |
| O11  | 0.002        | 0.065        | 0.063         | 0.000        | <b>0.065</b> | <b>0.065</b>  | 0.002        | 0.065  | 0.063         | 0.007        | 0.000        | -0.007        | 0.006  | 0.001  | -0.005     |
| O16  | 0.002        | <b>0.011</b> | <b>0.009</b>  | 0.000        | <b>0.011</b> | <b>0.011</b>  | 0.002        | 0.011  | 0.009         | 0.009        | 0.000        | -0.009        | 0.007  | 0.000  | -0.007     |
| C21  | 0.001        | -0.039       | -0.039        | 0.000        | -0.038       | -0.039        | 0.001        | -0.040 | -0.041        | -0.001       | 0.004        | 0.005         | -0.003 | 0.002  | 0.004      |
| O24  | <b>0.051</b> | 0.001        | <b>-0.050</b> | <b>0.021</b> | 0.001        | <b>-0.019</b> | 0.043        | 0.001  | -0.042        | 0.029        | 0.006        | -0.023        | 0.033  | 0.006  | -0.027     |
| C25  | <b>0.073</b> | 0.004        | <b>-0.069</b> | <b>0.036</b> | 0.004        | <b>-0.033</b> | 0.061        | 0.004  | -0.057        | 0.093        | 0.112        | 0.019         | 0.109  | 0.117  | 0.009      |
| C26  | <b>0.027</b> | 0.000        | <b>-0.027</b> | <b>0.009</b> | 0.000        | <b>-0.009</b> | 0.022        | 0.000  | -0.022        | 0.010        | 0.010        | 0.000         | 0.010  | 0.013  | 0.004      |
| C27  | <b>0.008</b> | 0.001        | <b>-0.008</b> | <b>0.011</b> | 0.001        | <b>-0.010</b> | 0.008        | 0.001  | -0.008        | 0.073        | 0.085        | 0.012         | 0.086  | 0.089  | 0.003      |
| C28  | <b>0.096</b> | 0.000        | <b>-0.096</b> | <b>0.047</b> | 0.000        | <b>-0.047</b> | 0.083        | 0.001  | -0.082        | 0.068        | 0.082        | 0.014         | 0.077  | 0.087  | 0.010      |
| C29  | <b>0.037</b> | 0.002        | <b>-0.035</b> | <b>0.025</b> | 0.002        | <b>-0.023</b> | 0.031        | 0.004  | -0.027        | -0.008       | 0.075        | 0.083         | -0.010 | 0.073  | 0.083      |
| C30  | <b>0.040</b> | 0.003        | <b>-0.038</b> | <b>0.015</b> | 0.003        | <b>-0.013</b> | 0.034        | 0.002  | -0.031        | 0.042        | 0.023        | -0.019        | 0.052  | 0.025  | -0.027     |
| C34  | <b>0.021</b> | 0.002        | <b>-0.020</b> | <b>0.052</b> | 0.001        | <b>-0.051</b> | <b>0.021</b> | 0.005  | <b>-0.016</b> | 0.027        | <b>0.238</b> | <b>0.211</b>  | 0.029  | 0.229  | 0.200      |
| N36  | <b>0.141</b> | 0.001        | <b>-0.141</b> | <b>0.103</b> | 0.000        | <b>-0.103</b> | <b>0.128</b> | 0.002  | <b>-0.126</b> | 0.104        | <b>0.164</b> | <b>0.060</b>  | 0.114  | 0.168  | 0.053      |
| C37  | <b>0.129</b> | 0.000        | <b>-0.129</b> | <b>0.144</b> | 0.000        | <b>-0.144</b> | <b>0.125</b> | 0.000  | <b>-0.125</b> | <b>0.092</b> | 0.051        | <b>-0.041</b> | 0.093  | 0.043  | -0.050     |
| C38  | <b>0.089</b> | 0.000        | <b>-0.089</b> | <b>0.092</b> | 0.000        | <b>-0.092</b> | <b>0.078</b> | 0.000  | <b>-0.077</b> | <b>0.060</b> | 0.016        | <b>-0.045</b> | 0.067  | 0.017  | -0.050     |
| C39  | <b>0.016</b> | 0.000        | <b>-0.016</b> | <b>0.055</b> | 0.000        | <b>-0.055</b> | <b>0.023</b> | 0.000  | <b>-0.024</b> | <b>0.018</b> | 0.001        | <b>-0.017</b> | 0.012  | 0.006  | -0.007     |
| C40  | <b>0.138</b> | 0.000        | <b>-0.138</b> | <b>0.133</b> | 0.000        | <b>-0.133</b> | <b>0.128</b> | 0.001  | <b>-0.128</b> | <b>0.101</b> | 0.052        | <b>-0.049</b> | 0.107  | 0.050  | -0.058     |
| C41  | <b>0.032</b> | 0.000        | <b>-0.032</b> | <b>0.078</b> | 0.000        | <b>-0.078</b> | <b>0.039</b> | 0.000  | <b>-0.039</b> | <b>0.034</b> | 0.017        | <b>-0.017</b> | 0.029  | 0.007  | -0.022     |
| C42  | <b>0.058</b> | 0.000        | <b>-0.058</b> | <b>0.038</b> | 0.000        | <b>-0.038</b> | <b>0.057</b> | 0.000  | <b>-0.056</b> | <b>0.050</b> | 0.032        | <b>-0.018</b> | 0.052  | 0.029  | -0.023     |
| A47  | 0.001        | 0            | -0.001        | 0.1063       | 0            | -0.1063       | 0.0796       | 0.0001 | -0.0795       | 0.0622       | 0.0066       | -0.0556       | 0.0008 | 0.0007 | -0.0001    |
| A48  | 0.0005       | 0.0001       | -0.0004       | 0.0002       | 0.0003       | 0.0001        | 0.0004       | 0.0001 | -0.0003       | 0.0333       | 0.0006       | -0.0327       | 0.0402 | 0.0006 | -0.0396    |

A = H, O or Cl which different atom in derivatives series; Values are mean  $\pm$  SD triplicate assays.

**Table S4.** Values of the Fukui functions and dual descriptor of compounds (**13f-j**) by using wb97xd/6-311++g(d,p) level of theory.

|      | (13f)  |        |            | (13g)  |        |            | (13h)  |        |            | (13i)  |        |            | (13j)  |        |            |
|------|--------|--------|------------|--------|--------|------------|--------|--------|------------|--------|--------|------------|--------|--------|------------|
| Atom | f(-)   | f(+)   | $\Delta f$ |
| O1   | 0.000  | 0.001  | 0.001      | 0.000  | 0.016  | 0.016      | 0.000  | 0.017  | 0.017      | 0.000  | 0.001  | 0.001      | 0.000  | 0.004  | 0.003      |
| C2   | 0.000  | 0.005  | 0.005      | 0.000  | 0.063  | 0.063      | 0.000  | 0.073  | 0.073      | 0.001  | 0.003  | 0.002      | 0.000  | 0.013  | 0.013      |
| C3   | 0.000  | 0.017  | 0.017      | 0.000  | 0.153  | 0.153      | -0.001 | 0.163  | 0.164      | -0.001 | 0.005  | 0.007      | 0.008  | 0.036  | 0.027      |
| C4   | 0.001  | 0.009  | 0.008      | 0.000  | 0.162  | 0.162      | 0.000  | 0.183  | 0.183      | 0.000  | -0.001 | -0.001     | 0.002  | 0.038  | 0.037      |
| C6   | 0.001  | 0.004  | 0.004      | 0.000  | 0.121  | 0.121      | 0.000  | 0.152  | 0.152      | 0.001  | 0.009  | 0.008      | 0.001  | 0.023  | 0.021      |
| C8   | 0.000  | 0.002  | 0.002      | 0.000  | 0.062  | 0.062      | 0.000  | 0.073  | 0.073      | 0.000  | 0.002  | 0.002      | 0.005  | 0.012  | 0.008      |
| C9   | 0.000  | 0.004  | 0.004      | 0.000  | 0.038  | 0.038      | 0.000  | 0.048  | 0.048      | 0.000  | 0.001  | 0.001      | 0.002  | 0.007  | 0.005      |
| C10  | 0.000  | 0.004  | 0.004      | 0.000  | 0.028  | 0.028      | 0.000  | 0.029  | 0.029      | 0.000  | -0.004 | -0.003     | 0.002  | 0.007  | 0.005      |
| O11  | 0.000  | 0.004  | 0.004      | 0.000  | 0.049  | 0.049      | 0.000  | 0.056  | 0.056      | 0.000  | 0.002  | 0.002      | 0.004  | 0.011  | 0.007      |
| O16  | 0.000  | 0.001  | 0.000      | 0.000  | 0.009  | 0.009      | 0.000  | 0.010  | 0.010      | 0.000  | 0.000  | 0.000      | 0.004  | 0.002  | -0.002     |
| C21  | 0.007  | -0.001 | -0.008     | 0.000  | -0.040 | -0.040     | 0.002  | -0.036 | -0.039     | 0.005  | 0.013  | 0.008      | 0.000  | -0.017 | -0.017     |
| O24  | 0.014  | 0.006  | -0.008     | 0.001  | 0.002  | 0.001      | 0.002  | 0.001  | -0.002     | 0.007  | 0.001  | -0.006     | 0.006  | 0.001  | -0.005     |
| C25  | 0.051  | 0.116  | 0.065      | -0.001 | 0.003  | 0.005      | 0.011  | 0.005  | -0.006     | 0.029  | 0.004  | -0.025     | 0.005  | 0.007  | 0.003      |
| C26  | 0.003  | 0.015  | 0.012      | -0.003 | 0.031  | 0.034      | 0.006  | 0.021  | 0.015      | 0.007  | 0.087  | 0.080      | -0.017 | 0.098  | 0.116      |
| C27  | 0.038  | 0.083  | 0.045      | 0.023  | 0.026  | 0.003      | 0.046  | 0.009  | -0.036     | 0.083  | 0.074  | -0.009     | 0.031  | 0.078  | 0.047      |
| C28  | 0.042  | 0.087  | 0.044      | 0.028  | 0.007  | -0.021     | 0.030  | 0.004  | -0.026     | 0.042  | 0.069  | 0.027      | 0.039  | 0.032  | -0.007     |
| C29  | 0.007  | 0.068  | 0.062      | 0.003  | 0.014  | 0.010      | 0.014  | -0.002 | -0.016     | 0.031  | 0.018  | -0.013     | 0.003  | 0.037  | 0.034      |
| C30  | 0.018  | 0.023  | 0.004      | 0.029  | 0.042  | 0.013      | 0.042  | 0.030  | -0.012     | 0.074  | 0.115  | 0.041      | 0.045  | 0.116  | 0.072      |
| C34  | 0.055  | 0.215  | 0.160      | 0.079  | 0.055  | -0.024     | 0.057  | 0.032  | -0.025     | 0.035  | 0.235  | 0.200      | 0.050  | 0.197  | 0.147      |
| N36  | 0.096  | 0.162  | 0.066      | 0.094  | 0.040  | -0.053     | 0.103  | 0.024  | -0.079     | 0.125  | 0.157  | 0.032      | 0.126  | 0.137  | 0.011      |
| C37  | 0.135  | 0.041  | -0.095     | 0.159  | 0.005  | -0.154     | 0.132  | 0.005  | -0.128     | 0.105  | 0.051  | -0.054     | 0.151  | 0.036  | -0.115     |
| C38  | 0.083  | 0.023  | -0.059     | 0.091  | 0.008  | -0.083     | 0.088  | 0.007  | -0.081     | 0.071  | 0.016  | -0.055     | 0.084  | 0.015  | -0.068     |
| C39  | 0.053  | -0.002 | -0.055     | 0.065  | -0.001 | -0.065     | 0.053  | 0.000  | -0.053     | 0.022  | -0.001 | -0.023     | 0.034  | -0.004 | -0.037     |
| C40  | 0.128  | 0.043  | -0.085     | 0.145  | 0.009  | -0.136     | 0.130  | 0.006  | -0.124     | 0.120  | 0.051  | -0.069     | 0.159  | 0.039  | -0.120     |
| C41  | 0.078  | 0.009  | -0.069     | 0.090  | 0.002  | -0.088     | 0.079  | 0.002  | -0.077     | 0.038  | 0.019  | -0.019     | 0.050  | 0.012  | -0.039     |
| C42  | 0.047  | 0.022  | -0.025     | 0.042  | 0.004  | -0.038     | 0.044  | 0.000  | -0.044     | 0.060  | 0.025  | -0.035     | 0.068  | 0.018  | -0.049     |
| A47  | 0.102  | 0.0055 | -0.0965    | 0.1224 | 0.0012 | -0.1212    | 0.1034 | 0.0007 | -0.1027    | 0.0731 | 0.0062 | -0.0669    | 0.1083 | 0.0045 | -0.1038    |
| A48  | 0.0109 | 0.0007 | -0.0102    | 0.0002 | 0.0007 | 0.0005     | 0.0249 | 0.0032 | -0.0217    | 0.0532 | 0.016  | -0.0372    | 0.0003 | 0.0016 | 0.0013     |

A = H, O or Cl which different atom in derivatives series; Values are mean  $\pm$  SD triplicate assays.

**Table S5.** Values of the condensed local softnesses (Hartree\*e) of compounds (**13a-j**) by using wb97xd/6-311++g(d,p) level of theory from CDFT point of view.

| Atoms      | 13a   |       | 13b   |        | 13c   |       | 13d   |       | 13e   |       | 13f   |       | 13g   |       | 13h   |        | 13i    |        | 13j   |       |
|------------|-------|-------|-------|--------|-------|-------|-------|-------|-------|-------|-------|-------|-------|-------|-------|--------|--------|--------|-------|-------|
|            | s+/s- | s-/s+ | s+/s- | s-/s+  | s+/s- | s-/s+ | s+/s- | s-/s+ | s+/s- | s-/s+ | s+/s- | s-/s+ | s+/s- | s-/s+ | s+/s- | s-/s+  | s+/s-  | s-/s+  | s+/s- | s-/s+ |
| <b>O1</b>  | 0.5   | 2.0   | 0.1   | 7.1    | 0.2   | 5.9   | 0.0   | -51.1 | 1.1   | 0.9   | 0.8   | 1.3   | 0.6   | 1.8   | 0.1   | 7.3    | 0.2    | 4.5    | 2.7   | 0.4   |
| <b>C2</b>  | 0.2   | 5.0   | 0.0   | 23.9   | 0.1   | 19.0  | 0.0   | 26.6  | 1.0   | 1.0   | 0.7   | 1.5   | 0.2   | 4.4   | 0.0   | 29.1   | 0.1    | 15.7   | 4.2   | 0.2   |
| <b>C3</b>  | 0.0   | 31.6  | 0.0   | 1993.5 | 0.0   | 186.6 | 0.0   | -35.7 | 1.2   | 0.8   | 0.4   | 2.8   | -1.2  | -0.8  | 0.0   | -144.2 | 0.0    | -163.1 | 225.3 | 0.0   |
| <b>C8</b>  | 0.5   | 2.1   | 0.1   | 9.4    | 0.1   | 7.7   | 0.1   | 9.8   | 1.1   | 0.9   | 0.8   | 1.3   | 0.6   | 1.6   | 0.1   | 9.9    | 0.2    | 5.8    | 5.1   | 0.2   |
| <b>C9</b>  | 0.5   | 2.0   | 0.1   | 7.2    | 0.2   | 6.0   | 0.1   | 8.3   | 1.1   | 0.9   | 0.8   | 1.3   | 0.6   | 1.7   | 0.1   | 7.7    | 0.2    | 4.7    | 3.2   | 0.3   |
| <b>C10</b> | 0.6   | 1.7   | 0.1   | 8.2    | 0.2   | 6.6   | 0.1   | 6.9   | 1.1   | 0.9   | 0.8   | 1.3   | 0.5   | 2.1   | 0.1   | 10.2   | 0.2    | 5.7    | 9.1   | 0.1   |
| <b>O11</b> | 0.4   | 2.6   | 0.1   | 10.6   | 0.1   | 8.5   | 0.1   | 10.7  | 1.1   | 0.9   | 0.7   | 1.3   | 0.3   | 3.5   | 0.1   | 11.0   | 0.2    | 6.4    | 5.8   | 0.2   |
| <b>O16</b> | 0.6   | 1.6   | 0.2   | 5.2    | 0.2   | 4.3   | 0.1   | 18.6  | 1.1   | 0.9   | 0.8   | 1.2   | 0.7   | 1.5   | 0.2   | 5.3    | 0.3    | 3.4    | 7.3   | 0.1   |
| <b>C21</b> | 0.6   | 1.7   | 0.2   | 4.2    | 0.3   | 3.0   | 0.1   | 14.4  | 1.0   | 1.0   | 0.6   | 1.7   | 0.4   | 2.5   | 0.1   | 10.5   | 0.2    | 4.4    | 0.9   | 1.2   |
| <b>O24</b> | 2.1   | 0.5   | -2.4  | -0.4   | -3.3  | -0.3  | -1.6  | -0.6  | 1.8   | 0.6   | 1.0   | 1.0   | 0.7   | 1.5   | -2.6  | -0.4   | 12.9   | 0.1    | 0.5   | 1.8   |
| <b>C25</b> | 1.0   | 1.0   | -3.1  | -0.3   | -4.0  | -0.3  | -2.0  | -0.5  | 1.1   | 0.9   | 0.7   | 1.5   | 0.5   | 2.0   | -1.7  | -0.6   | 33.9   | 0.0    | 0.1   | 7.4   |
| <b>C26</b> | 1.2   | 0.8   | 20.1  | 0.0    | 25.1  | 0.0   | 2.6   | 0.4   | 0.8   | 1.2   | 0.6   | 1.8   | 0.3   | 3.6   | 7.4   | 0.1    | 1.0    | 1.0    | 0.1   | 15.5  |
| <b>C27</b> | 0.7   | 1.5   | 1.6   | 0.6    | 2.1   | 0.5   | 5.8   | 0.2   | 1.2   | 0.8   | 0.6   | 1.7   | 0.0   | -23.0 | 0.9   | 1.1    | 1.8    | 0.5    | 0.3   | 3.3   |
| <b>C28</b> | 1.1   | 0.9   | 0.5   | 2.2    | 1.7   | 0.6   | -0.3  | -3.1  | 1.4   | 0.7   | 0.2   | 4.2   | 0.6   | 1.6   | 2.3   | 0.4    | 1.8    | 0.6    | 0.8   | 1.3   |
| <b>C29</b> | 0.9   | 1.1   | 4.5   | 0.2    | 5.5   | 0.2   | 53.7  | 0.0   | 0.4   | 2.4   | 0.4   | 2.6   | 0.4   | 2.3   | 2.3   | 0.4    | 1.7    | 0.6    | 0.3   | 3.3   |
| <b>C30</b> | 1.3   | 0.8   | -13.8 | -0.1   | -19.8 | -0.1  | 0.3   | 3.6   | 1.4   | 0.7   | 0.6   | 1.5   | 0.5   | 1.9   | -7.6  | -0.1   | 2.7    | 0.4    | 0.3   | 3.8   |
| <b>C34</b> | 0.5   | 2.2   | -27.5 | 0.0    | -60.1 | 0.0   | 2.3   | 0.4   | 0.3   | 3.9   | 0.5   | 2.2   | 0.6   | 1.7   | -48.5 | 0.0    | 0.9    | 1.1    | 0.1   | 7.5   |
| <b>N36</b> | 0.9   | 1.1   | 3.6   | 0.3    | 5.2   | 0.2   | 1.0   | 1.0   | 0.7   | 1.5   | 0.4   | 2.3   | 0.4   | 2.3   | 8.5   | 0.1    | 1.9    | 0.5    | 0.2   | 4.1   |
| <b>C37</b> | 9.6   | 0.1   | -22.3 | 0.0    | -16.1 | -0.1  | 1.8   | 0.5   | 4.5   | 0.2   | 22.7  | 0.0   | 67.7  | 0.0   | -16.4 | -0.1   | 1321.0 | 0.0    | 3.5   | 0.3   |
| <b>C38</b> | 2.6   | 0.4   | 18.7  | 0.1    | 20.1  | 0.0   | 42.8  | 0.0   | 1.6   | 0.6   | 2.0   | 0.5   | 2.3   | 0.4   | 58.7  | 0.0    | 5.7    | 0.2    | 0.7   | 1.4   |
| <b>C39</b> | 1.5   | 0.7   | 9.5   | 0.1    | 6.6   | 0.2   | 1.8   | 0.5   | 1.1   | 0.9   | 1.9   | 0.5   | 2.3   | 0.4   | 10.9  | 0.1    | 2.9    | 0.3    | 0.6   | 1.6   |
| <b>C40</b> | 2.1   | 0.5   | 9.6   | 0.1    | 9.7   | 0.1   | -0.1  | -7.3  | 1.4   | 0.7   | 1.7   | 0.6   | 2.0   | 0.5   | 9.6   | 0.1    | 3.6    | 0.3    | 0.8   | 1.3   |
| <b>C41</b> | 1.8   | 0.5   | 12.6  | 0.1    | 9.3   | 0.1   | 2.0   | 0.5   | 1.2   | 0.8   | 2.4   | 0.4   | 2.8   | 0.4   | 10.8  | 0.1    | 3.4    | 0.3    | 0.8   | 1.3   |
| <b>C42</b> | 2.5   | 0.4   | 29.7  | 0.0    | 28.1  | 0.0   | 36.4  | 0.0   | 1.6   | 0.6   | 1.8   | 0.6   | 2.1   | 0.5   | 33.4  | 0.0    | 5.1    | 0.2    | 0.8   | 1.3   |
| <b>A47</b> | 1.5   | 0.7   | 15.4  | 0.1    | 8.0   | 0.1   | -2.2  | -0.5  | 1.1   | 0.9   | 3.4   | 0.3   | 4.1   | 0.2   | 14.1  | 0.1    | 3.8    | 0.3    | 0.9   | 1.1   |

|            |     |     |       |      |       |      |      |      |     |     |     |     |     |     |      |      |      |     |     |     |
|------------|-----|-----|-------|------|-------|------|------|------|-----|-----|-----|-----|-----|-----|------|------|------|-----|-----|-----|
| <b>A48</b> | 1.2 | 0.9 | -10.4 | -0.1 | -13.7 | -0.1 | -1.7 | -0.6 | 2.1 | 0.5 | 1.0 | 1.0 | 0.5 | 1.9 | -2.3 | -0.4 | 23.8 | 0.0 | 0.2 | 5.5 |
|------------|-----|-----|-------|------|-------|------|------|------|-----|-----|-----|-----|-----|-----|------|------|------|-----|-----|-----|

**Table S6.** Values of the condensed local electrophilicity (EIP)/nucleophilicity (NuP) index (e\*eV) of compounds (**13a-j**) by using wb97xd/6-311++g(d,p) level of theory from CDFT point of view.

| Atoms      | 13a   |       | 13b   |       | 13c   |       | 13d   |       | 13e   |       | 13f   |       | 13g   |       | 13h   |       | 13i   |       | 13j   |       |
|------------|-------|-------|-------|-------|-------|-------|-------|-------|-------|-------|-------|-------|-------|-------|-------|-------|-------|-------|-------|-------|
|            | EIP   | NuP   |
| <b>O1</b>  | -0.01 | -0.01 | -0.01 | -0.05 | -0.01 | -0.03 | 0.00  | -0.04 | -0.01 | -0.01 | -0.01 | -0.01 | 0.00  | -0.01 | 0.00  | -0.05 | -0.01 | -0.03 | -0.02 | -0.01 |
| <b>C2</b>  | 0.00  | -0.02 | 0.00  | -0.10 | 0.00  | -0.07 | 0.00  | -0.06 | -0.01 | 0.00  | 0.00  | -0.01 | 0.00  | -0.01 | 0.00  | -0.10 | 0.00  | -0.05 | -0.02 | 0.00  |
| <b>C3</b>  | 0.00  | -0.02 | 0.00  | -0.15 | 0.00  | -0.10 | 0.00  | -0.09 | 0.00  | 0.00  | 0.00  | 0.00  | 0.00  | 0.00  | 0.00  | -0.15 | 0.00  | -0.06 | -0.08 | 0.00  |
| <b>C8</b>  | -0.01 | -0.02 | -0.01 | -0.08 | -0.01 | -0.05 | 0.00  | -0.05 | -0.01 | -0.01 | -0.01 | -0.01 | -0.01 | -0.01 | -0.01 | -0.09 | -0.01 | -0.04 | -0.06 | -0.01 |
| <b>C9</b>  | -0.01 | -0.02 | -0.01 | -0.06 | -0.01 | -0.04 | 0.00  | -0.04 | -0.01 | -0.01 | -0.01 | -0.01 | -0.01 | -0.01 | -0.01 | -0.07 | -0.01 | -0.03 | -0.03 | -0.01 |
| <b>C10</b> | 0.00  | -0.01 | 0.00  | -0.03 | 0.00  | -0.02 | 0.00  | -0.02 | 0.00  | 0.00  | 0.00  | 0.00  | 0.00  | 0.00  | 0.00  | -0.03 | 0.00  | -0.01 | -0.03 | 0.00  |
| <b>O11</b> | -0.01 | -0.03 | -0.01 | -0.15 | -0.01 | -0.10 | 0.00  | -0.10 | -0.02 | -0.01 | -0.01 | -0.02 | 0.00  | -0.02 | -0.01 | -0.16 | -0.01 | -0.07 | -0.09 | -0.01 |
| <b>O16</b> | -0.01 | -0.01 | -0.01 | -0.04 | -0.01 | -0.03 | 0.00  | -0.03 | -0.01 | -0.01 | -0.01 | -0.01 | -0.01 | -0.01 | -0.01 | -0.04 | -0.01 | -0.02 | -0.06 | -0.01 |
| <b>C21</b> | -0.01 | -0.01 | 0.00  | -0.02 | -0.01 | -0.01 | 0.00  | -0.01 | -0.01 | -0.01 | 0.00  | -0.01 | 0.00  | -0.01 | 0.00  | -0.02 | 0.00  | -0.01 | 0.00  | 0.00  |
| <b>O24</b> | -0.04 | -0.02 | -0.03 | 0.02  | -0.04 | 0.01  | 0.00  | 0.02  | -0.04 | -0.02 | -0.02 | -0.03 | -0.01 | -0.02 | -0.01 | 0.00  | -0.01 | 0.00  | -0.01 | -0.01 |
| <b>C25</b> | -0.05 | -0.05 | -0.04 | 0.02  | -0.06 | 0.01  | -0.01 | 0.02  | -0.08 | -0.07 | -0.05 | -0.09 | -0.02 | -0.04 | -0.02 | 0.02  | -0.03 | 0.00  | -0.01 | -0.02 |
| <b>C26</b> | -0.03 | -0.03 | -0.02 | 0.00  | -0.03 | 0.00  | 0.00  | 0.00  | -0.03 | -0.03 | -0.02 | -0.05 | -0.02 | -0.08 | -0.01 | 0.00  | -0.02 | -0.02 | 0.00  | -0.05 |
| <b>C27</b> | -0.03 | -0.04 | -0.02 | -0.02 | -0.03 | -0.01 | 0.00  | 0.00  | -0.07 | -0.05 | -0.03 | -0.07 | 0.00  | -0.06 | -0.01 | -0.01 | -0.04 | -0.02 | -0.01 | -0.03 |
| <b>C28</b> | -0.03 | -0.03 | -0.01 | -0.02 | -0.03 | -0.01 | 0.00  | -0.02 | -0.05 | -0.03 | -0.01 | -0.05 | -0.02 | -0.05 | -0.03 | -0.02 | -0.04 | -0.02 | -0.03 | -0.03 |
| <b>C29</b> | -0.04 | -0.04 | -0.03 | -0.01 | -0.04 | -0.01 | 0.00  | 0.00  | -0.02 | -0.04 | -0.02 | -0.06 | -0.02 | -0.07 | -0.02 | -0.01 | -0.03 | -0.02 | -0.02 | -0.04 |
| <b>C30</b> | -0.04 | -0.03 | -0.02 | 0.00  | -0.04 | 0.00  | 0.00  | -0.01 | -0.05 | -0.03 | -0.02 | -0.04 | -0.04 | -0.10 | -0.04 | 0.01  | -0.05 | -0.02 | -0.02 | -0.06 |
| <b>C34</b> | -0.04 | -0.09 | -0.05 | 0.00  | -0.05 | 0.00  | 0.00  | -0.01 | -0.03 | -0.11 | -0.05 | -0.15 | -0.06 | -0.14 | -0.05 | 0.00  | -0.04 | -0.04 | -0.02 | -0.09 |
| <b>N36</b> | -0.08 | -0.08 | -0.05 | -0.02 | -0.08 | -0.01 | 0.00  | -0.02 | -0.07 | -0.10 | -0.04 | -0.14 | -0.04 | -0.13 | -0.04 | -0.01 | -0.07 | -0.03 | -0.03 | -0.08 |
| <b>C37</b> | -0.05 | 0.00  | -0.08 | 0.00  | -0.06 | 0.00  | -0.01 | -0.03 | -0.03 | -0.01 | -0.07 | 0.00  | -0.09 | 0.00  | -0.07 | 0.01  | -0.04 | 0.00  | -0.02 | 0.00  |
| <b>C38</b> | -0.06 | -0.02 | -0.06 | 0.00  | -0.06 | 0.00  | -0.01 | 0.00  | -0.05 | -0.03 | -0.06 | -0.04 | -0.07 | -0.04 | -0.06 | 0.00  | -0.05 | -0.01 | -0.02 | -0.02 |
| <b>C39</b> | -0.04 | -0.02 | -0.05 | -0.01 | -0.04 | 0.00  | -0.01 | -0.02 | -0.03 | -0.03 | -0.05 | -0.03 | -0.05 | -0.03 | -0.04 | -0.01 | -0.03 | -0.01 | -0.02 | -0.02 |
| <b>C40</b> | -0.09 | -0.04 | -0.08 | -0.01 | -0.08 | -0.01 | 0.00  | -0.06 | -0.08 | -0.05 | -0.07 | -0.06 | -0.08 | -0.05 | -0.07 | -0.01 | -0.06 | -0.02 | -0.03 | -0.03 |
| <b>C41</b> | -0.04 | -0.02 | -0.06 | -0.01 | -0.04 | 0.00  | -0.01 | -0.02 | -0.04 | -0.03 | -0.06 | -0.03 | -0.07 | -0.03 | -0.05 | -0.01 | -0.04 | -0.01 | -0.02 | -0.02 |



|            |       |       |       |       |       |       |       |      |       |       |       |       |       |       |       |       |       |       |       |       |
|------------|-------|-------|-------|-------|-------|-------|-------|------|-------|-------|-------|-------|-------|-------|-------|-------|-------|-------|-------|-------|
| <b>C42</b> | -0.05 | -0.02 | -0.04 | 0.00  | -0.05 | 0.00  | -0.01 | 0.00 | -0.04 | -0.02 | -0.04 | -0.03 | -0.04 | -0.03 | -0.04 | 0.00  | -0.04 | -0.01 | -0.02 | -0.02 |
| <b>A47</b> | -0.04 | -0.03 | -0.08 | -0.01 | -0.14 | -0.01 | -0.05 | 0.17 | -0.04 | -0.03 | -0.07 | -0.03 | -0.08 | -0.03 | -0.07 | -0.01 | -0.12 | -0.03 | -0.07 | -0.05 |
| <b>A48</b> | -0.02 | -0.02 | -0.02 | 0.00  | -0.02 | 0.00  | 0.00  | 0.00 | -0.04 | -0.02 | -0.02 | -0.02 | -0.02 | -0.05 | -0.03 | 0.02  | -0.05 | 0.00  | -0.01 | -0.03 |

*Values are mean  $\pm$  SD triplicate assays*

## References

1. Z. Yang, D. Zhang, J. Ren, M. Yang, and S. Li. Acetylcholinesterase inhibitory activity of the total alkaloid from traditional Chinese herbal medicine for treating Alzheimer's disease. *Medicinal Chemistry Research*. 21(6) (2012) 734-738. <https://doi.org/10.1007/s00044-011-9582-8>.
2. A.H. Hasan, S. Shakya, F.H.S. Hussain, S. Murugesan, S. Chander, M.R.F. Pratama, S. Jamil, B. Das, S. Biswas, and J. Jamalis. Design, synthesis, anti-acetylcholinesterase evaluation and molecular modelling studies of novel coumarin-chalcone hybrids. *Journal of Biomolecular Structure and Dynamics*. (2023) 1-13. <https://doi.org/10.1080/07391102.2022.2162583>.
3. A.H. Hasan, S. Murugesan, S.I. Amran, S. Chander, M.M. Alanazi, T.B. Hadda, S. Shakya, M.R.F. Pratama, B. Das, S. Biswas, and J. Jamalis. Novel thiophene Chalcones-Coumarin as acetylcholinesterase inhibitors: Design, synthesis, biological evaluation, molecular docking, ADMET prediction and molecular dynamics simulation. *Bioorganic Chemistry*. 119 (2022) 105572. <https://doi.org/10.1016/j.bioorg.2021.105572>.
4. A. Abdalla Ali, S.A. Mhamad, A.H. Hasan, I. Ahmad, S.A. Abdullah, S. Jamil, H. Patel, S. Murugesan, and J. Jamalis. Synthesis, biological evaluation and molecular modeling studies of modulated benzyloxchalcones as potential acetylcholinesterase inhibitors. *Journal of Biomolecular Structure and Dynamics*. (2023) 1-12. <https://doi.org/10.1080/07391102.2023.2220032>.
5. H.A. Hasan, S.M.F. Yusof, A.N. Kamarudin, S. Murugesan, S. Shakya, and J. Jamalis. Synthesis, Anti-acetylcholinesterase Evaluation, Molecular Docking and Molecular Dynamics Simulation of Novel Psoralen Derivatives. *Current Organic Synthesis*. 20 (2023) 1-17. <http://dx.doi.org/10.2174/1570179420666230328121554>.
6. K. Gnanaguru, N. Ramasubbu, K. Venkatesan, and V. Ramamurthy. A study on the photochemical dimerization of coumarins in the solid state. *The Journal of Organic Chemistry*. 50(13) (1985) 2337-2346. <https://doi.org/10.1021/jo00213a027>.
